# Supplementary material for: Cobalt-assisted route to rare carbocyclic C-ribonucleosides
Source: Royal Society of Chemistry journal article supplement (doi:10.1039/d3ra04937j), 2023-01-01
Supplement: d3ra04937j1.pdf [file d3ra04937j1.pdf]

## Cobalt-assisted Route to Rare Carbocyclic C-Ribonucleosides

A. C. Ojeda-Porras,<sup>a</sup> V. Roy,<sup>\*,a</sup> O. Bourzikat,<sup>a</sup> P. Favetta<sup>a</sup> and L. A. Agrofoglio<sup>\*,a</sup>

- a. Université d'Orléans et CNRS, ICOA, UMR 7311, F-45067, Orléans, France.  
E-mail : [luigi.agrofoglio@univ-orleans.fr](mailto:luigi.agrofoglio@univ-orleans.fr)

### Contents

- I. NMR Spectra of all synthesized compounds.....2  
II. 3D view of best conformer of compounds **2** and **3** using Cheminfo.org .....46

**(3aR,6aR)-2,2-dimethyl-3a,6a-dihydro-4H-cyclopenta[d][1,3]dioxol-4-one (1)**

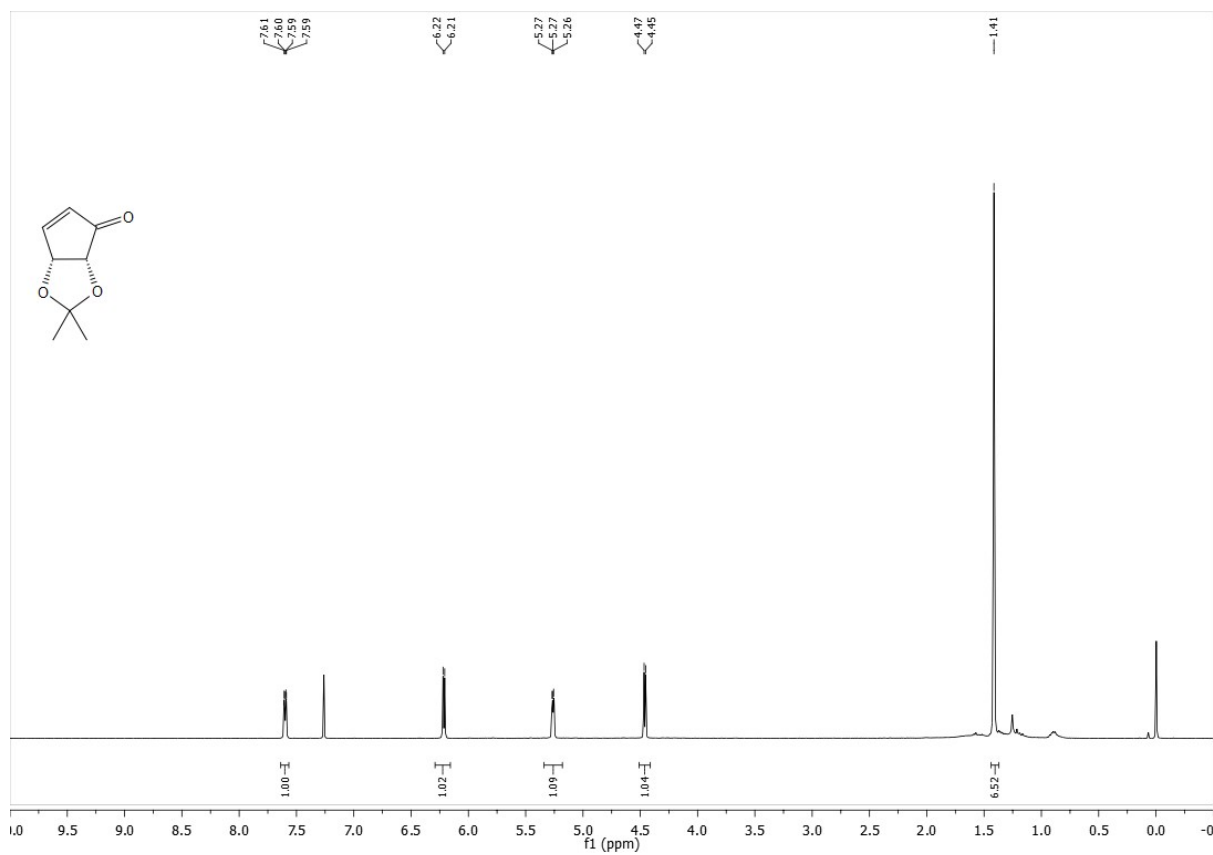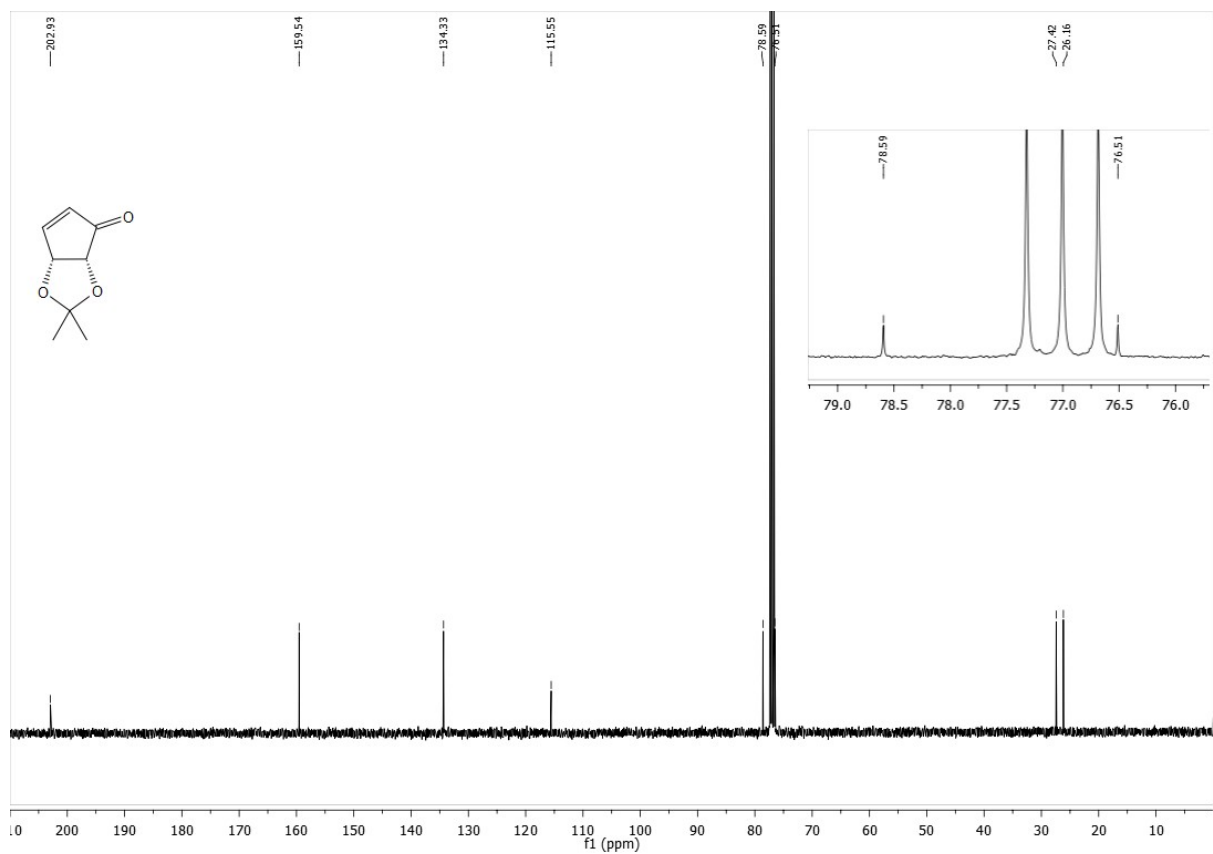

(3aR,6R,6aR)-2,2-dimethyl-6-vinyltetrahydro-4H-cyclopenta[d][1,3]dioxol-4-one (2)

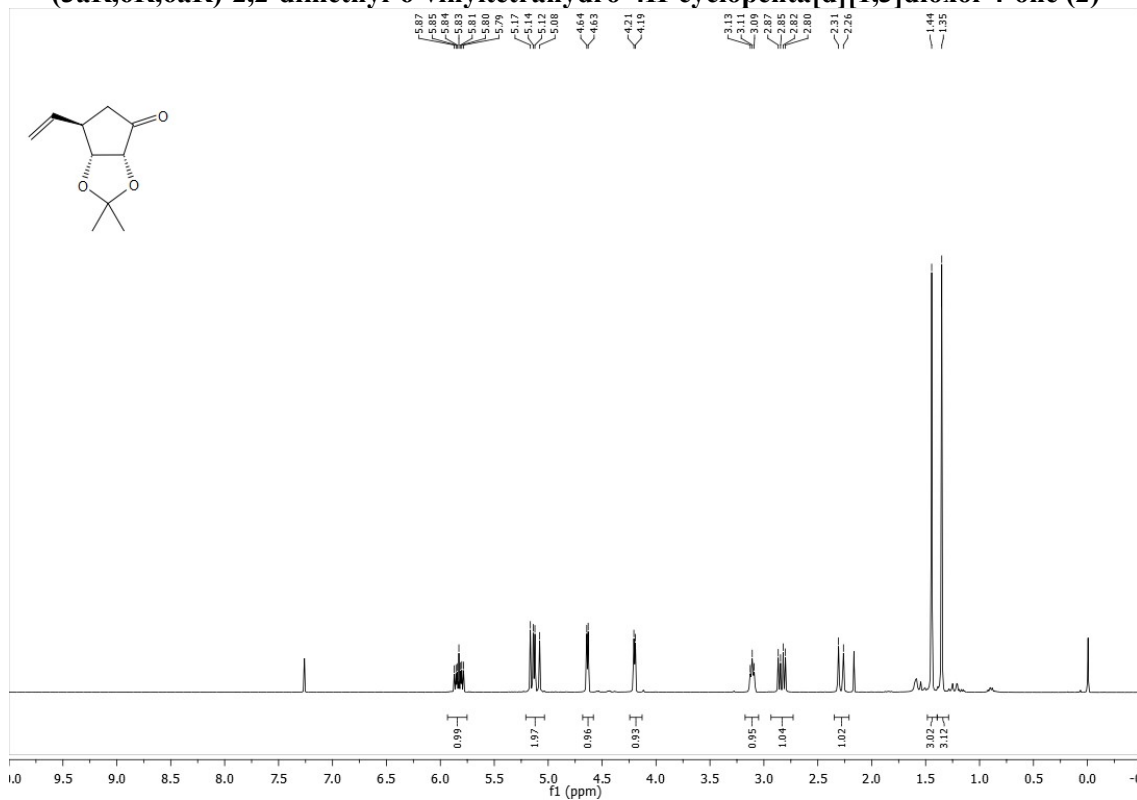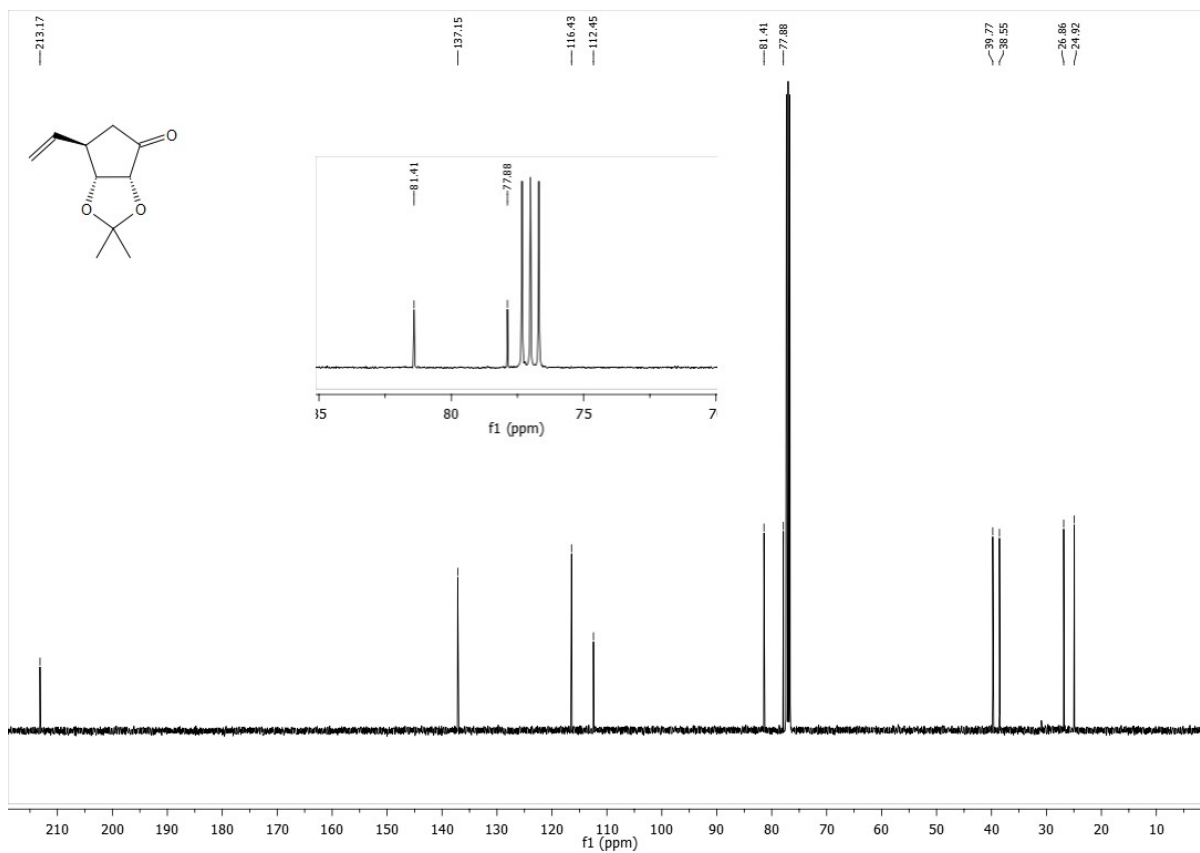

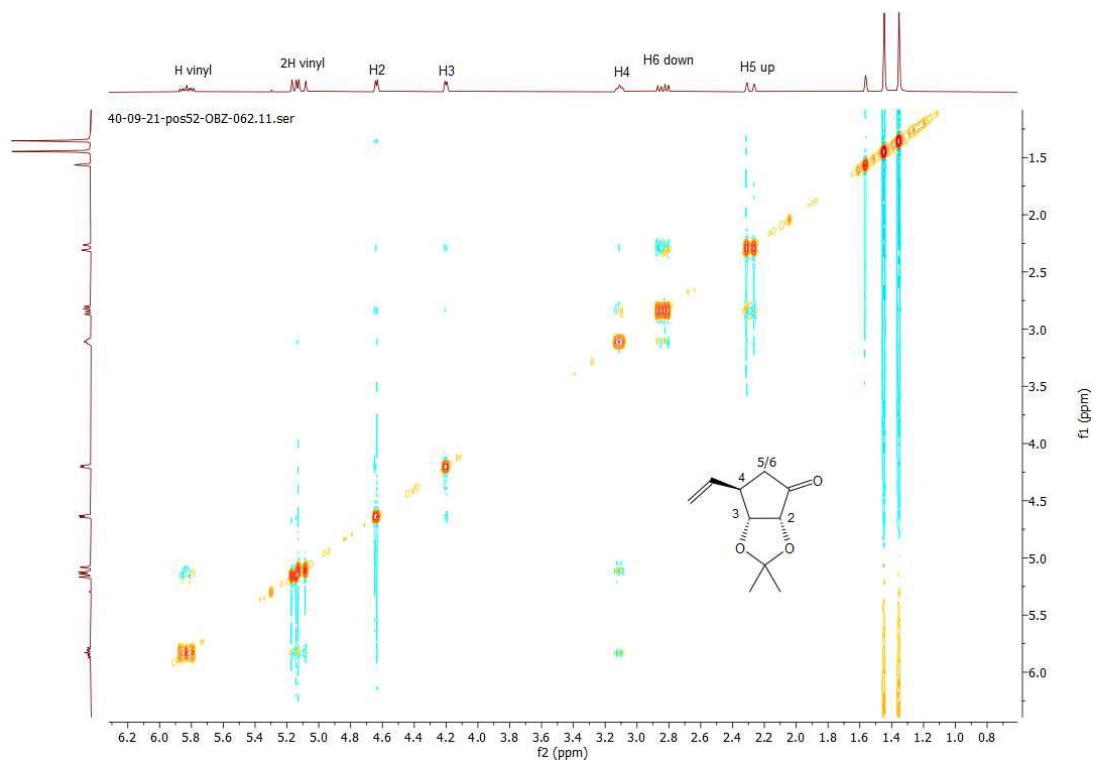

**(3aS,4S,6R,6aR)-2,2-dimethyl-6-vinyltetrahydro-4H-cyclopenta[d][1,3]dioxol-4-ol (3)**

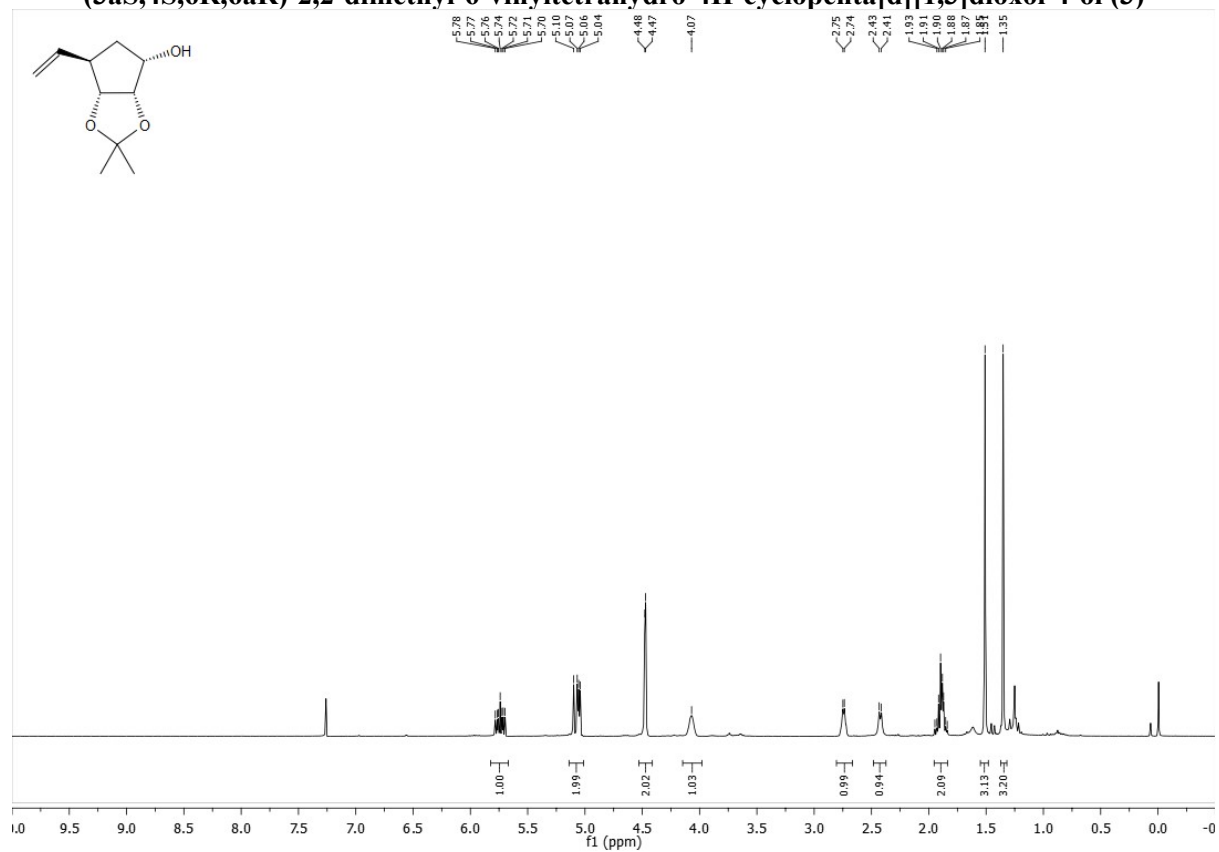

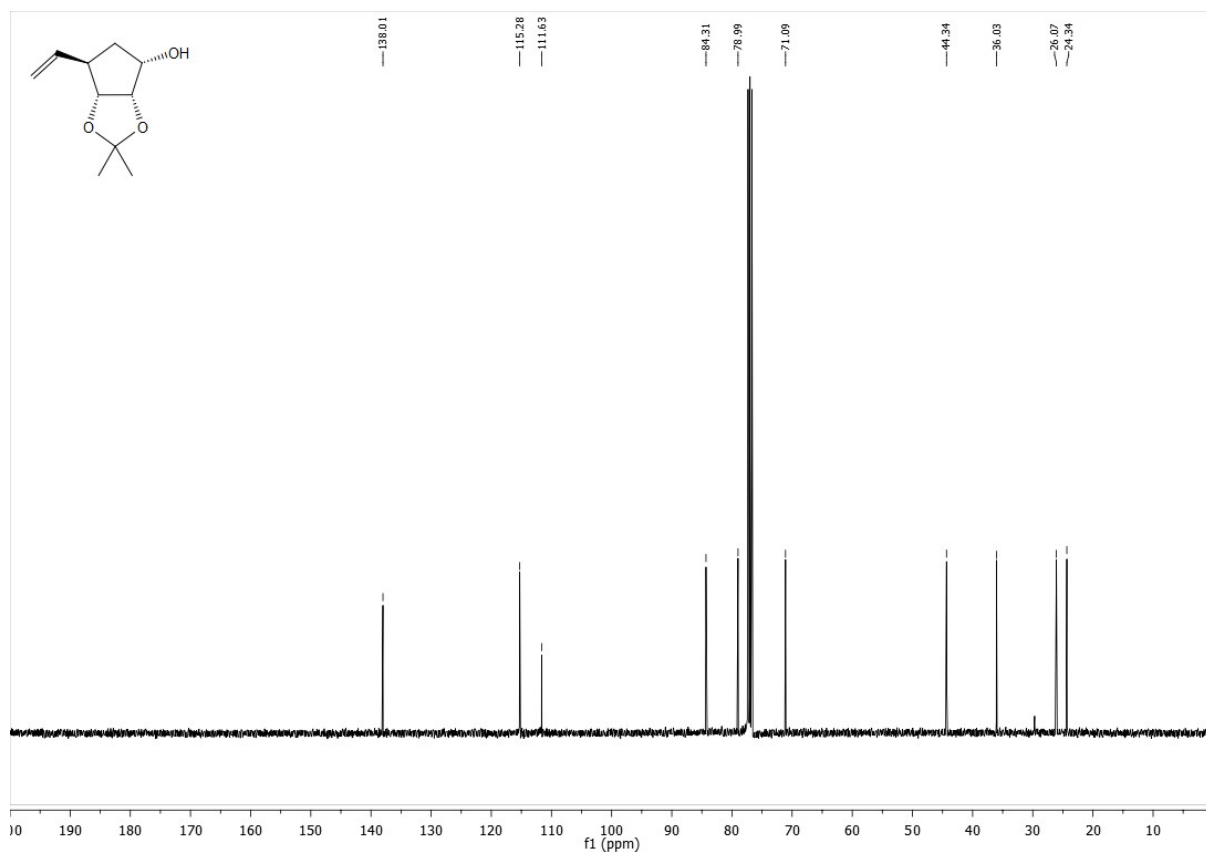

(3aS,4S,6R,6aR)-2,2-dimethyl-6-vinyltetrahydro-4H-cyclopenta[d][1,3]dioxol-4-ol (3)  
[CDCl<sub>3</sub>+D<sub>2</sub>O]

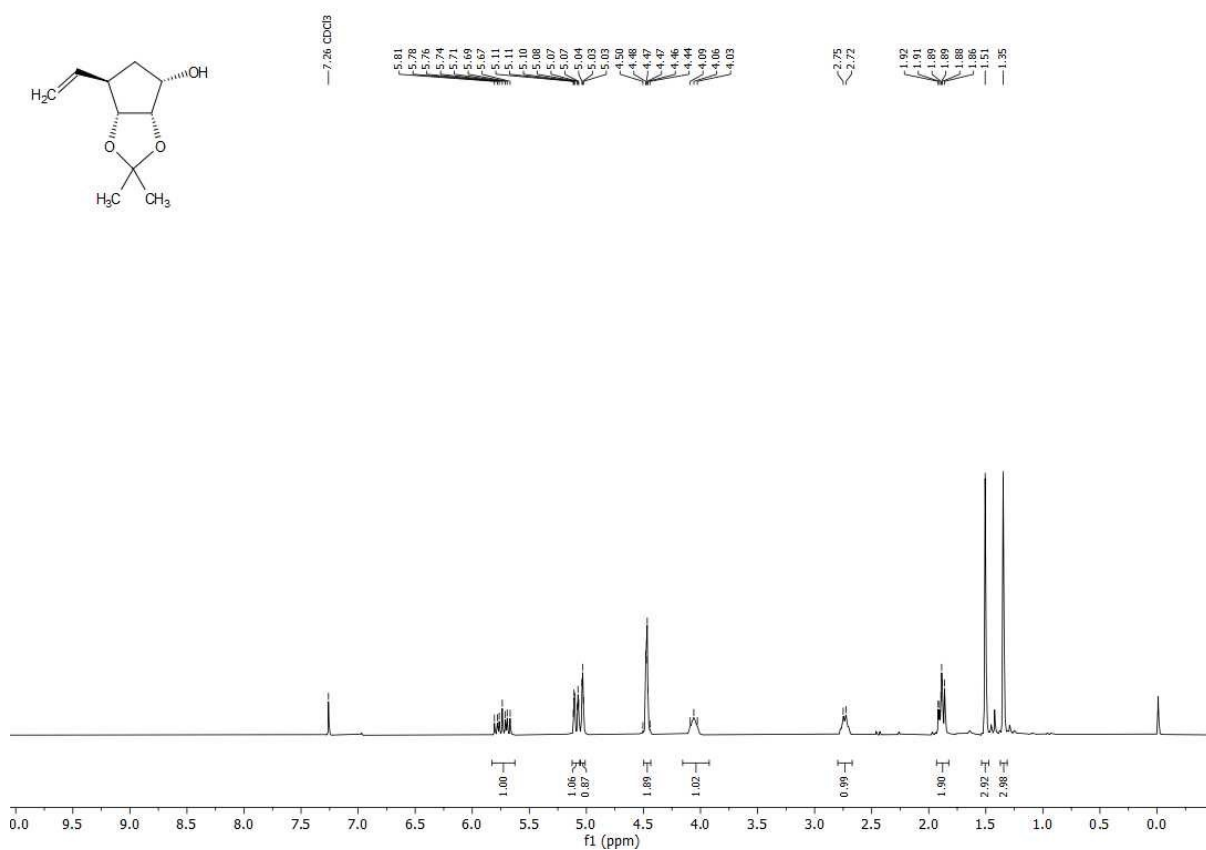

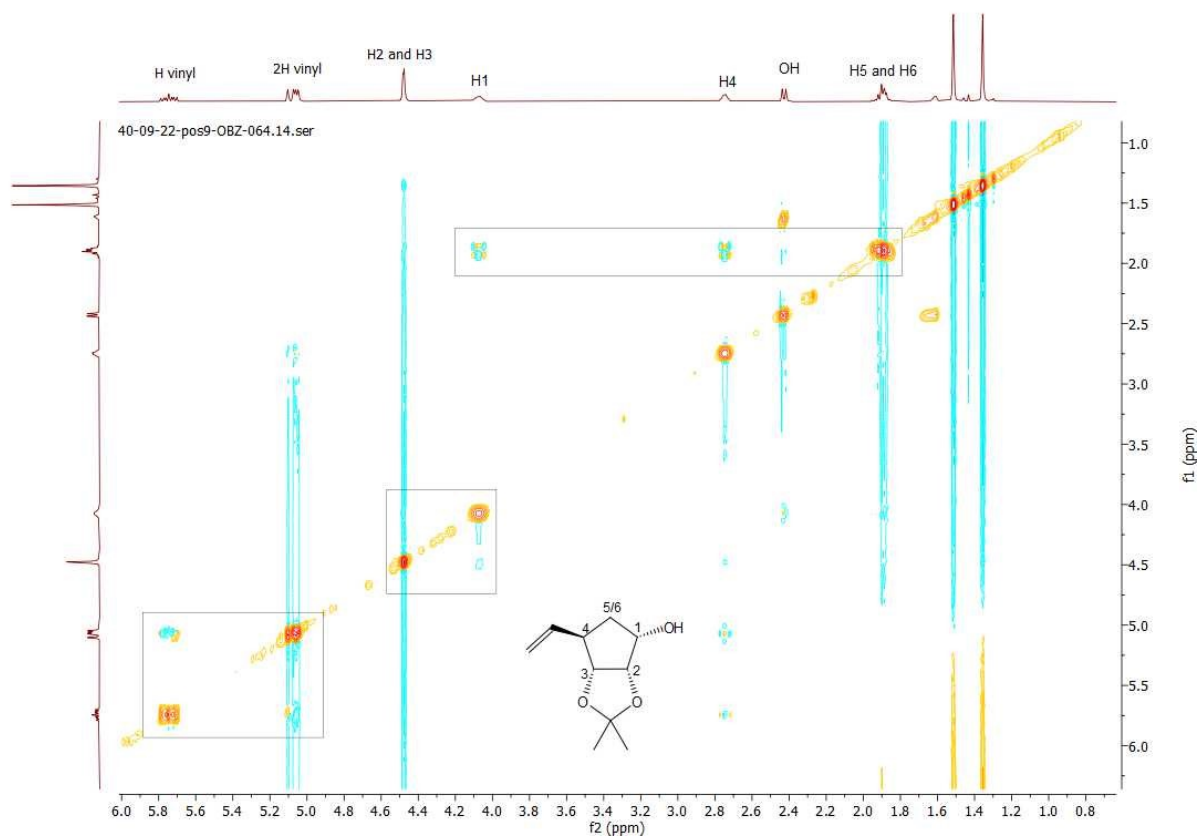

**(3aR,4R,6R,6aR)-4-iodo-2,2-dimethyl-6-vinyltetrahydro-4H-cyclopenta[d][1,3]dioxole (4)**

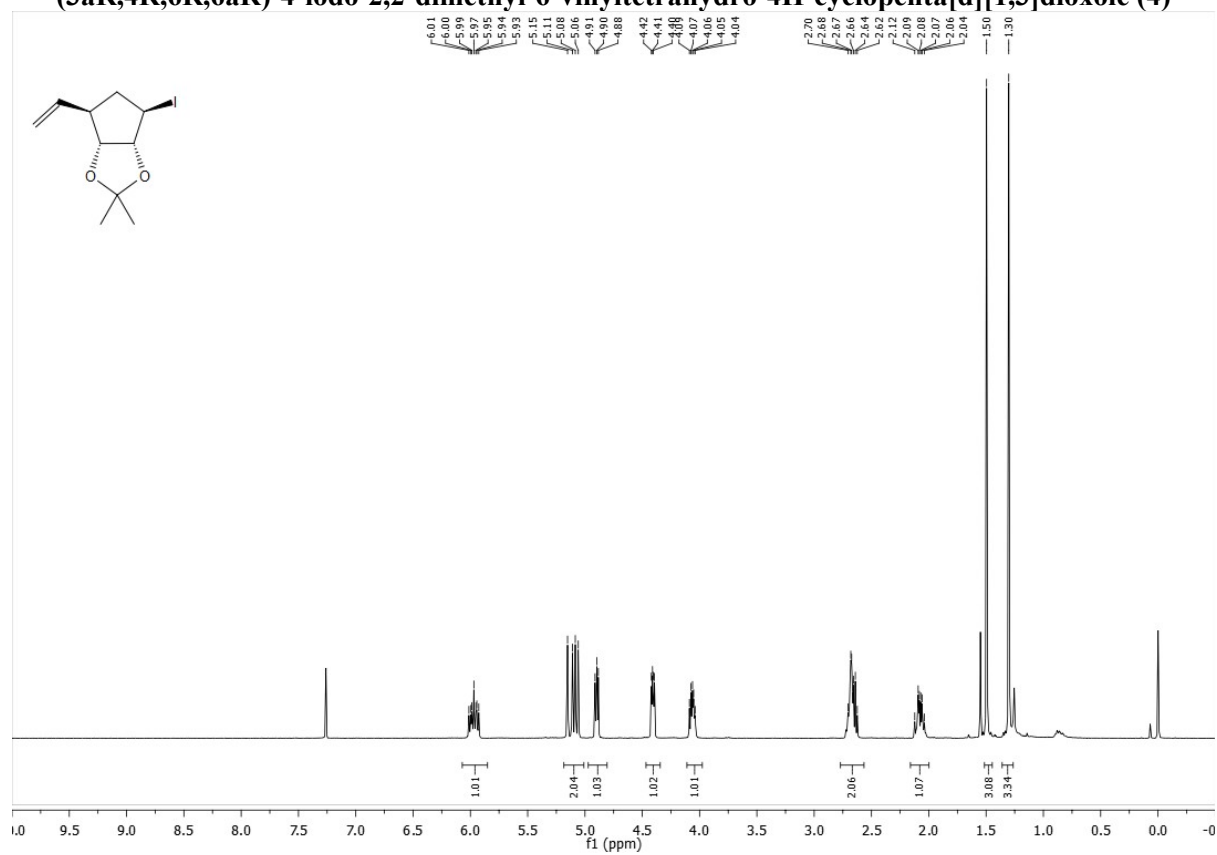

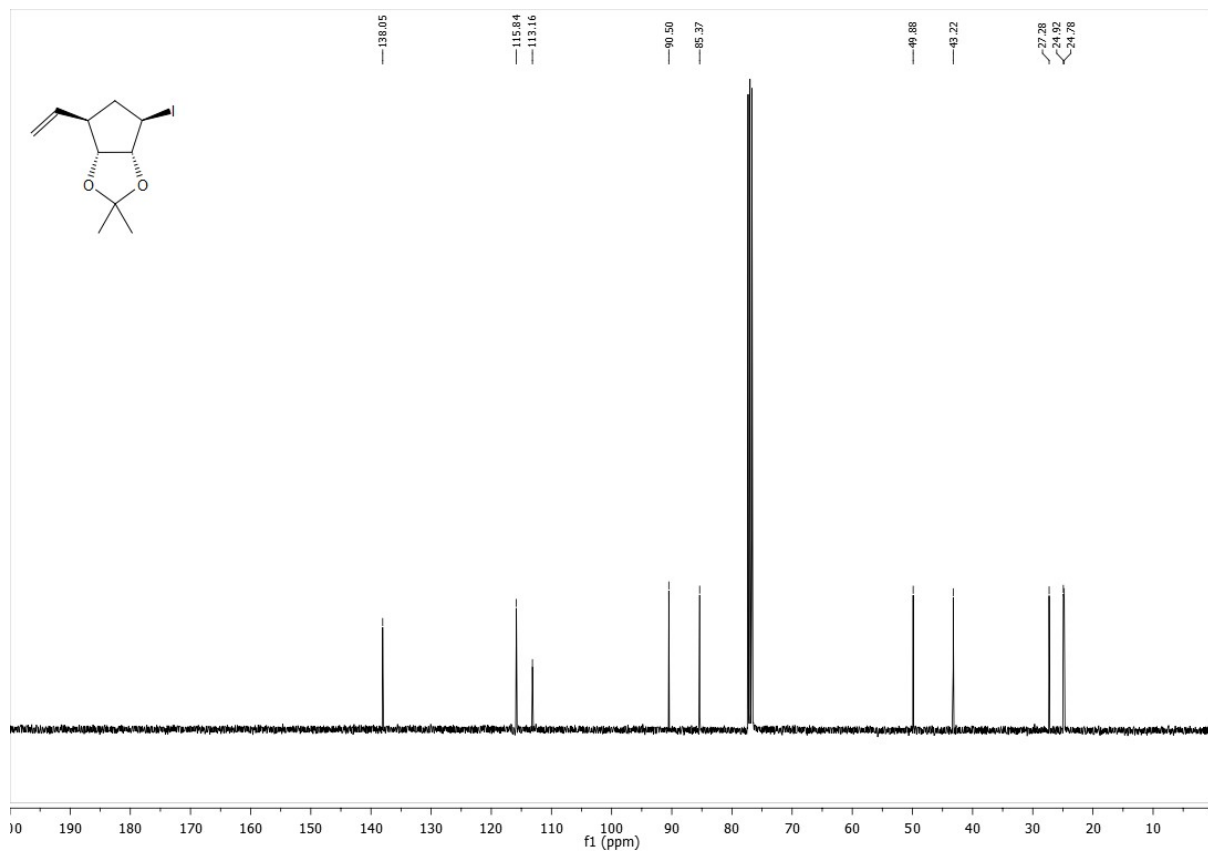

(±)-2-iodocyclopentan-1-ol (6)

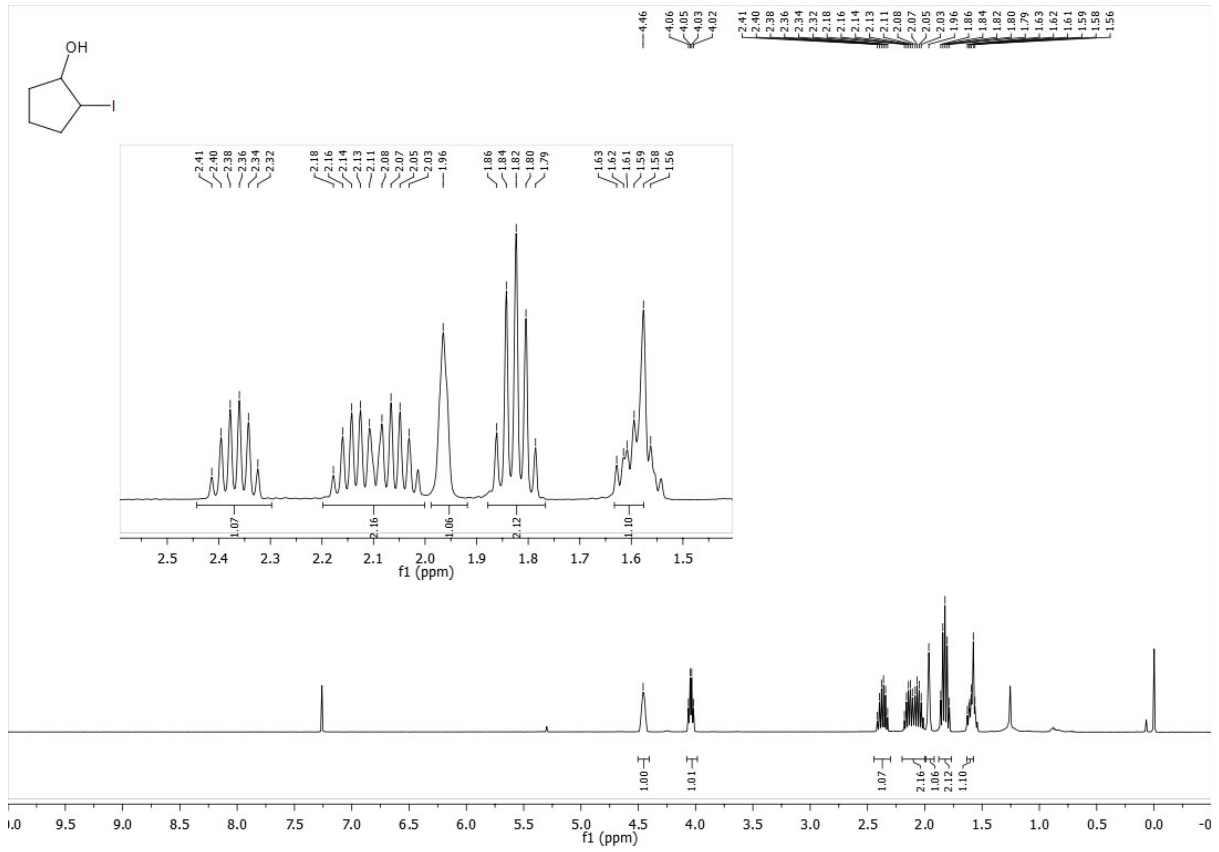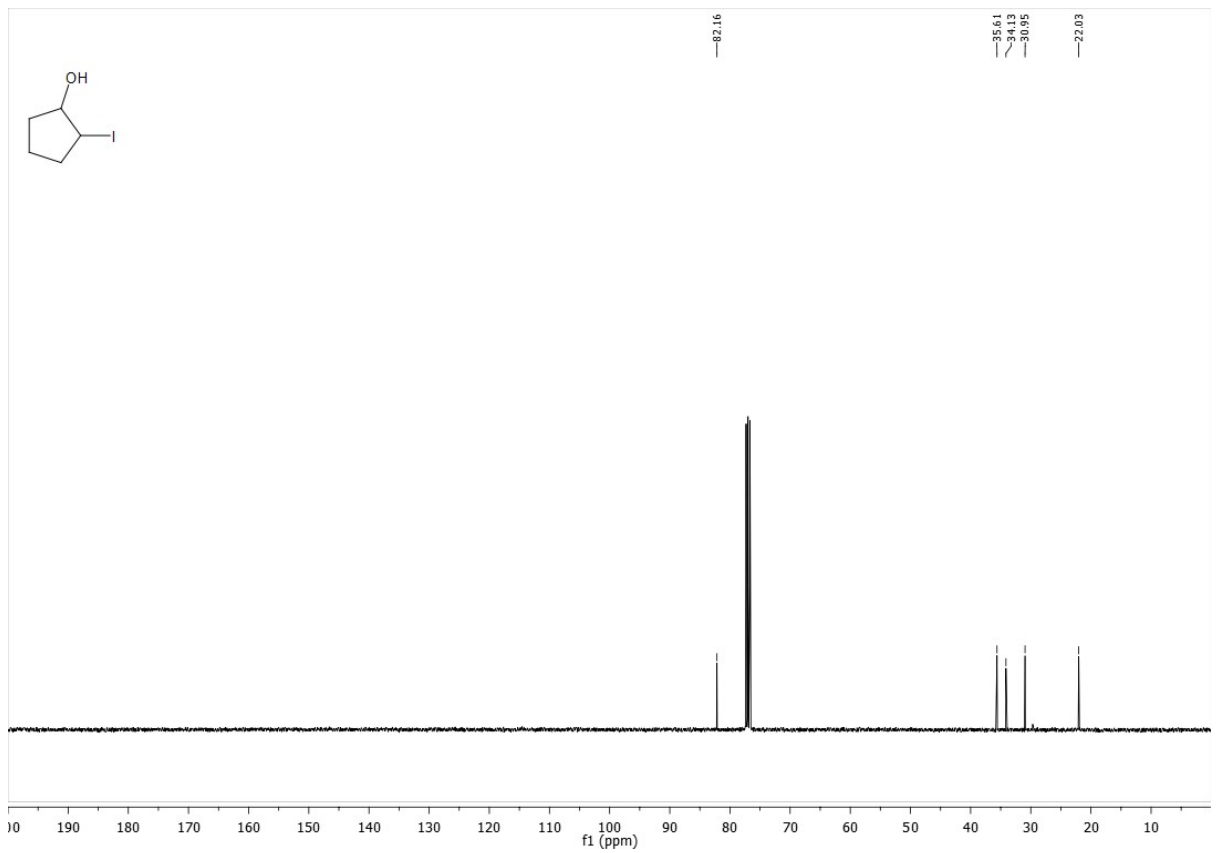



(±)-*tert*-butyl((2-iodocyclopentyl)oxy)dimethylsilane (7)

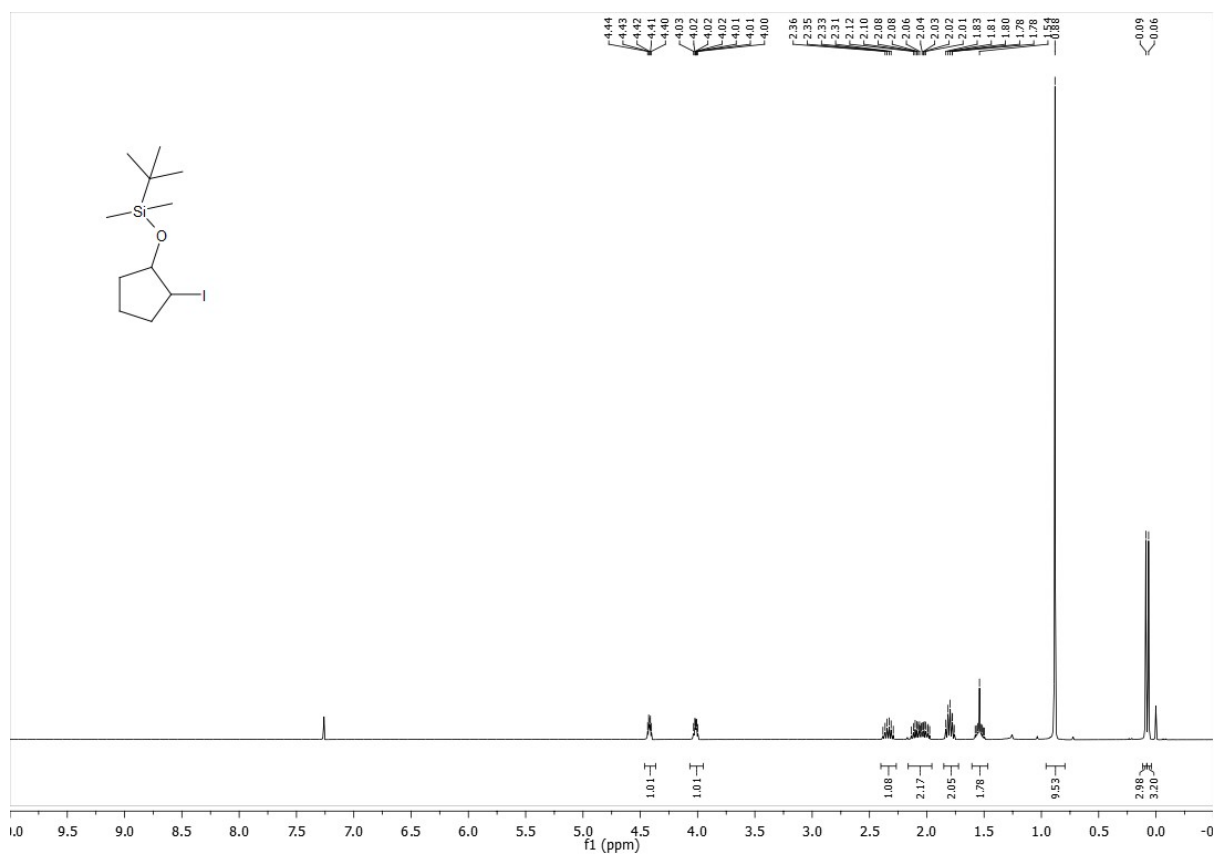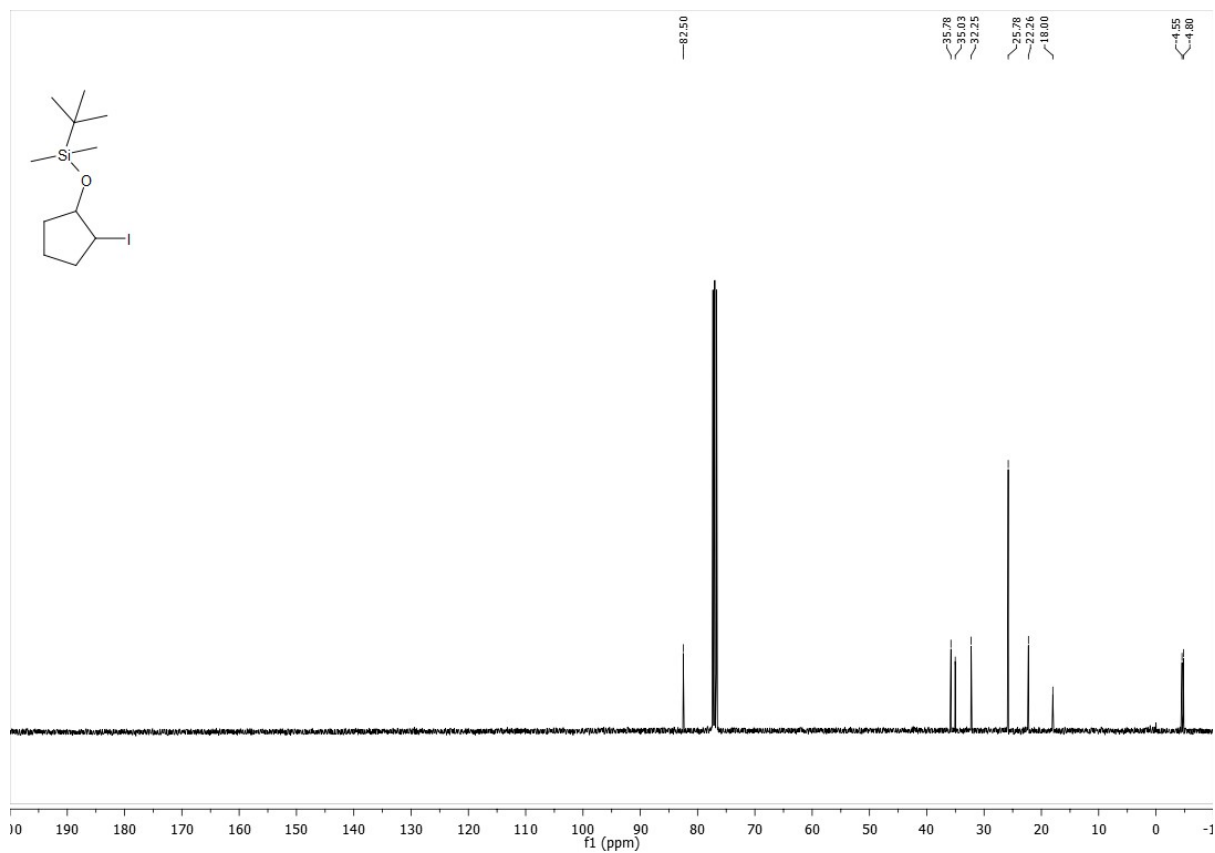

(±)-*tert*-butyldimethyl((2-phenylcyclopentyl)oxy)silane (8)

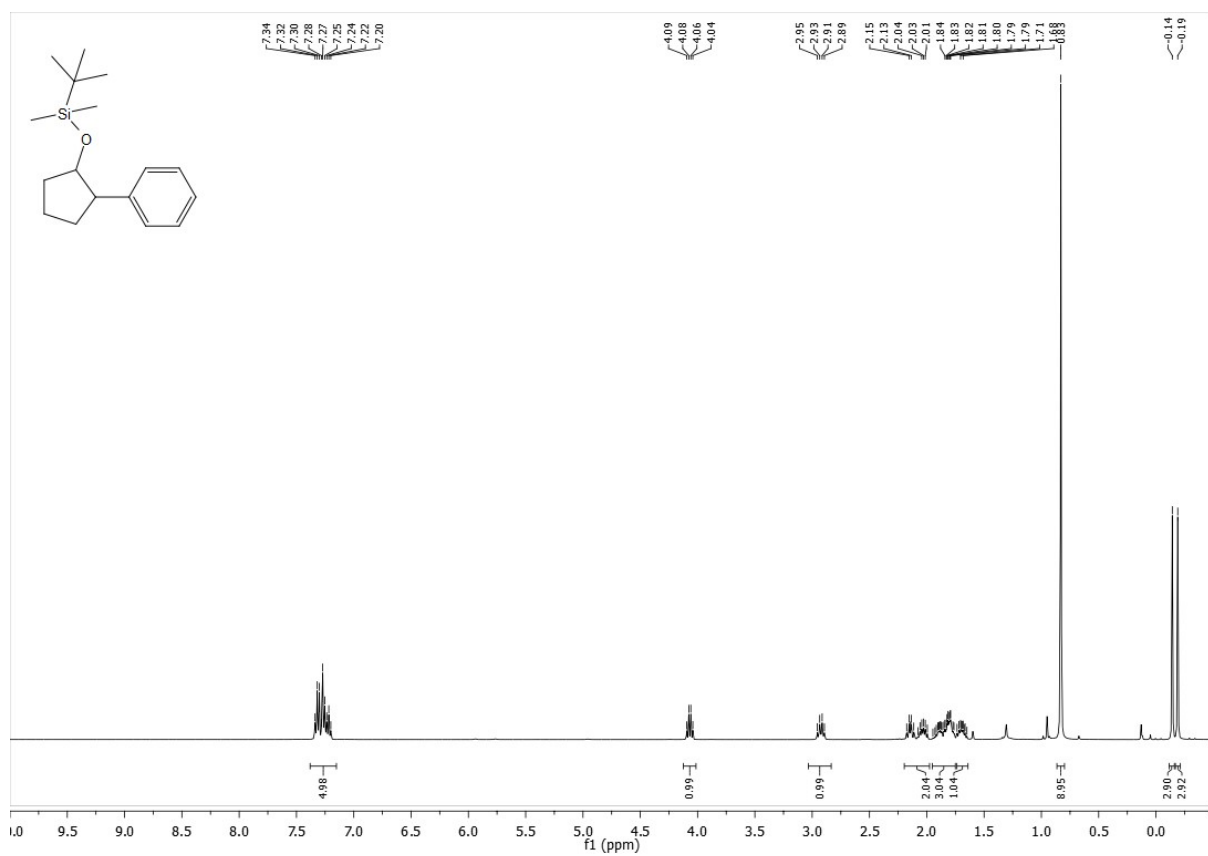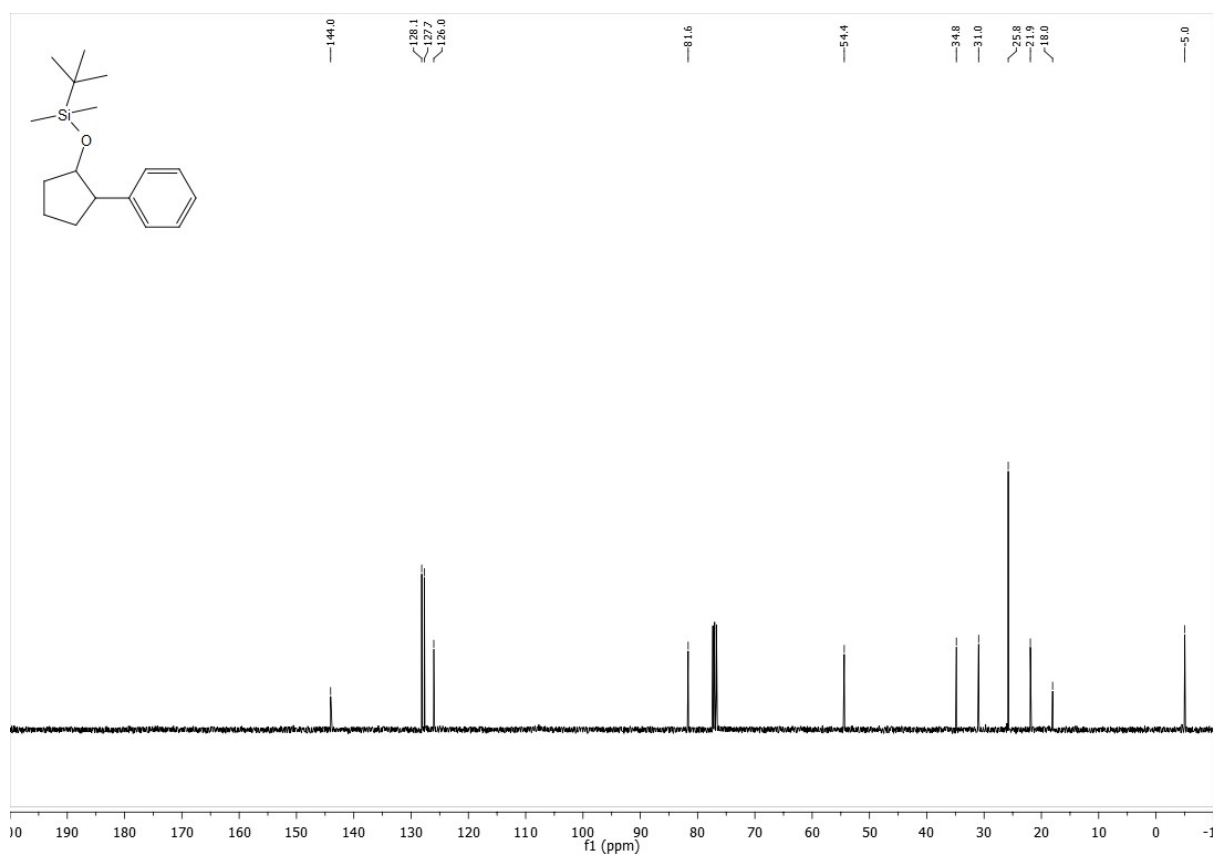

**(3a*S*,4*S*,6*R*,6*aR*)-2,2-dimethyl-4-phenyl-6-vinyltetrahydro-4*H*-cyclopenta[*d*][1,3]dioxole (9a)**

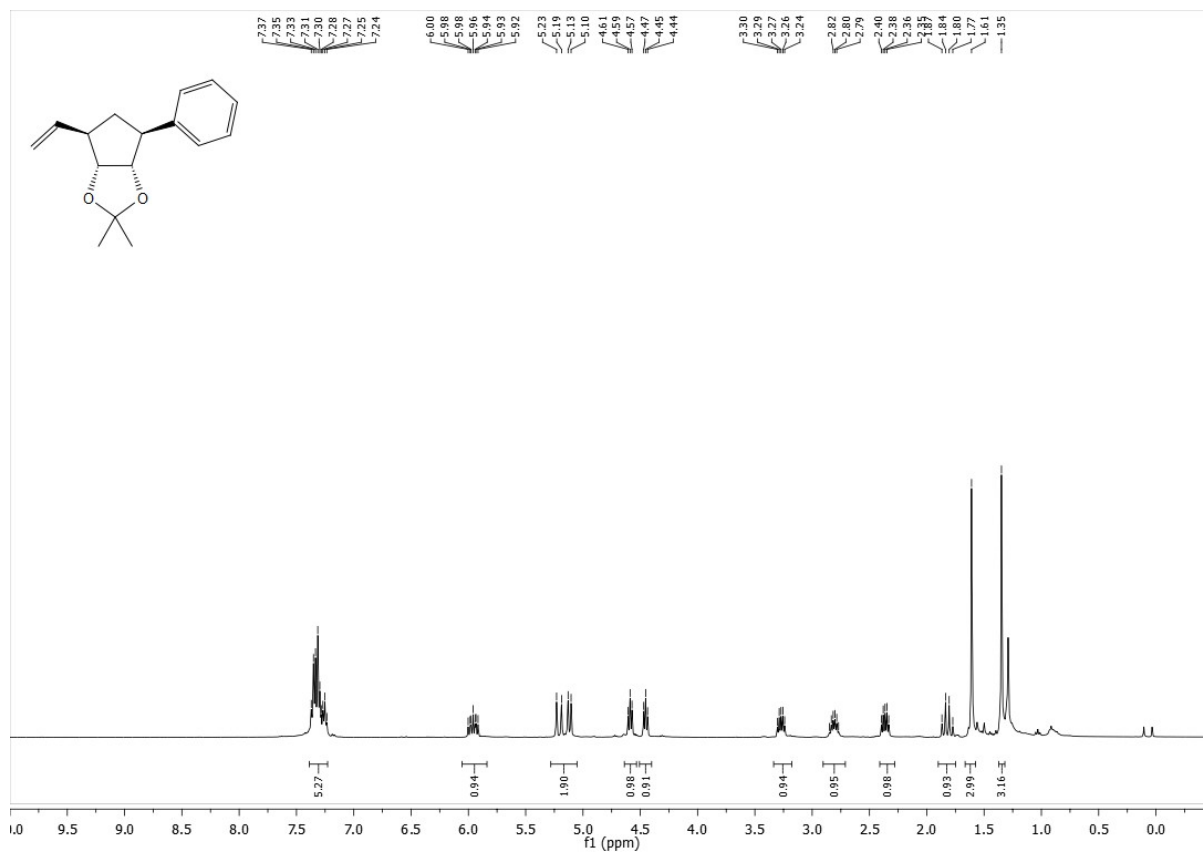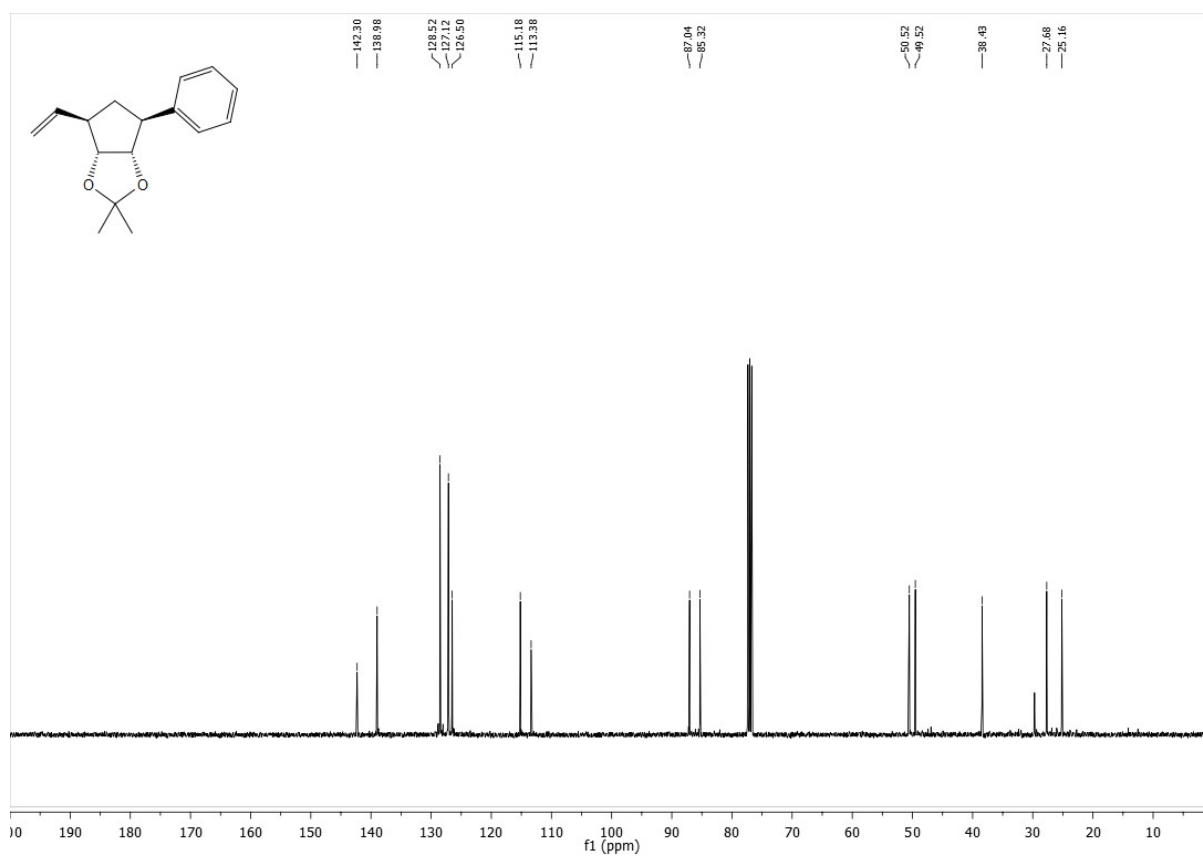

**(3aS,4S,6R,6aR)-4-(4-fluorophenyl)-2,2-dimethyl-6-vinyltetrahydro-4H-cyclopenta[d][1,3]dioxole (9b)**

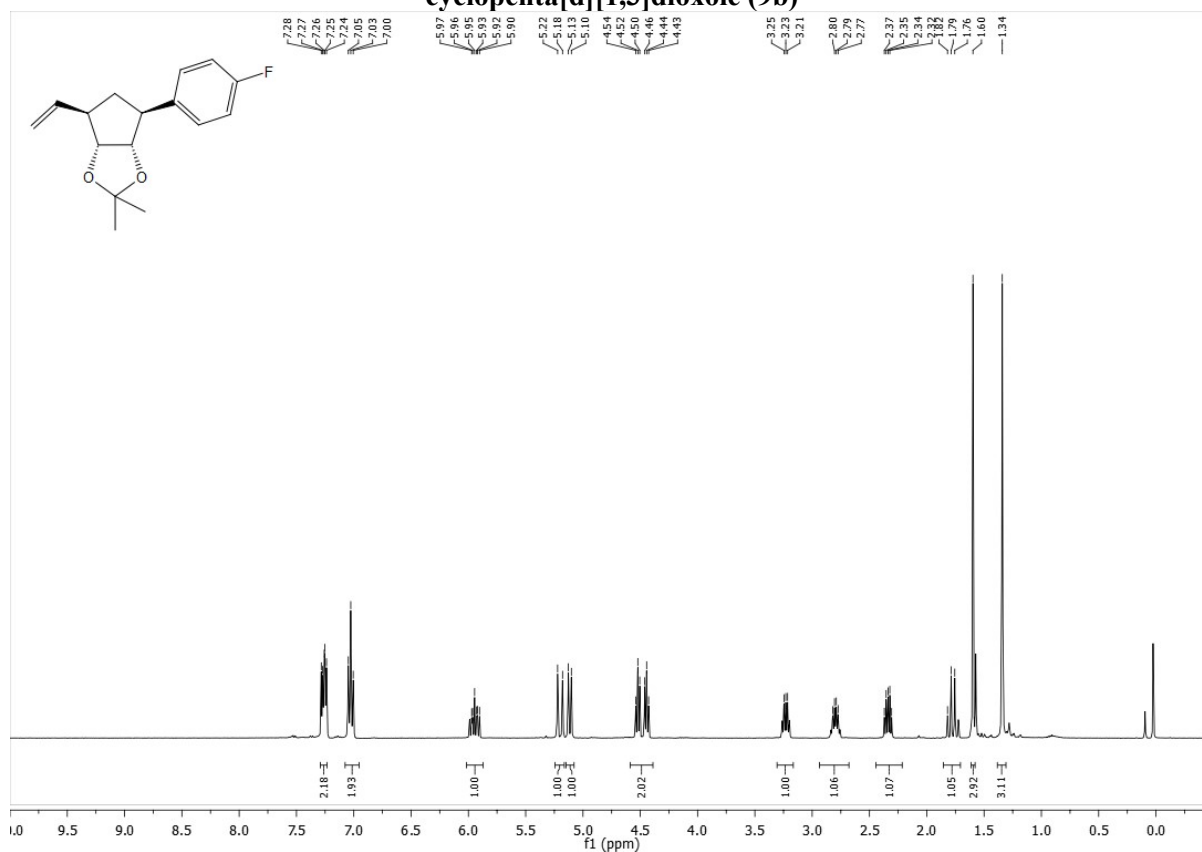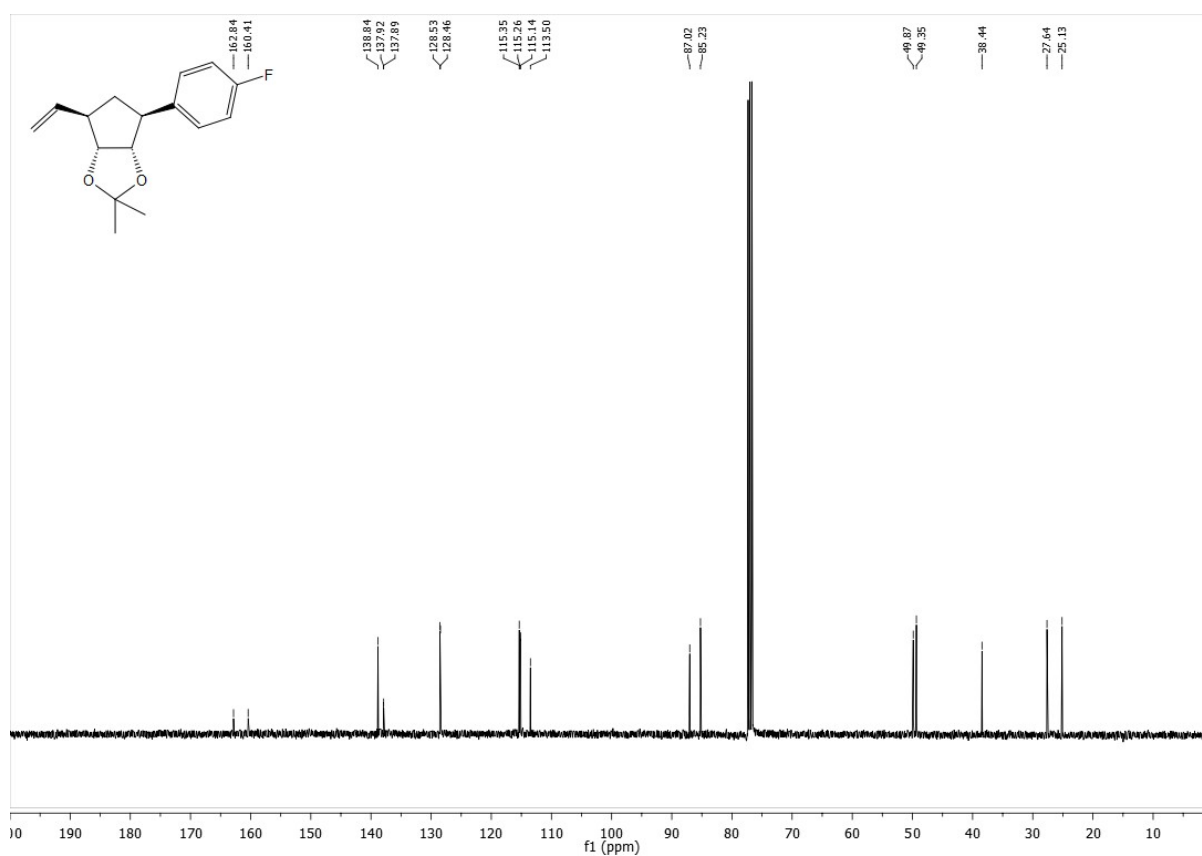

**(3a*S*,4*S*,6*R*,6a*R*)-4-(4-methoxyphenyl)-2,2-dimethyl-6-vinyltetrahydro-4*H*-cyclopenta[*d*][1,3]dioxole (9c)**

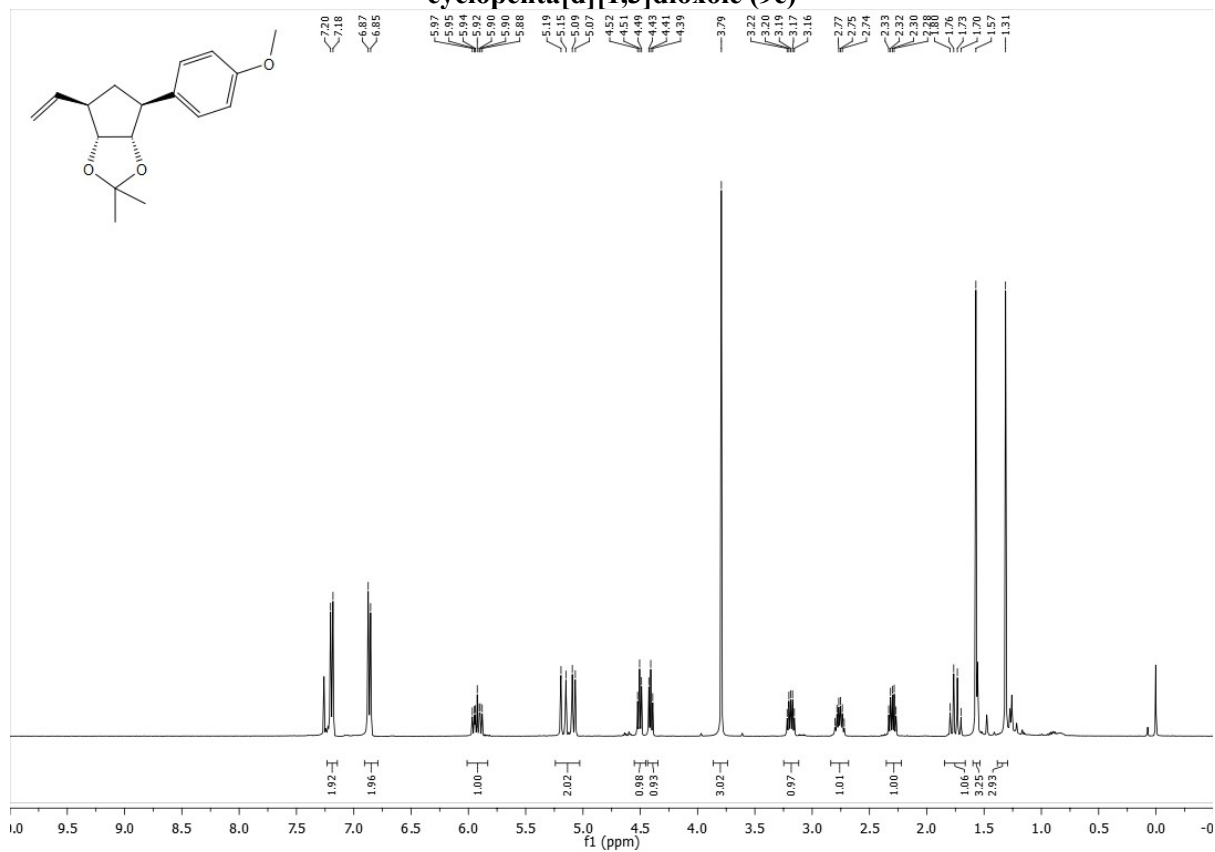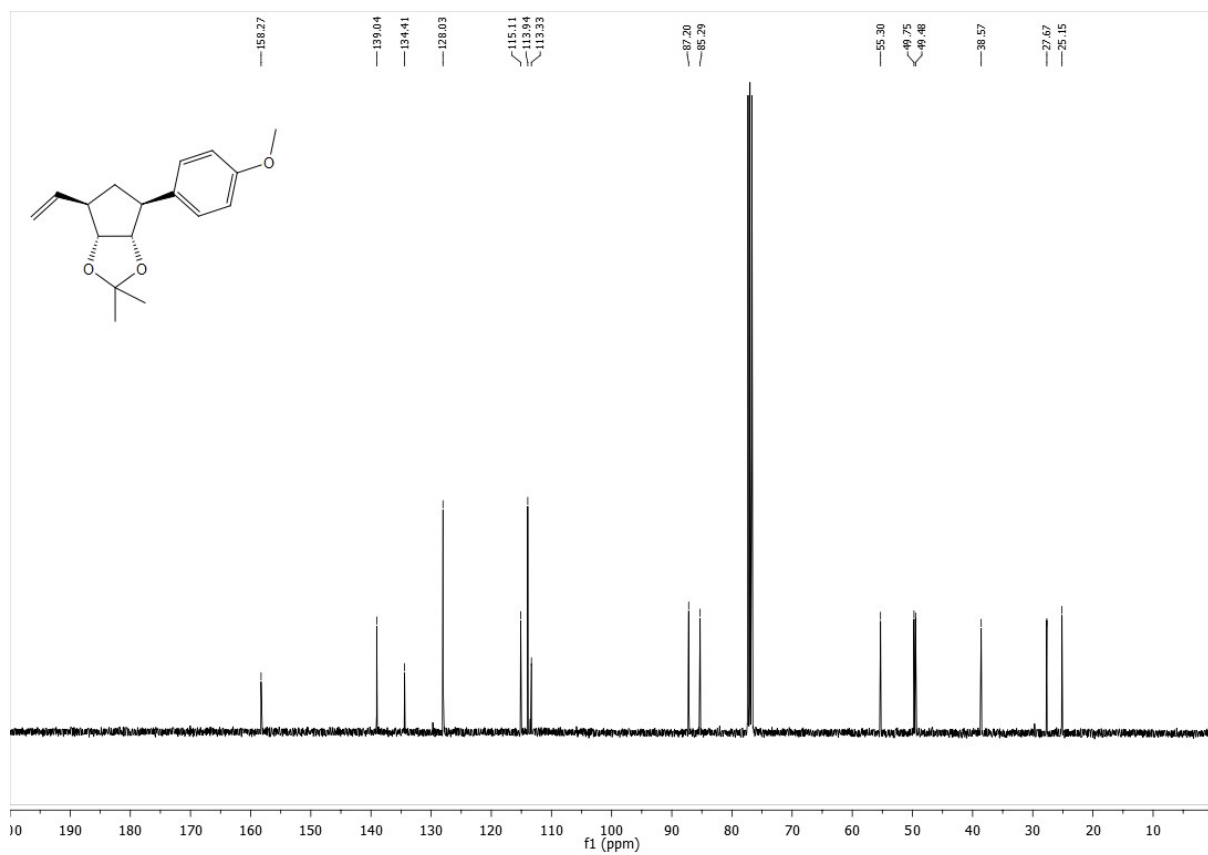

**(3aS,4S,6R,6aR)-2,2-dimethyl-4-(4-(trifluoromethoxy)phenyl)-6-vinyltetrahydro-4H-cyclopenta[d][1,3]dioxole (9d)**

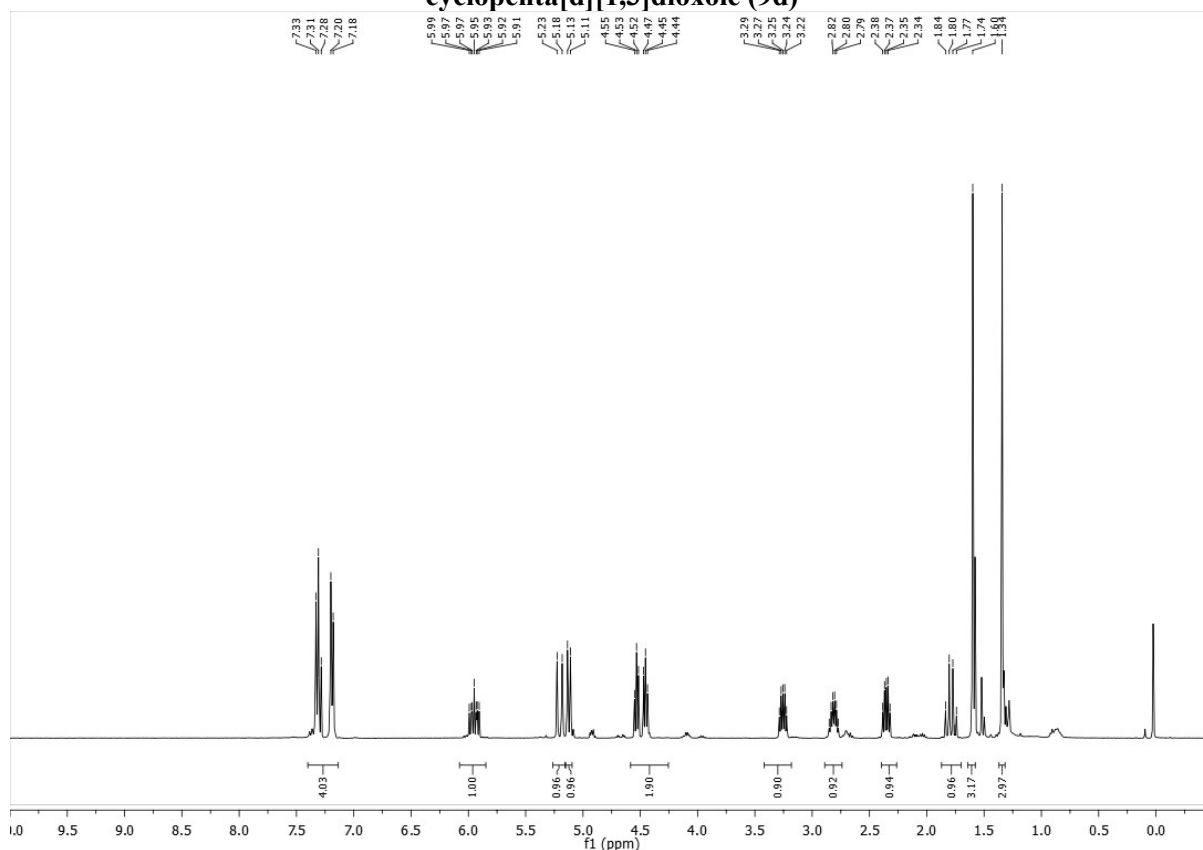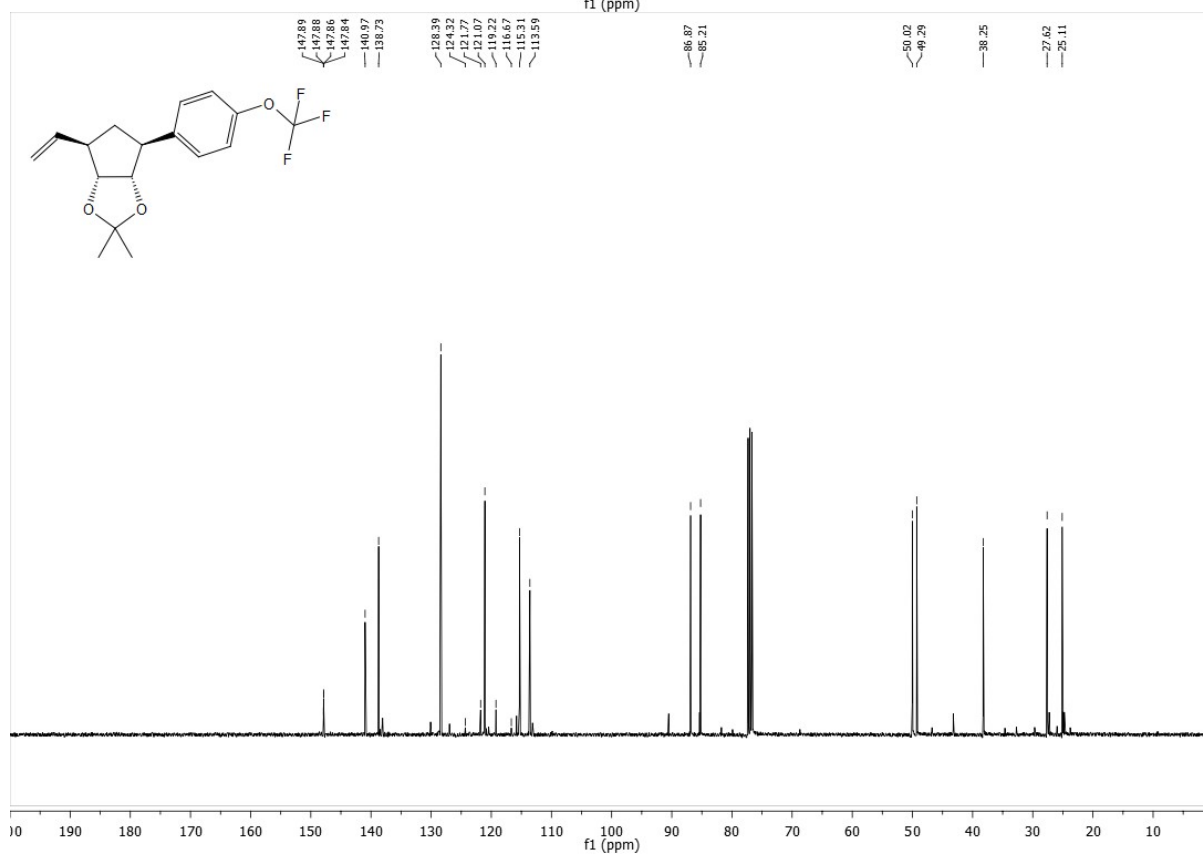

3-((3a*S*,4*S*,6*R*,6a*R*)-2,2-dimethyl-6-vinyltetrahydro-4*H*-cyclopenta[*d*][1,3]dioxol-4-yl)-2-methylpyridine (9e)

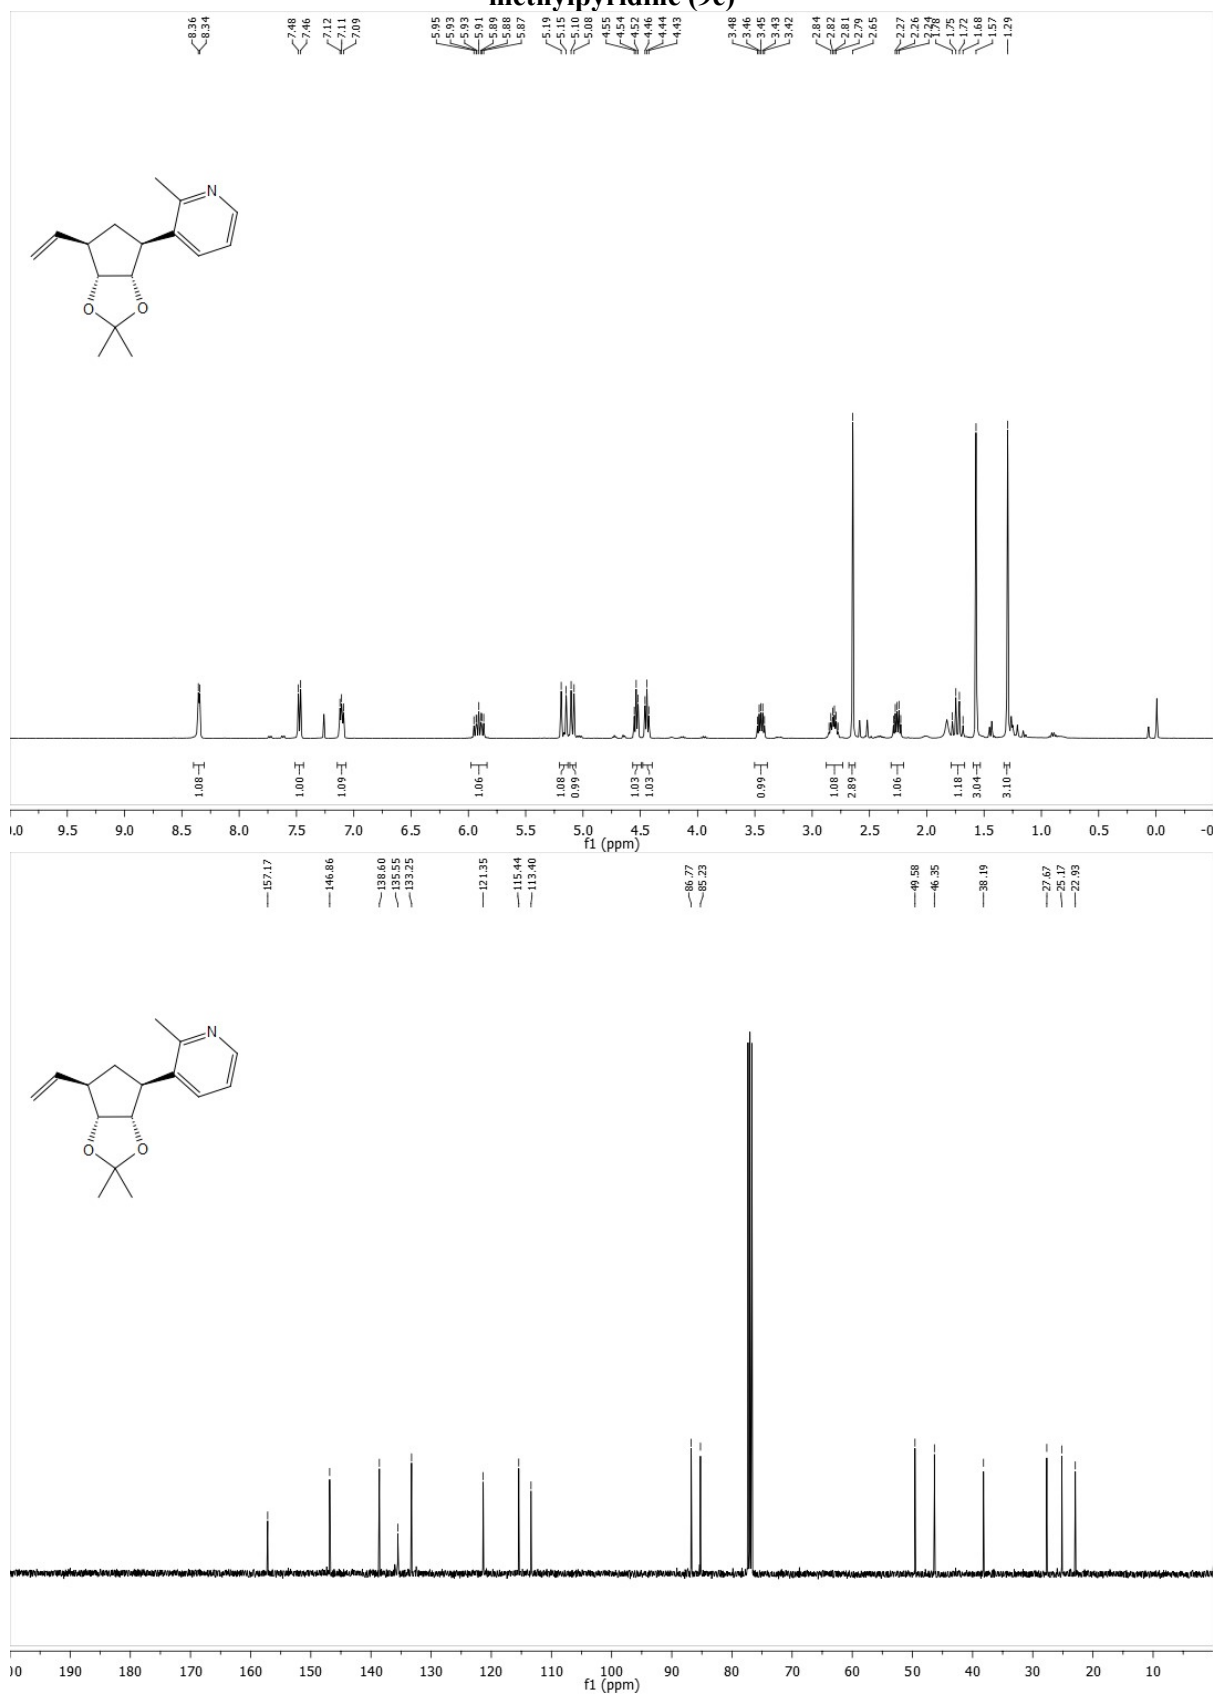

(3*S*,4*S*,6*R*,6*aR*)-2,2-dimethyl-4-(naphthalen-2-yl)-6-vinyltetrahydro-4*H*-cyclopenta[*d*][1,3]dioxole (9f)

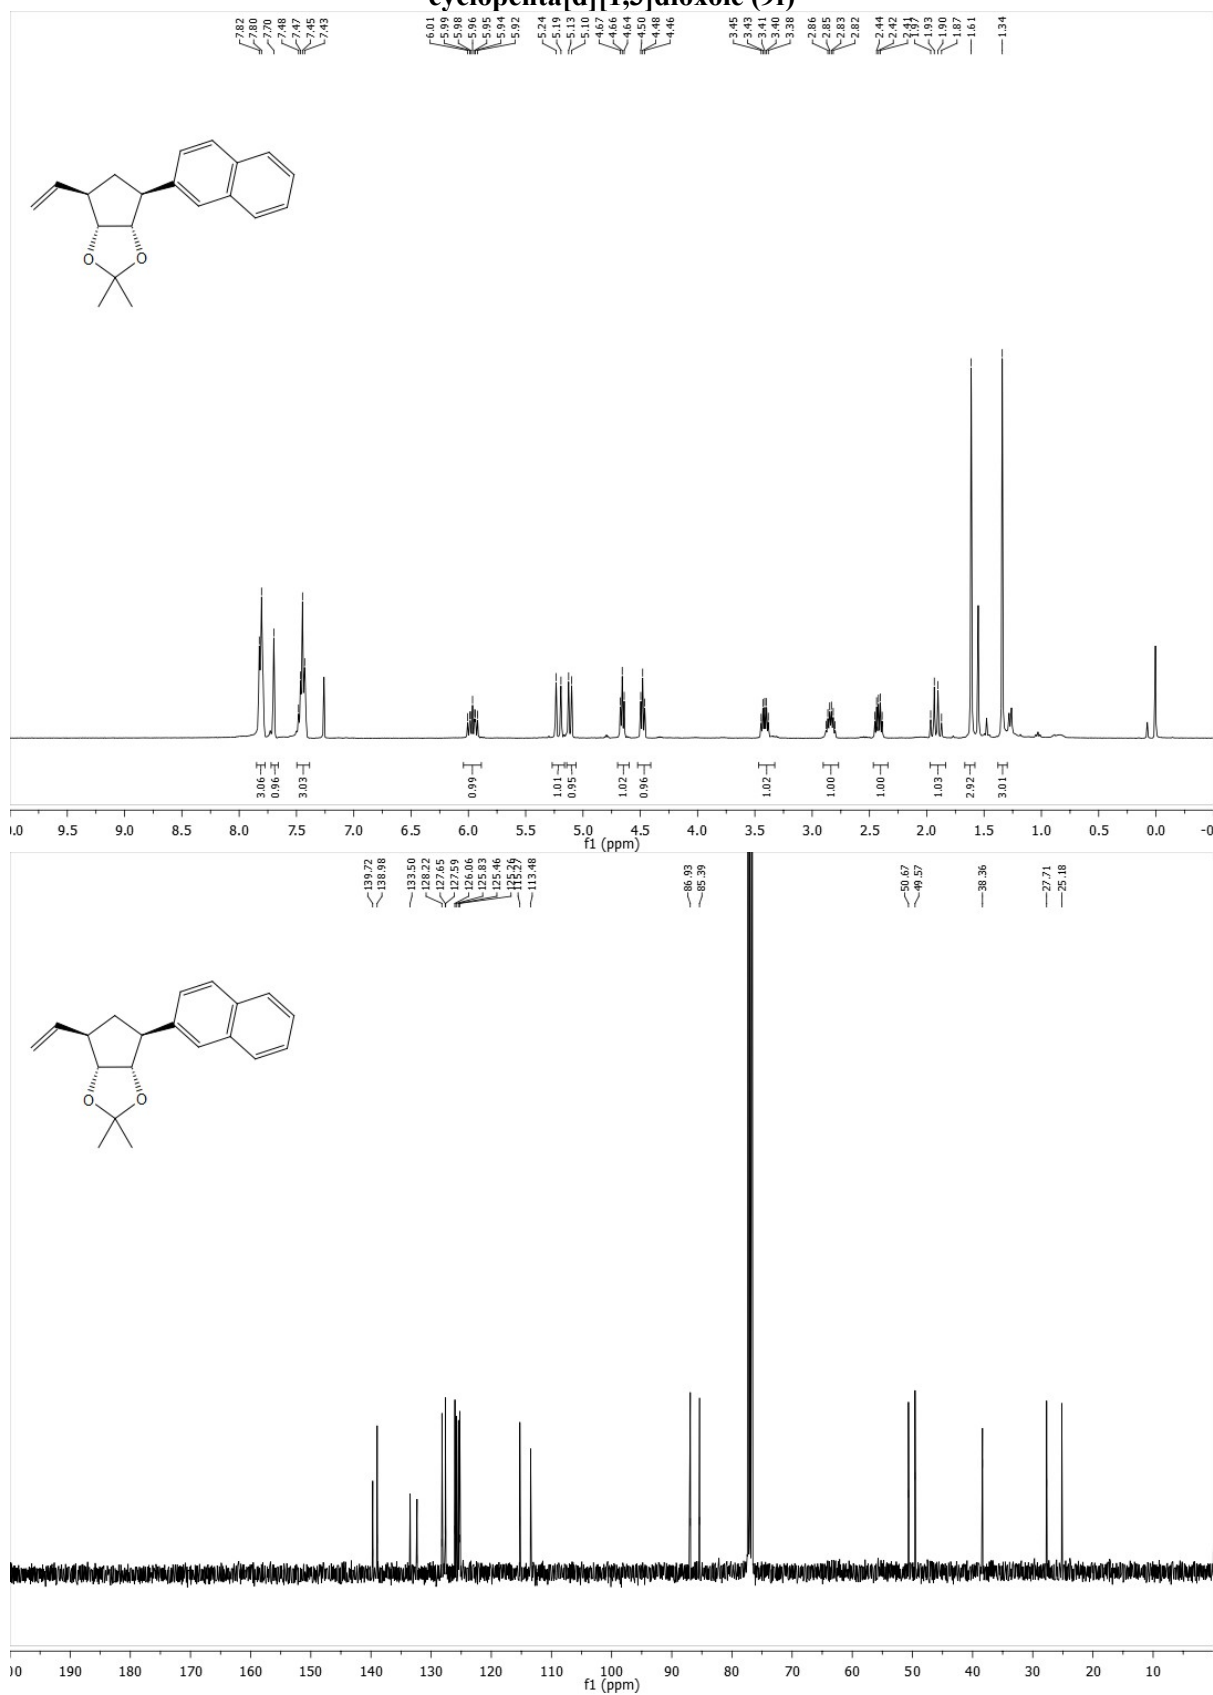



**(3*S*,4*S*,6*R*,6*aR*)-4-(3-methoxynaphthalen-2-yl)-2,2-dimethyl-6-vinyltetrahydro-4*H*-cyclopenta[*d*][1,3]dioxole (9*g*)**

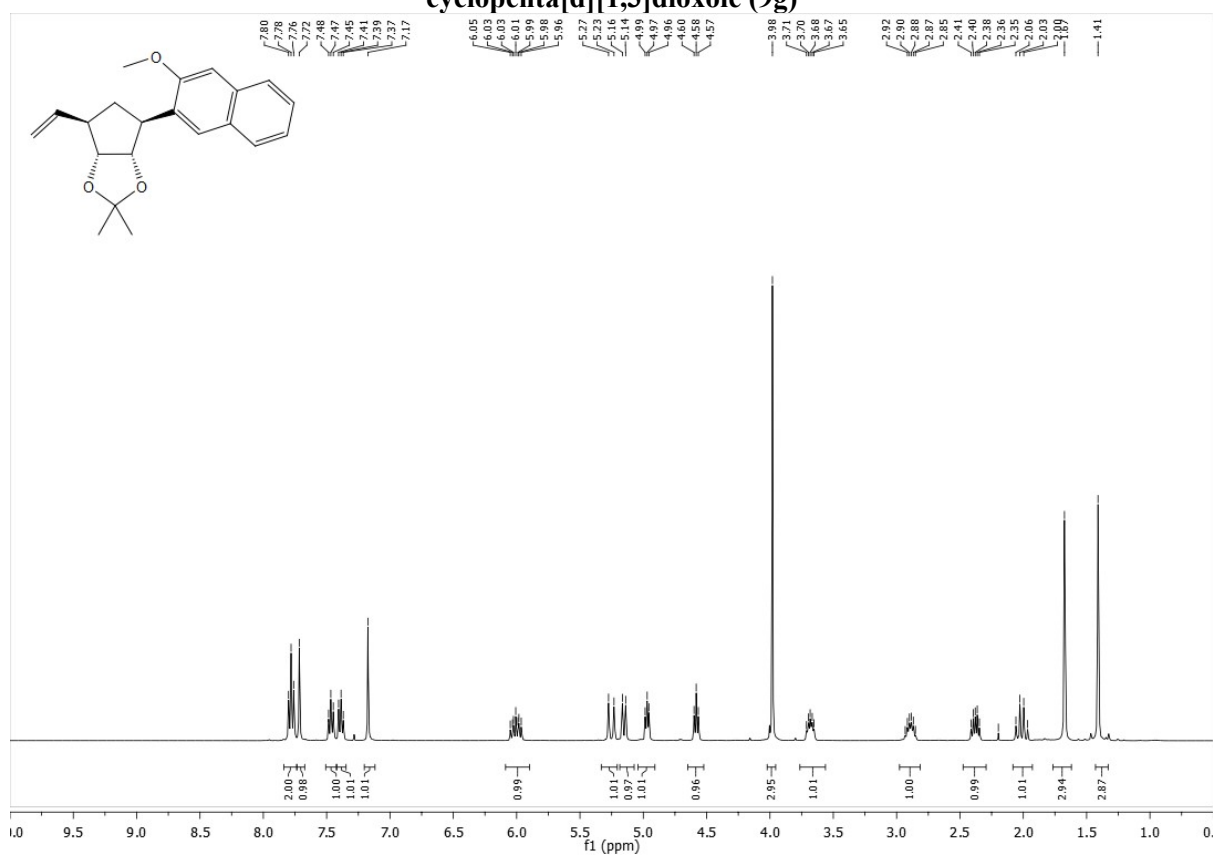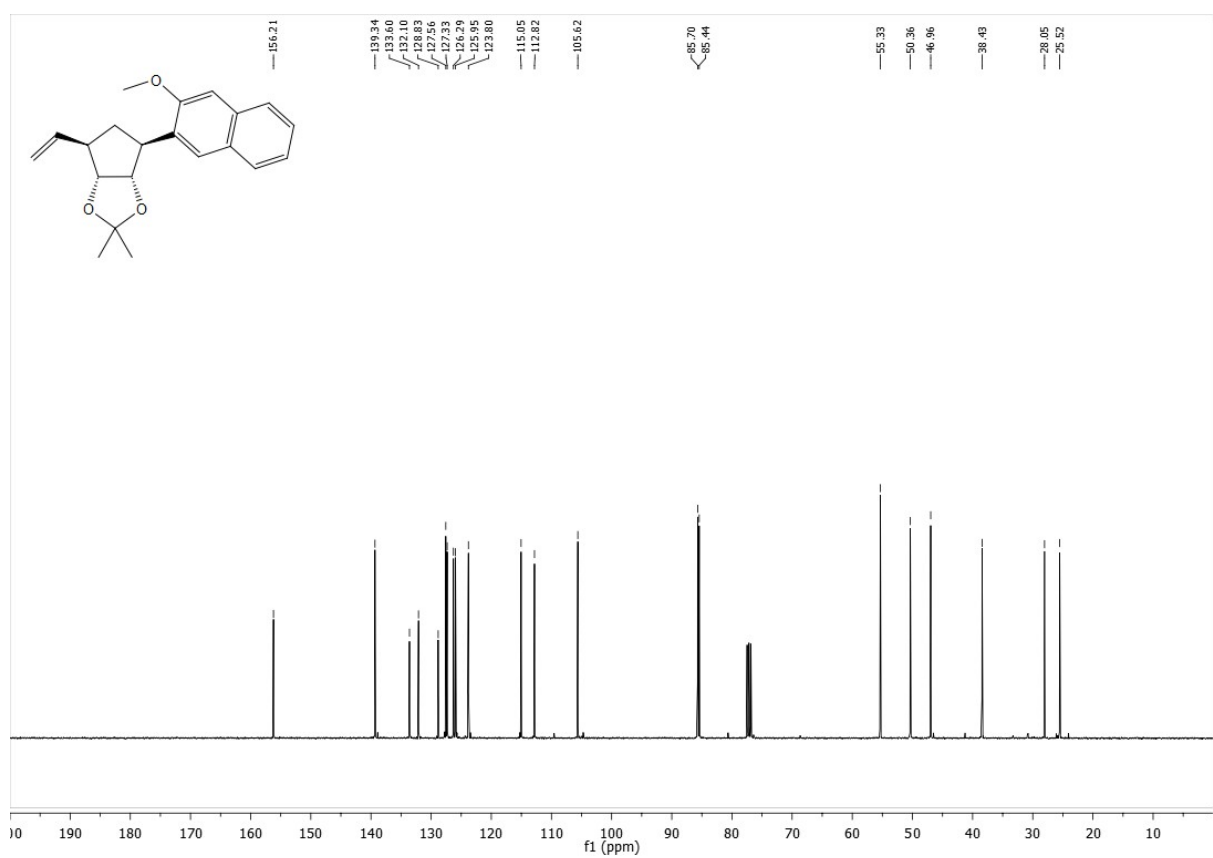

**(3*S*,4*S*,6*R*,6*aR*)-2,2-dimethyl-4-(naphthalen-1-yl)-6-vinyltetrahydro-4*H*-cyclopenta[*d*][1,3]dioxole (9h)**

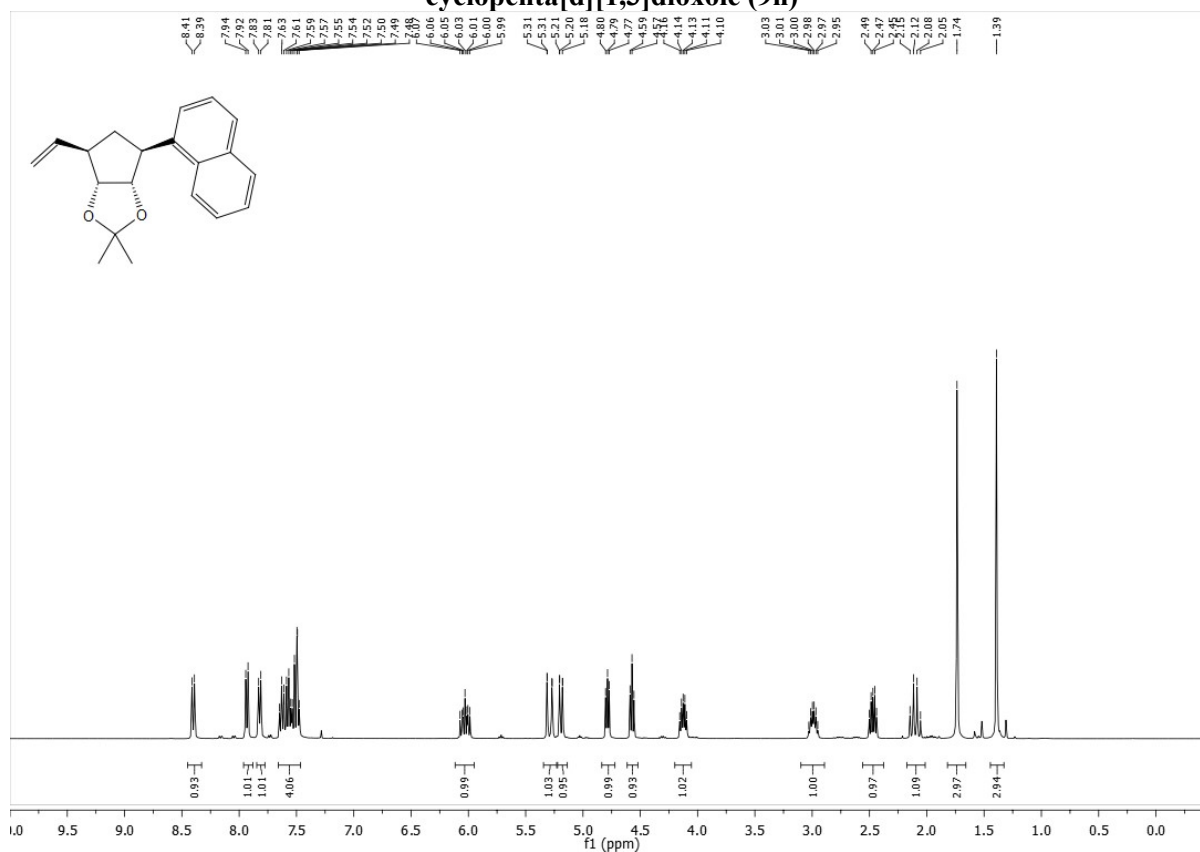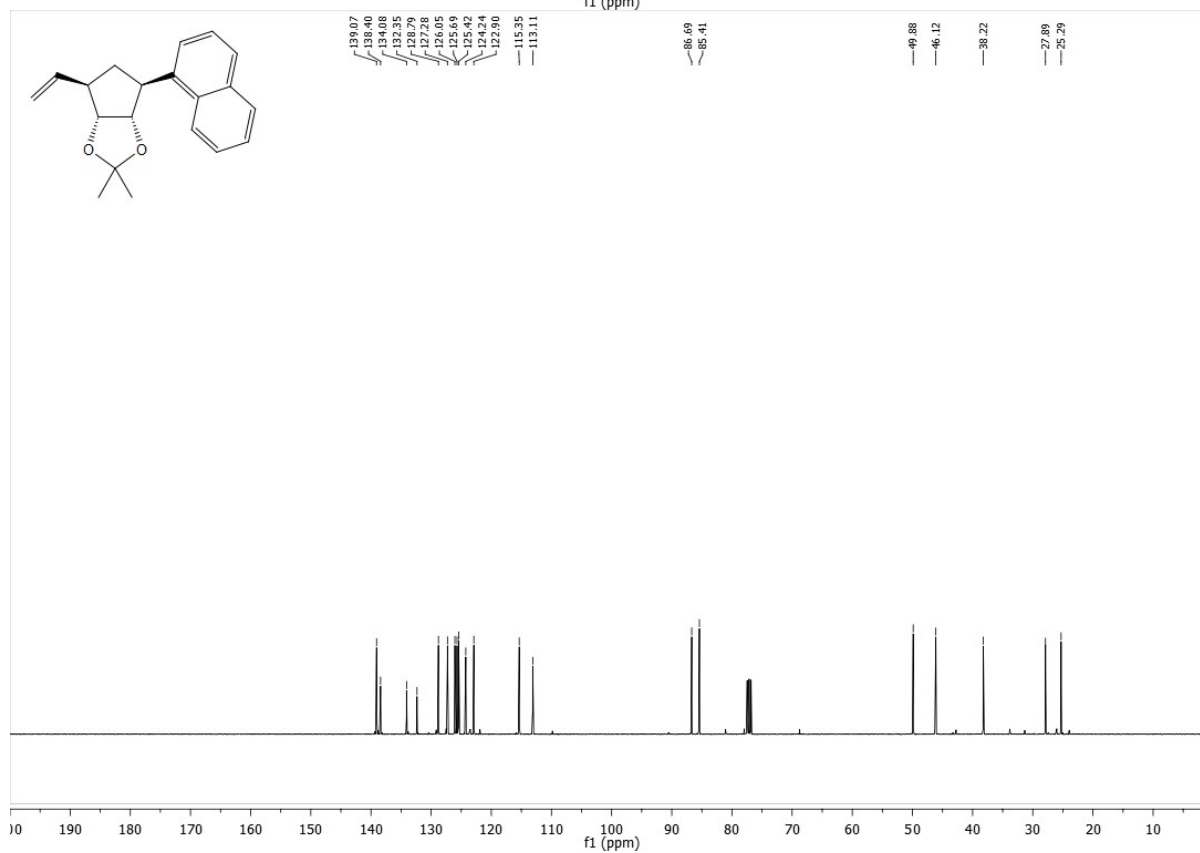

**(3*S*,4*S*,6*R*,6*aR*)-4-(2,4-difluoro-5-methylphenyl)-2,2-dimethyl-6-vinyltetrahydro-4*H*-cyclopenta[*d*][1,3]dioxole (9i)**

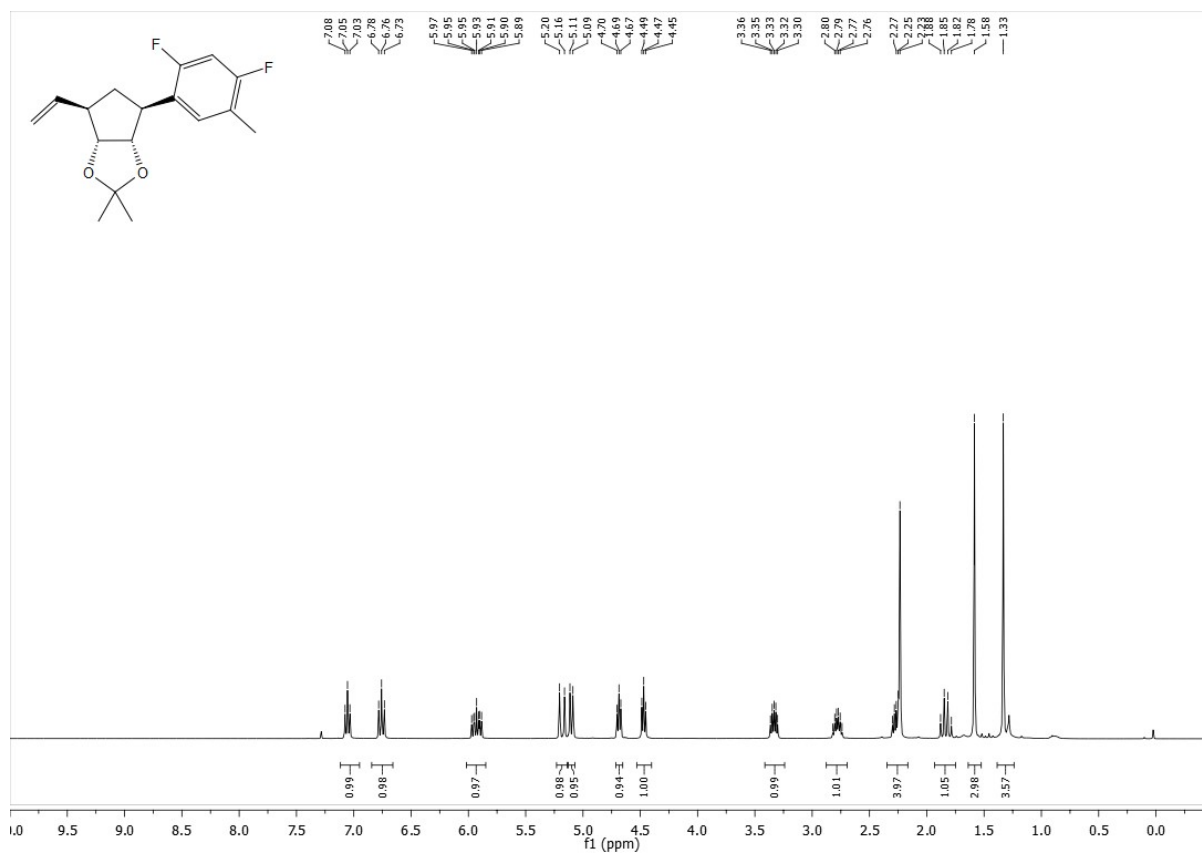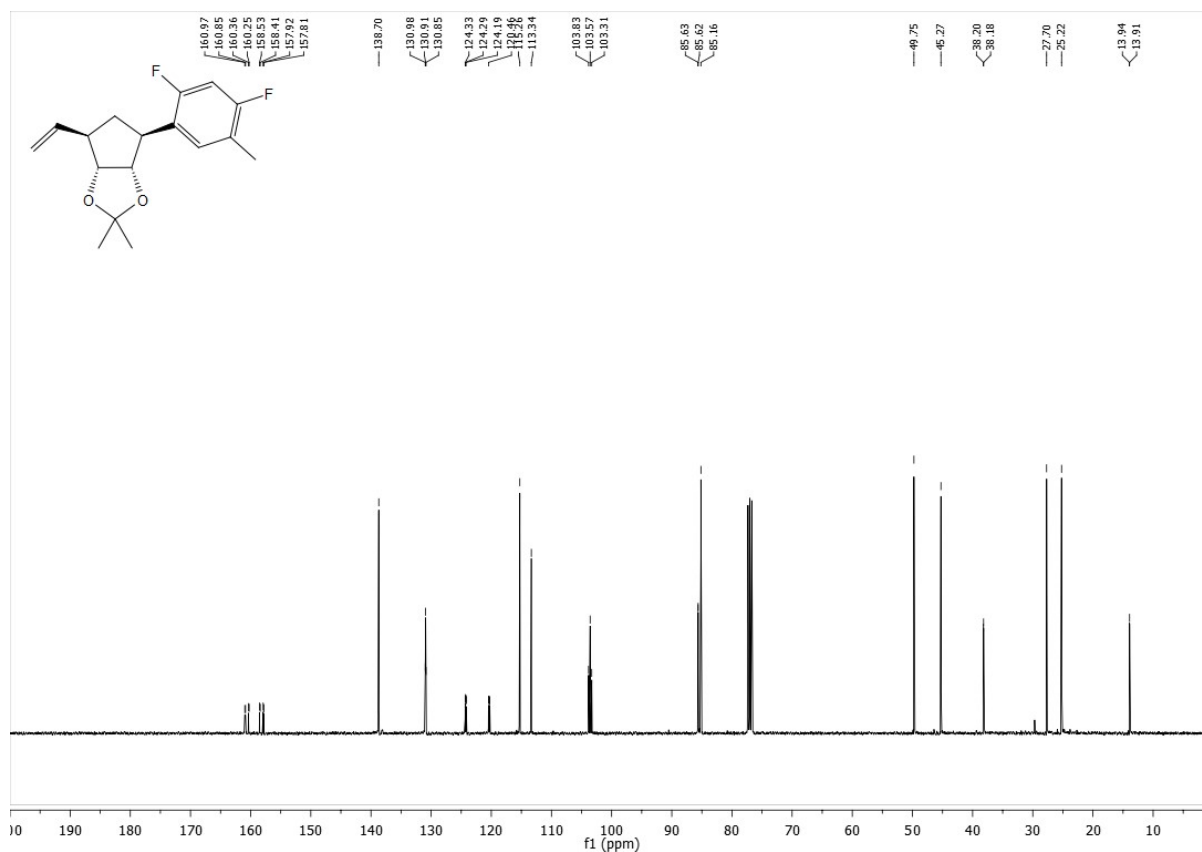

**3-((3*S*,4*S*,6*R*,6*aR*)-2,2-dimethyl-6-vinyltetrahydro-4*H*-cyclopenta[*d*][1,3]dioxol-4-yl)pyridine (9j)**

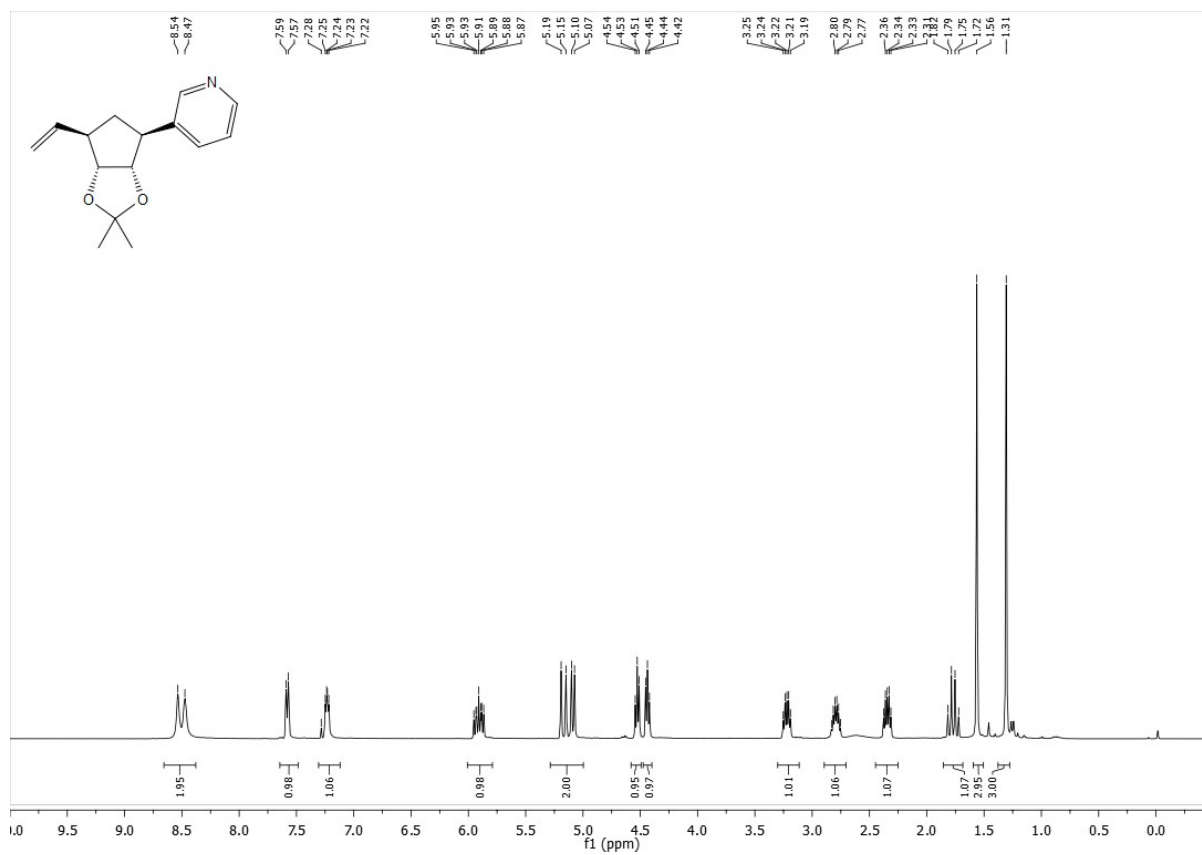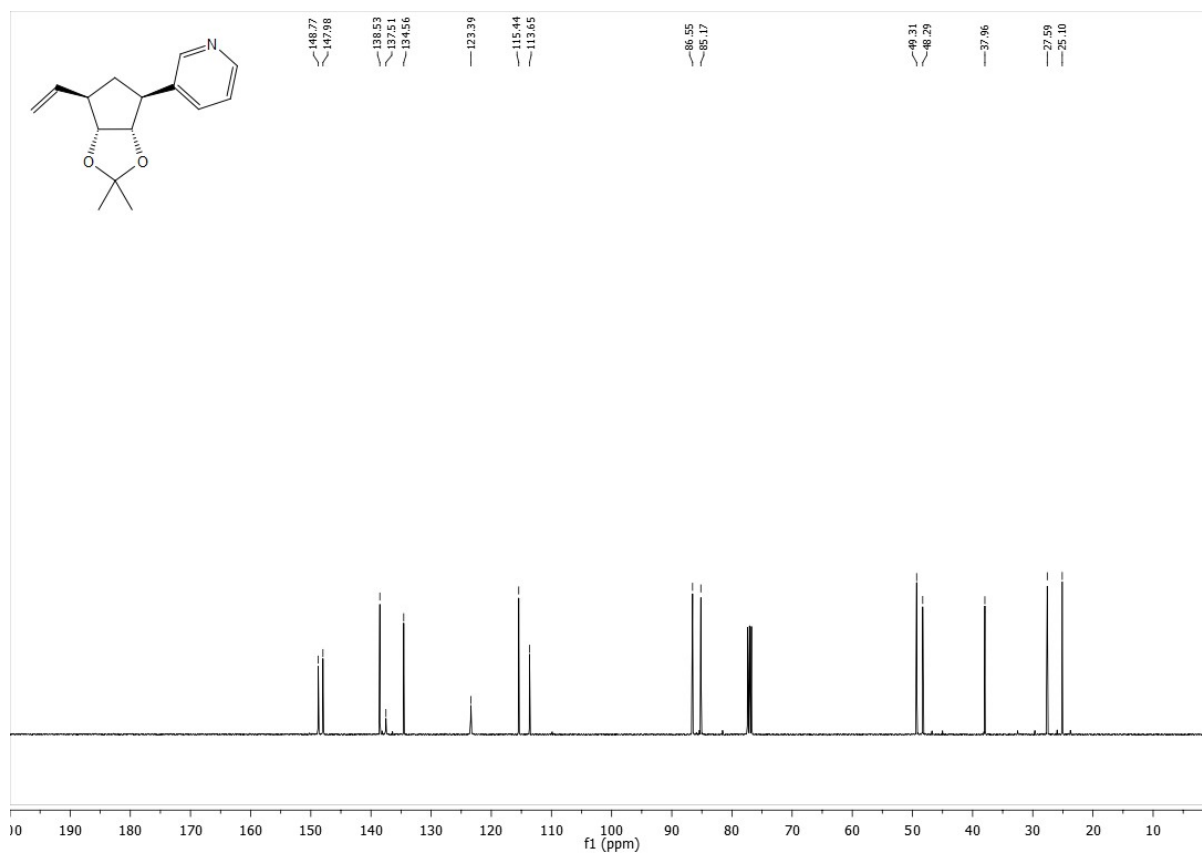



**5-((3a*S*,4*S*,6*R*,6a*R*)-2,2-dimethyl-6-vinyltetrahydro-4*H*-cyclopenta[*d*][1,3]dioxol-4-yl)-2-fluoropyridine (9k)**

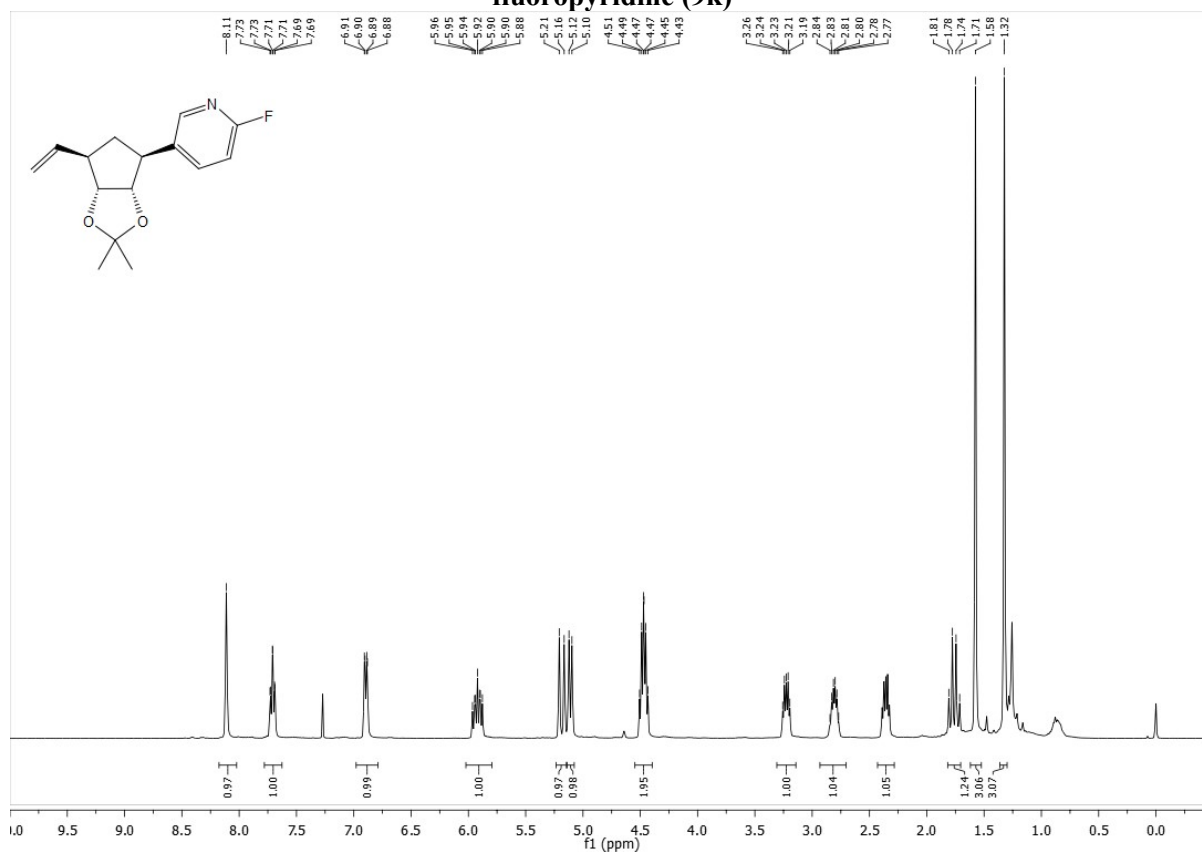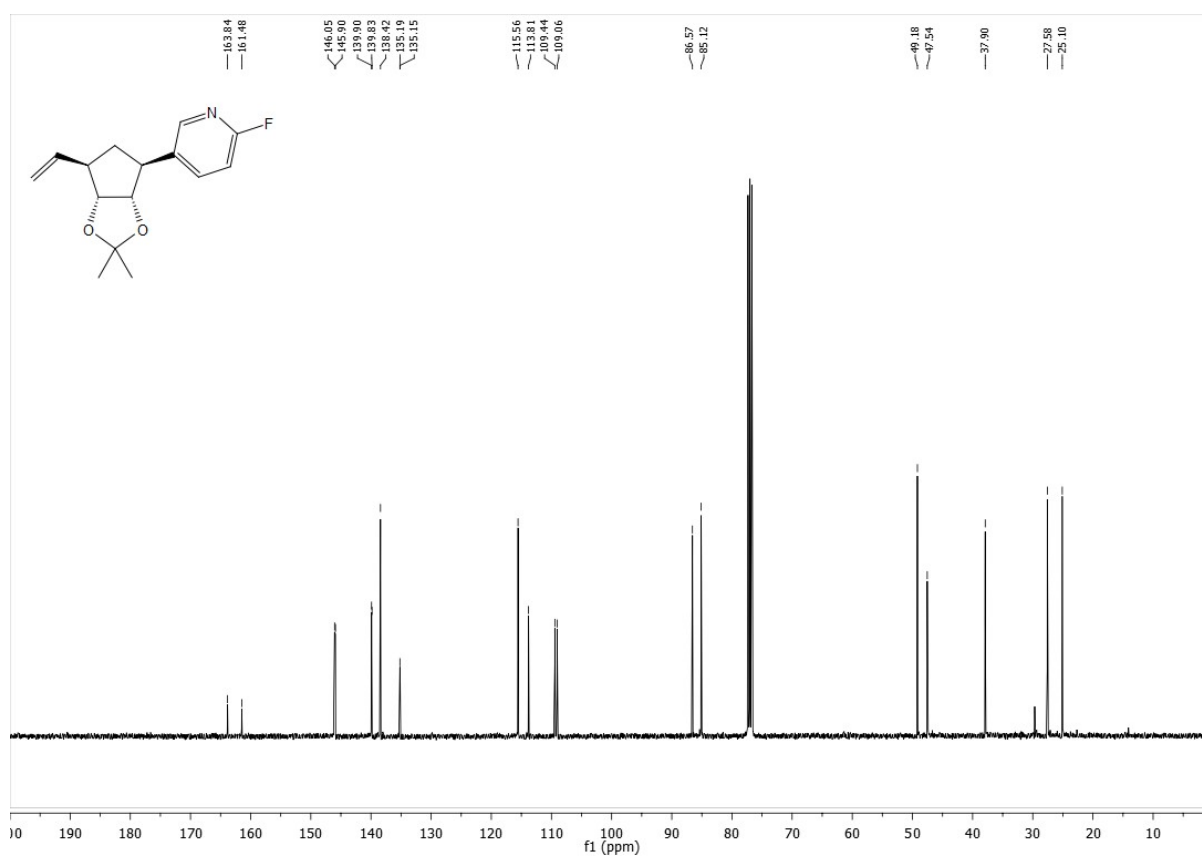

4-((3*S*,4*S*,6*R*,6*R*)-2,2-dimethyl-6-vinyltetrahydro-4*H*-cyclopenta[*d*][1,3]dioxol-4-yl)benzonitrile (9l)

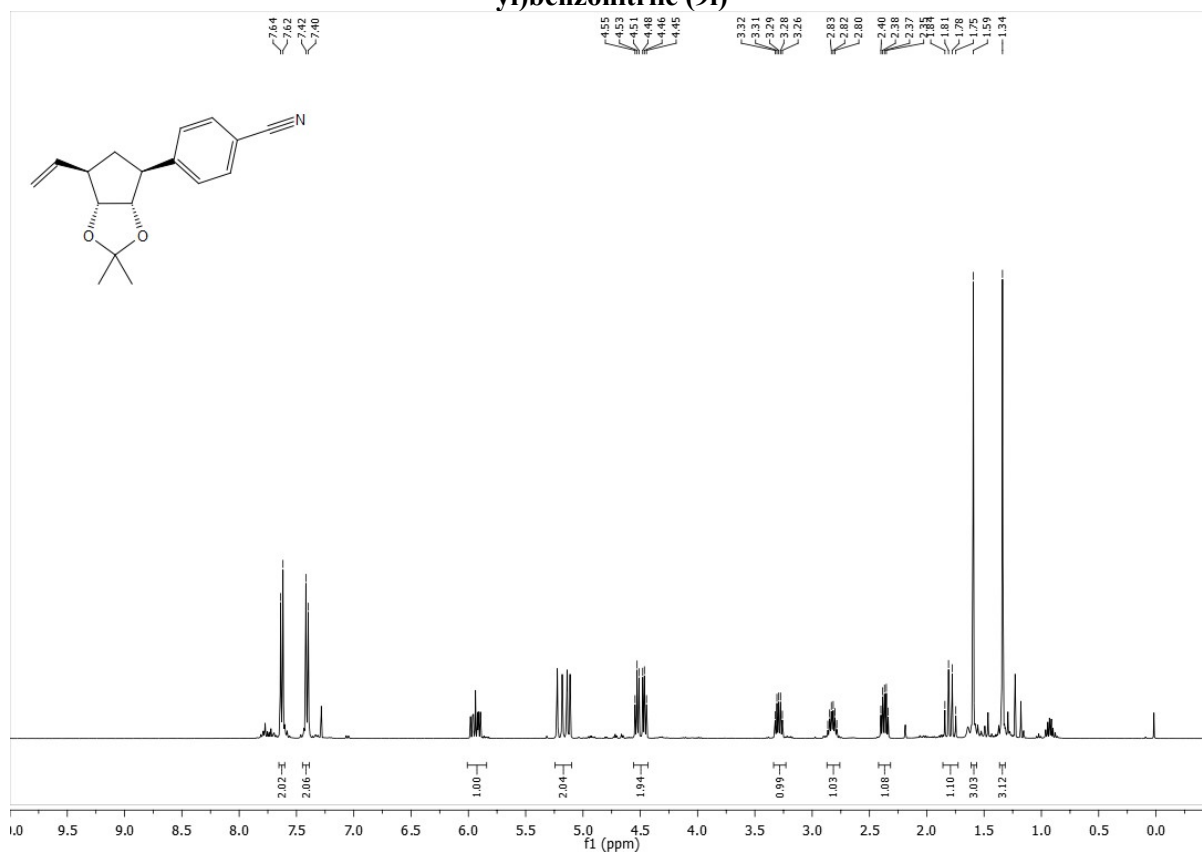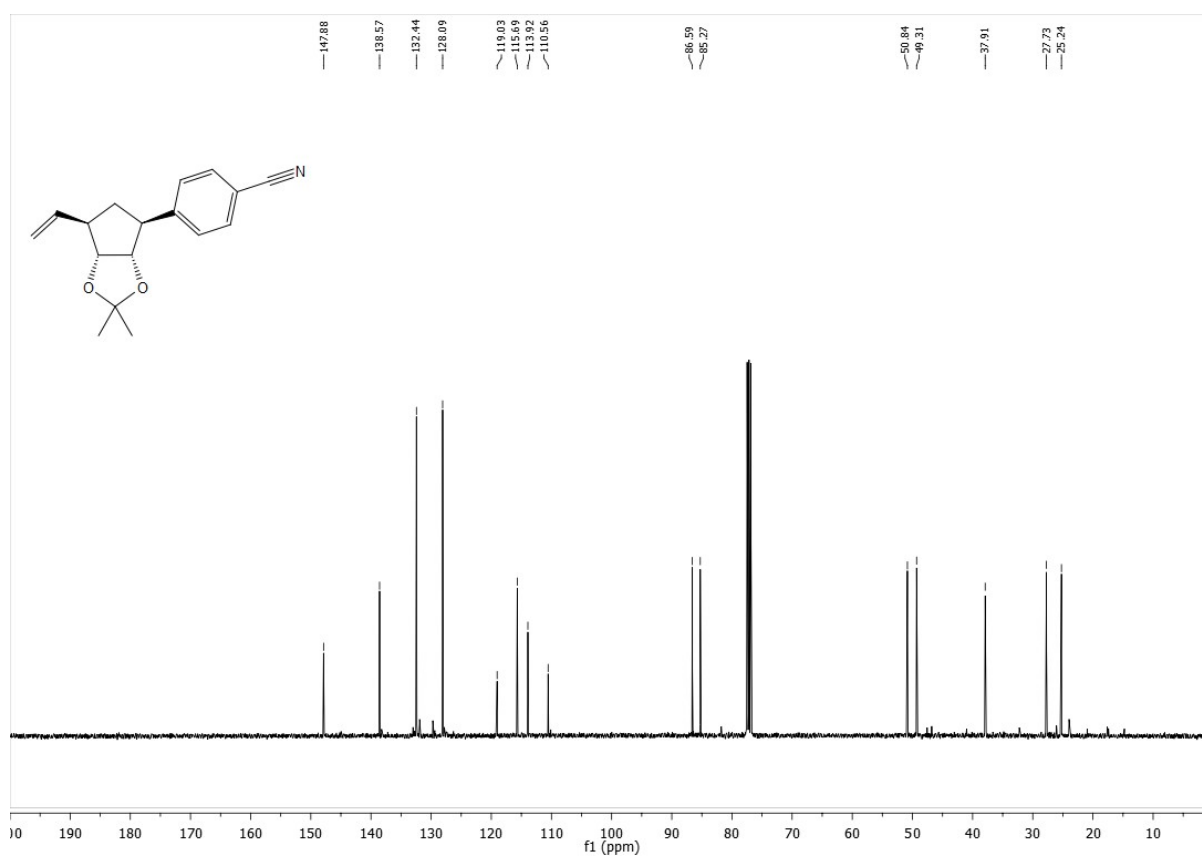

**((3aR,4R,6S,6aS)-2,2-dimethyl-6-phenyltetrahydro-4H-cyclopenta[d][1,3]dioxol-4-yl)methanol**  
**(10a)**

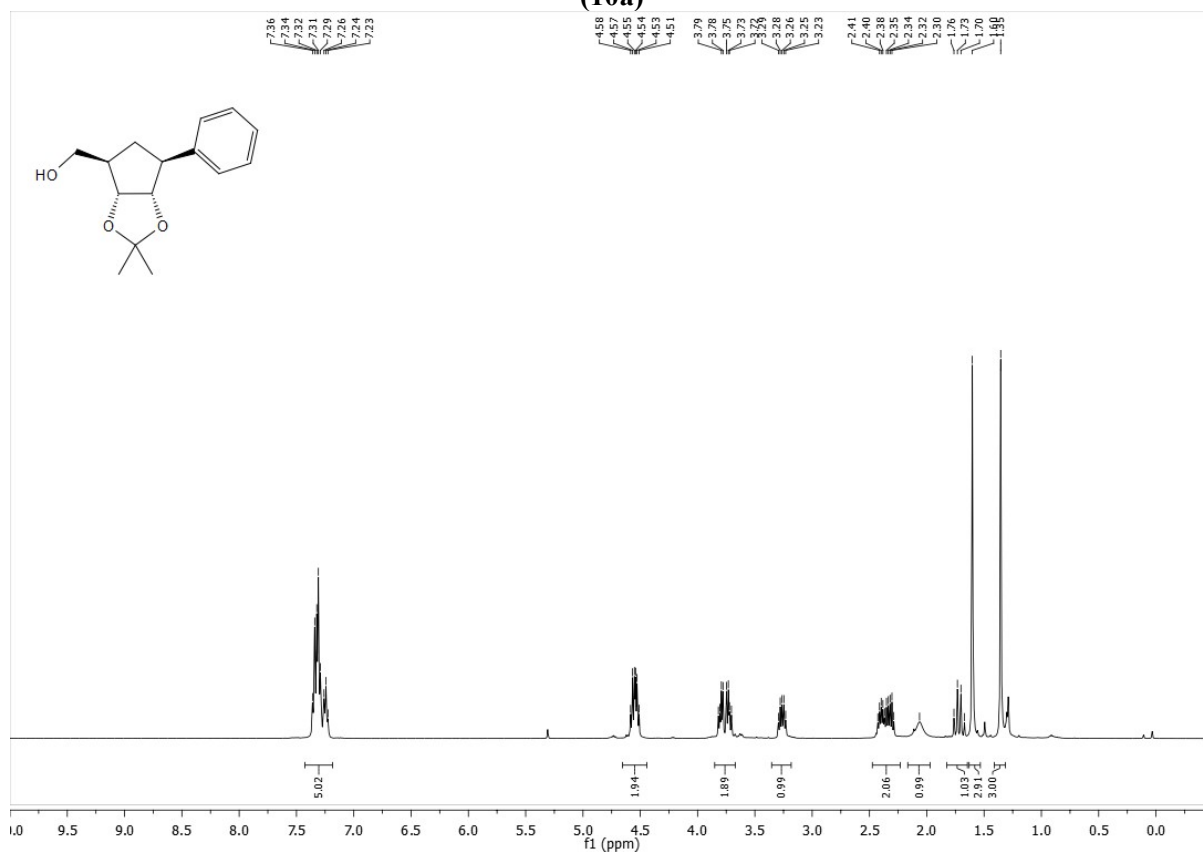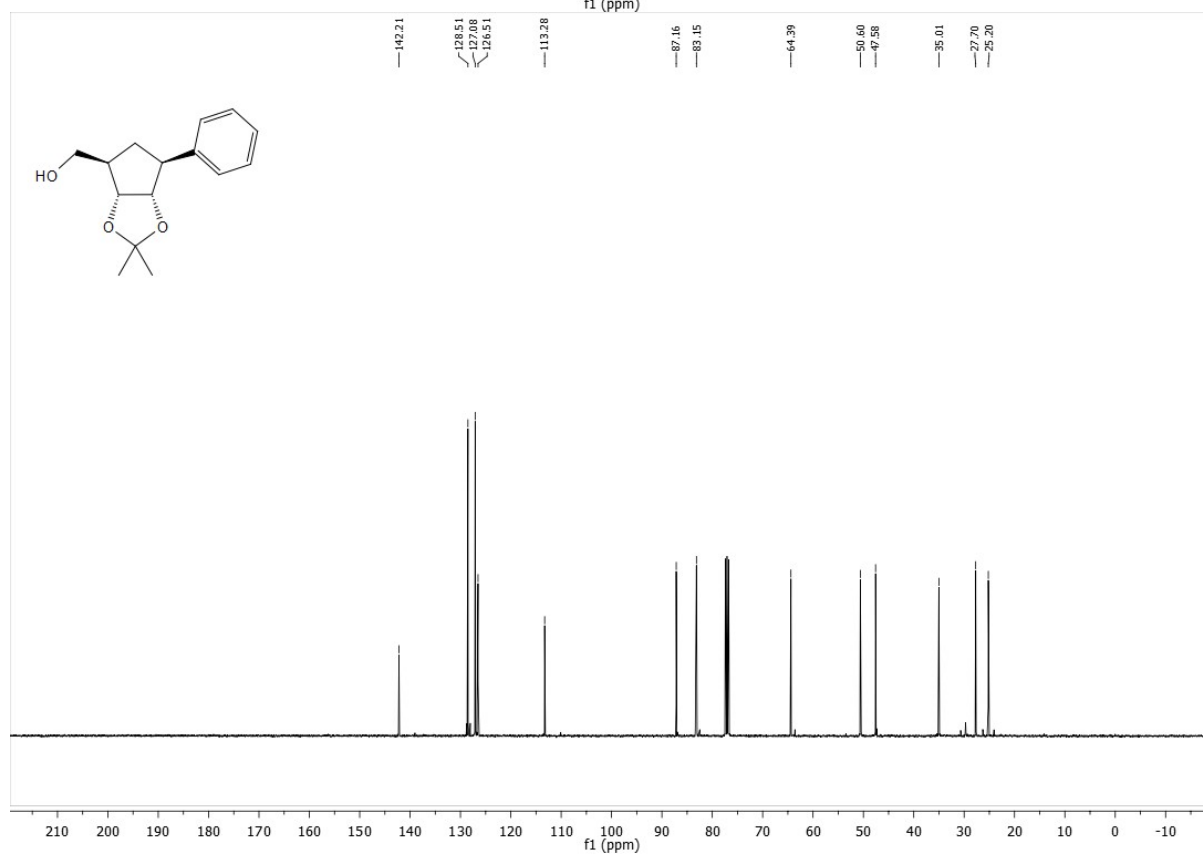



**((3aR,4R,6S,6aS)-6-(4-fluorophenyl)-2,2-dimethyltetrahydro-4H-cyclopenta[d][1,3]dioxol-4-yl)methanol (10b)**

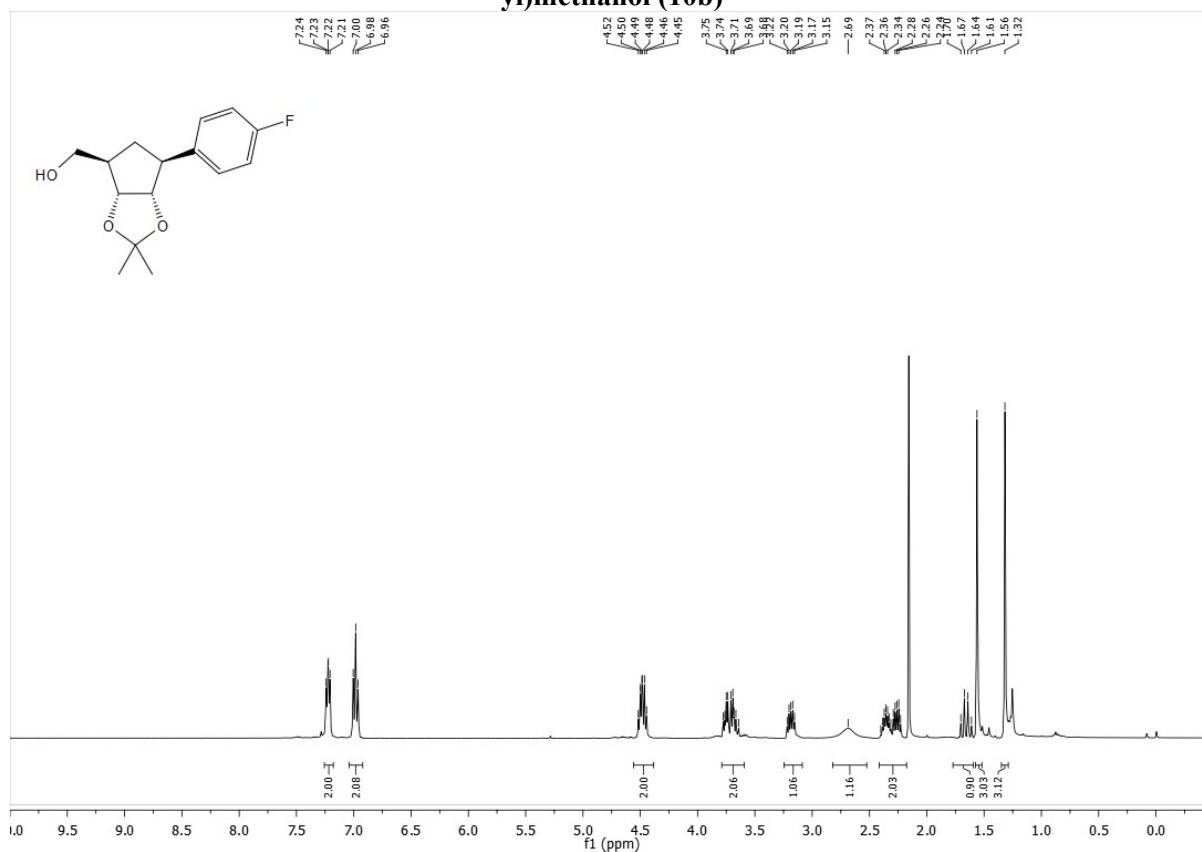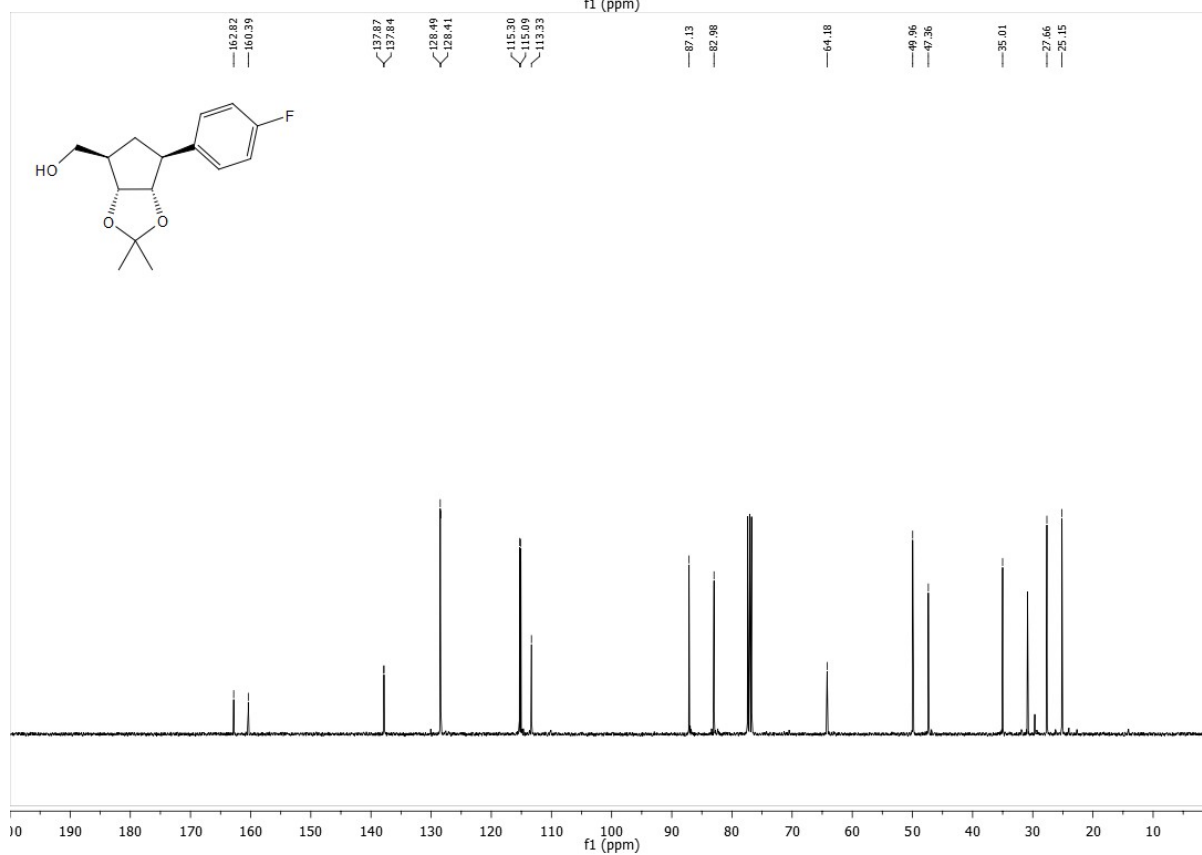

**((3aR,4R,6S,6aS)-6-(4-methoxyphenyl)-2,2-dimethyltetrahydro-4H-cyclopenta[d][1,3]dioxol-4-yl)methanol (10c)**

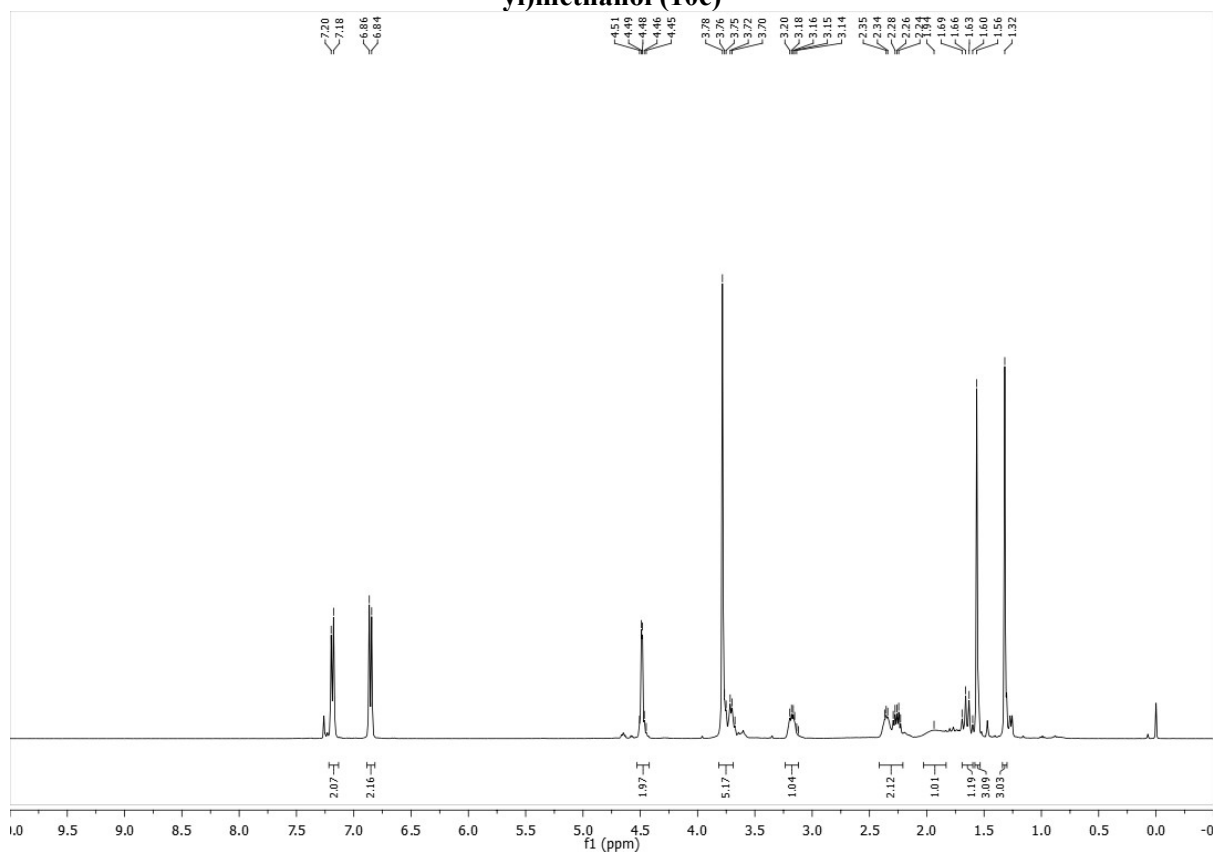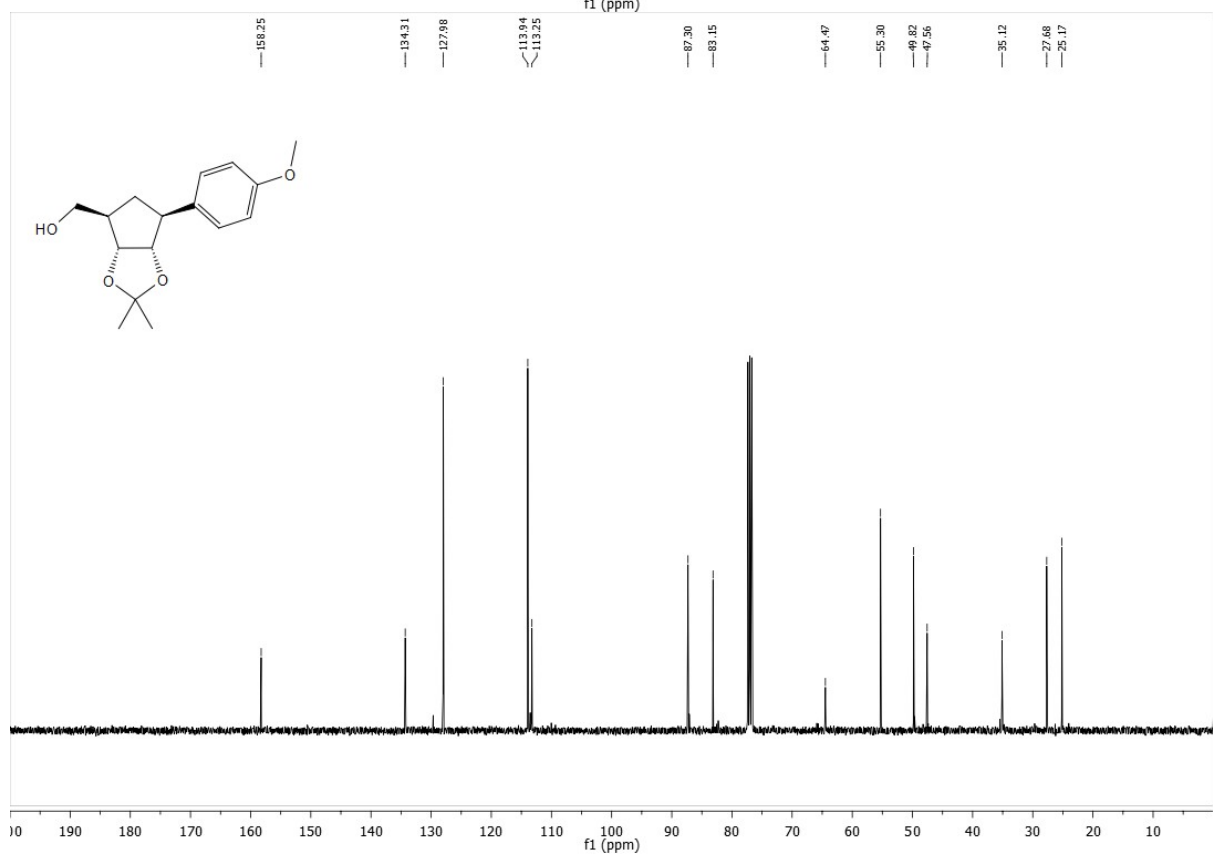

**((3aR,4R,6S,6aS)-2,2-dimethyl-6-(4-(trifluoromethoxy)phenyl)tetrahydro-4H-cyclopenta[d][1,3]dioxol-4-yl)methanol (10d)**

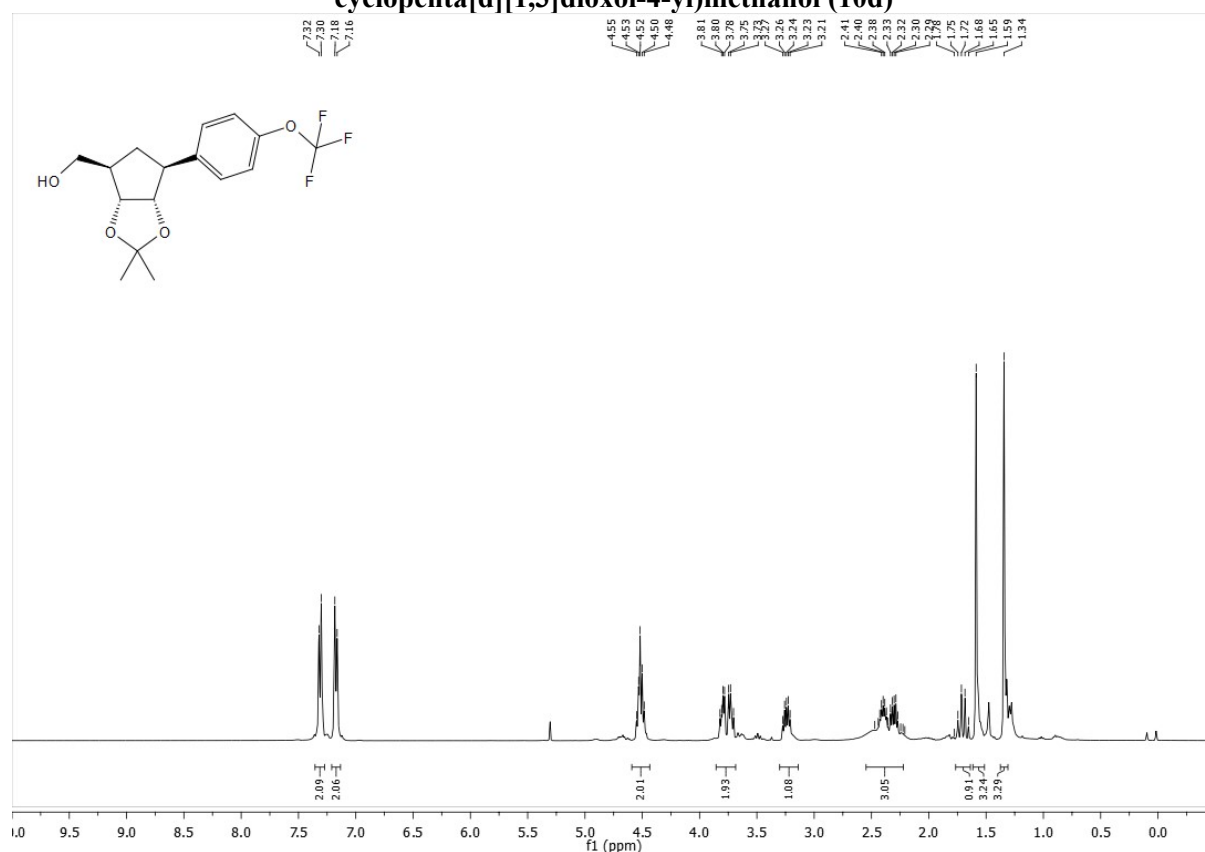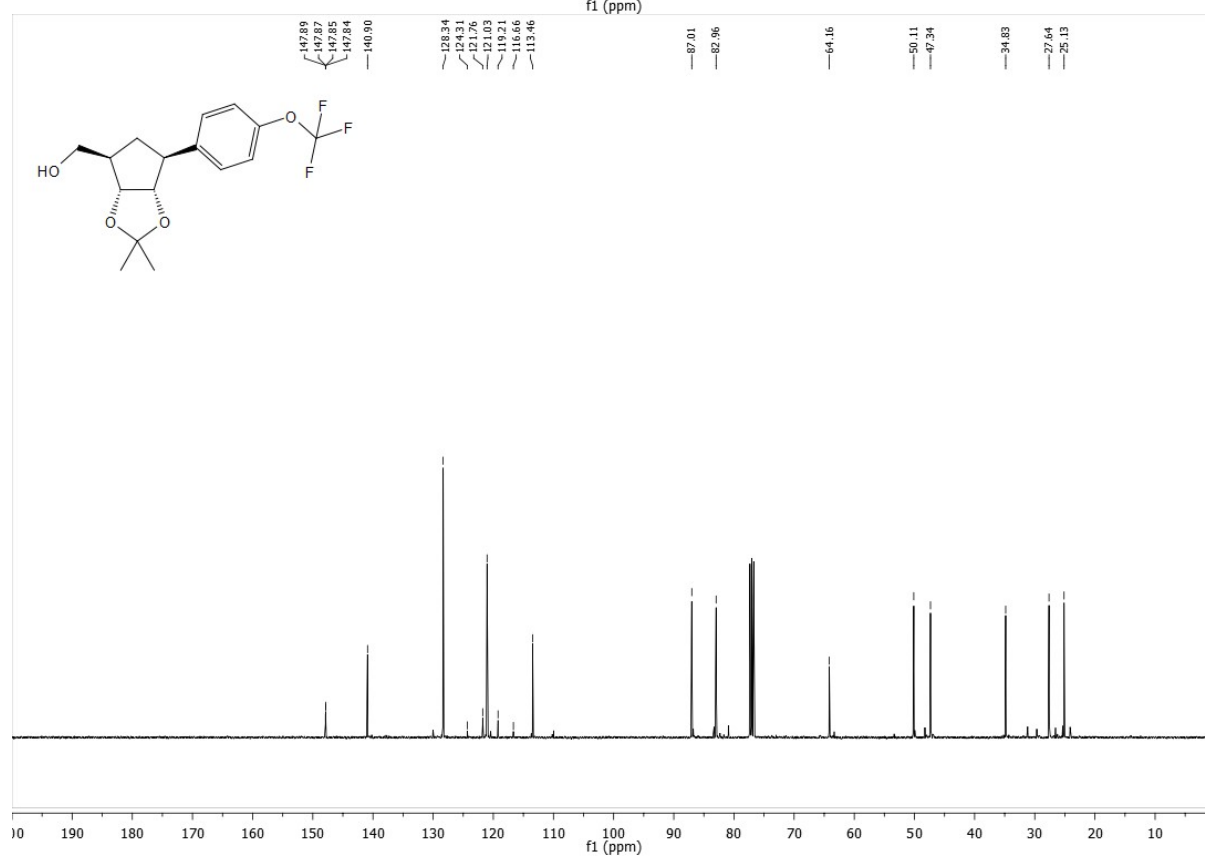

**((3aR,4R,6S,6aS)-2,2-dimethyl-6-(2-methylpyridin-3-yl)tetrahydro-4H-cyclopenta[d][1,3]dioxol-4-yl)methanol (10e)**

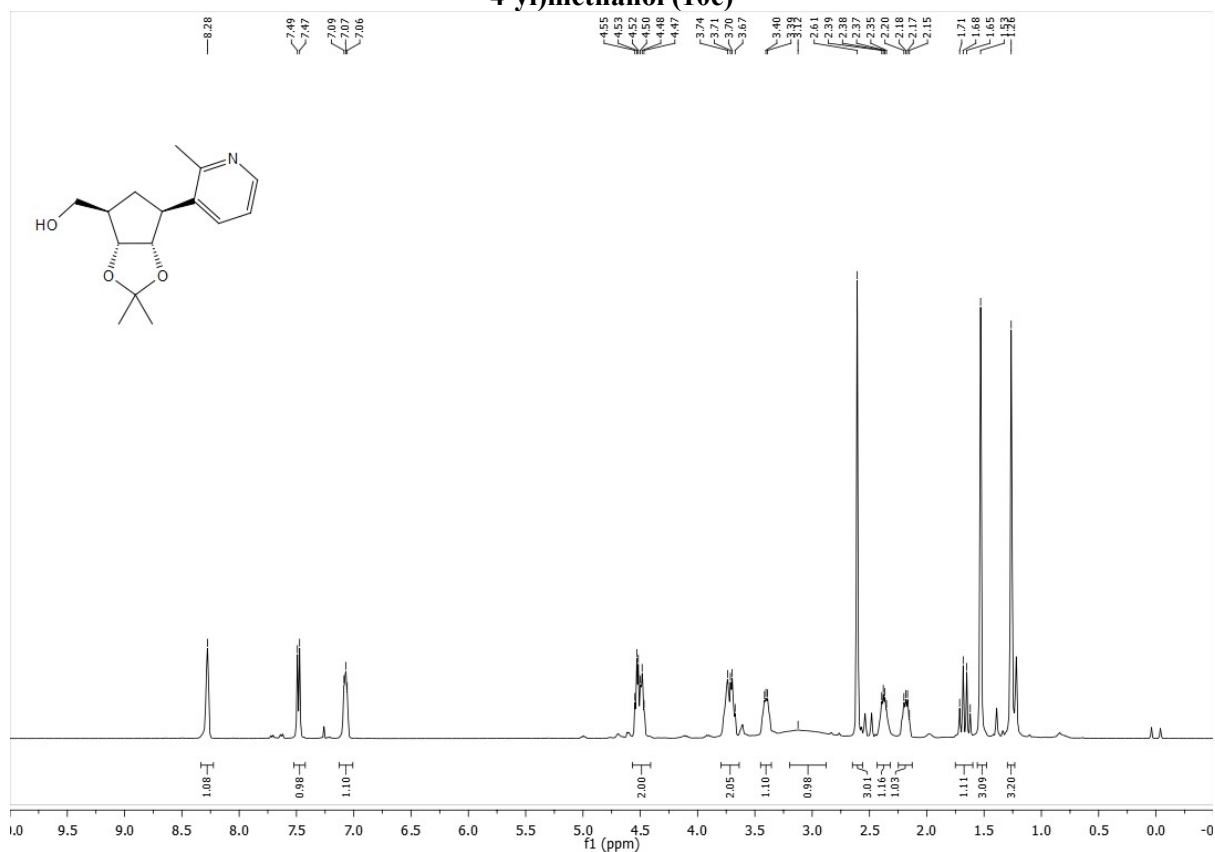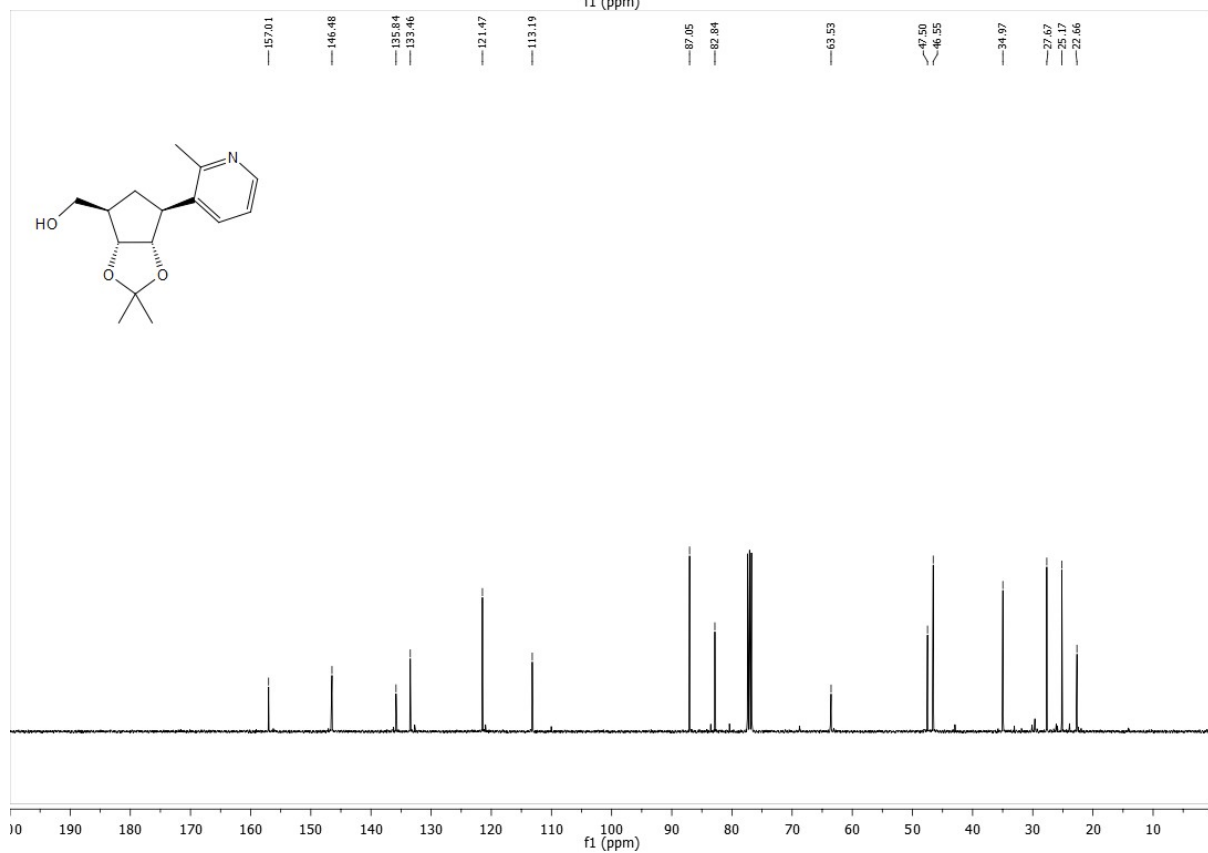

**((3aR,4R,6S,6aS)-2,2-dimethyl-6-(naphthalen-2-yl)tetrahydro-4H-cyclopenta[d][1,3]dioxol-4-yl)methanol (10f)**

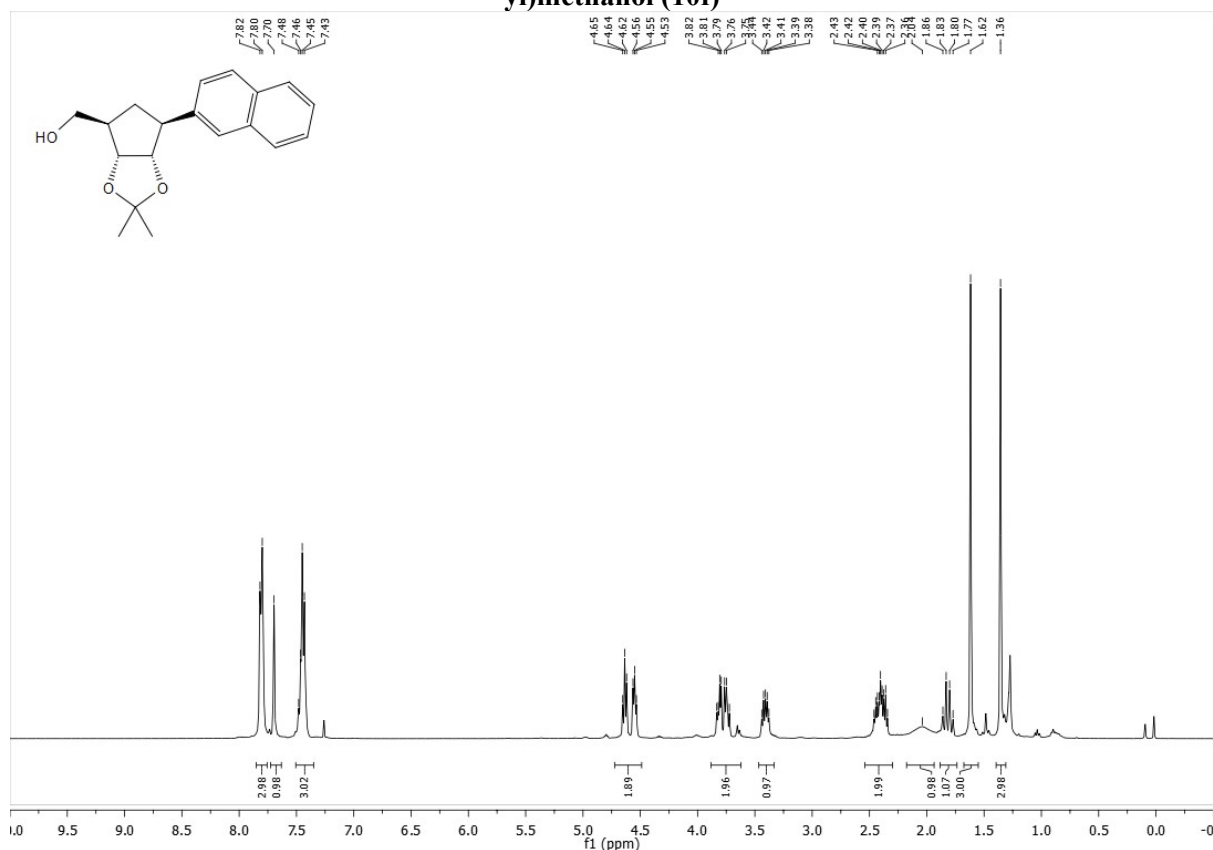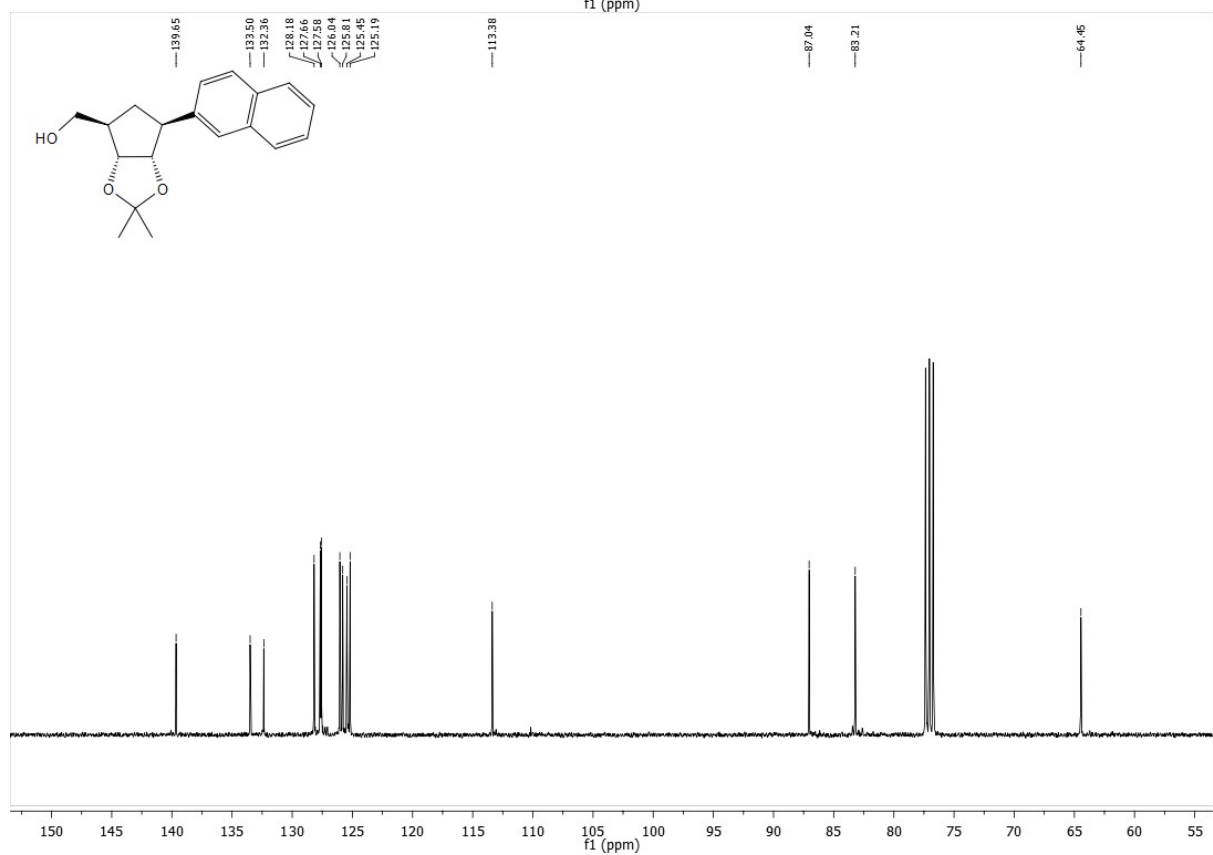

**((3aR,4R,6S,6aS)-6-(3-methoxynaphthalen-2-yl)-2,2-dimethyltetrahydro-4H-cyclopenta[d][1,3]dioxol-4-yl)methanol (10g)**

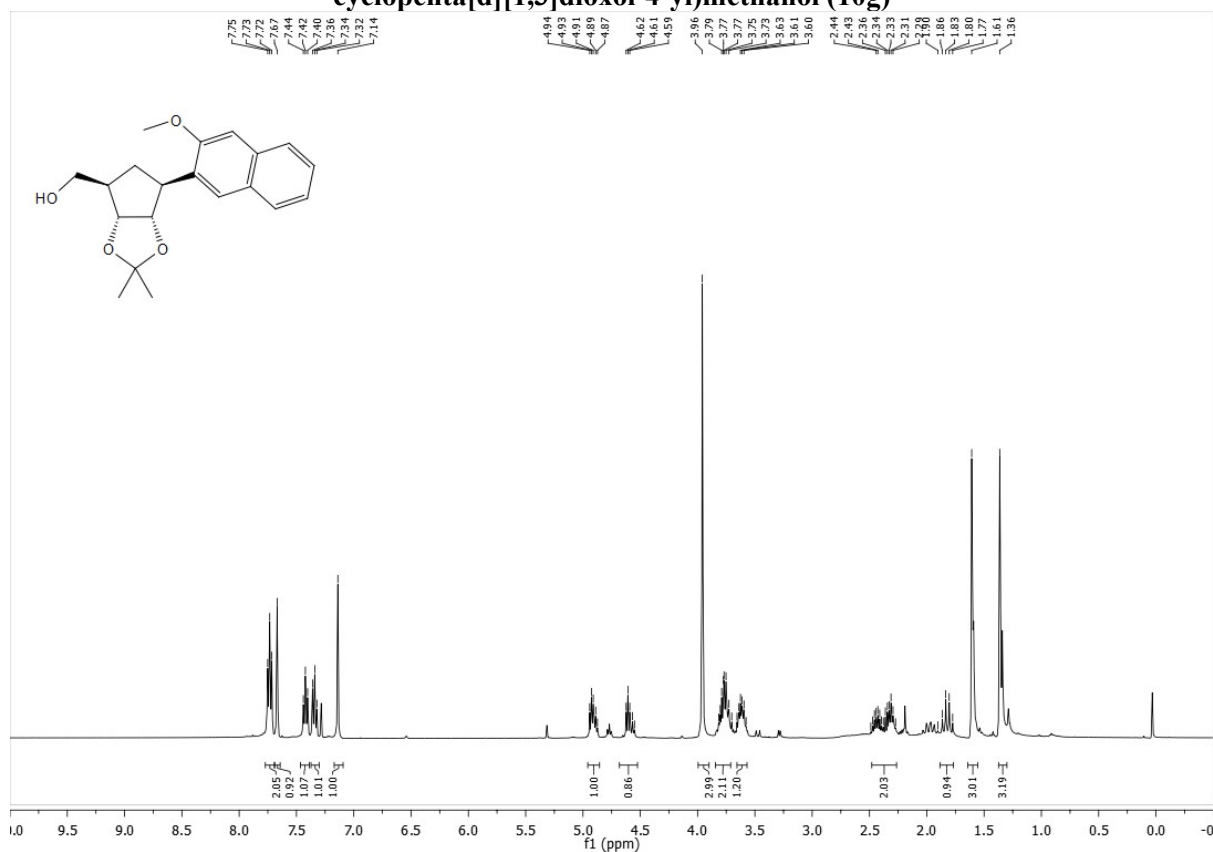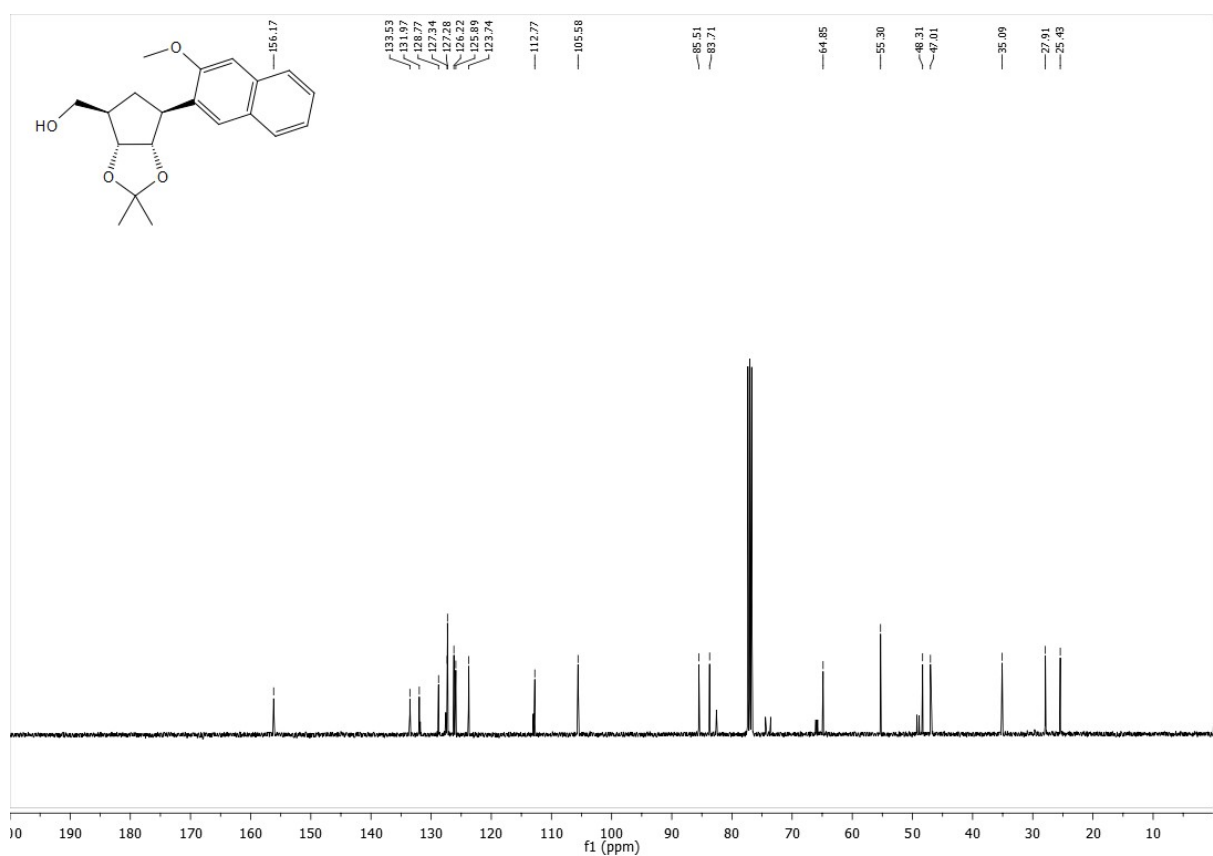

**((3aR,4R,6S,6aS)-2,2-dimethyl-6-(naphthalen-1-yl)tetrahydro-4H-cyclopenta[d][1,3]dioxol-4-yl)methanol (10h)**

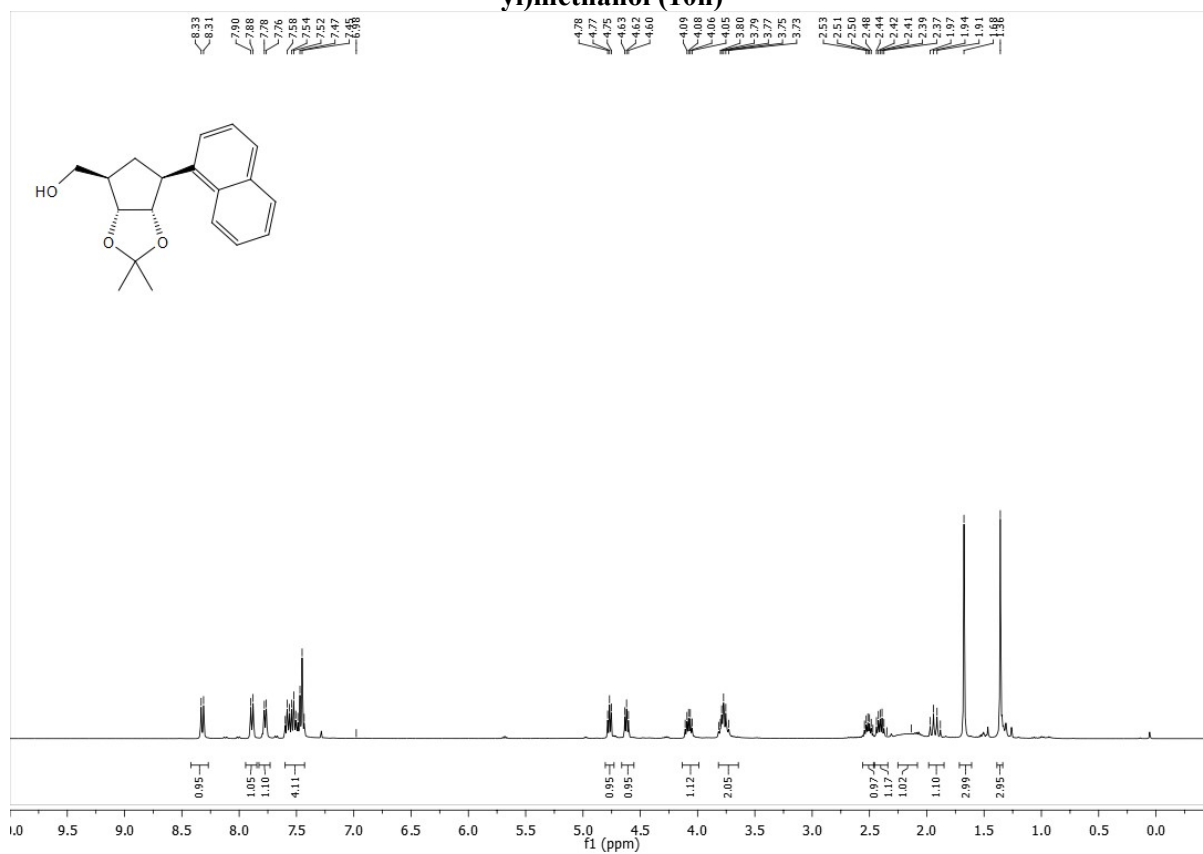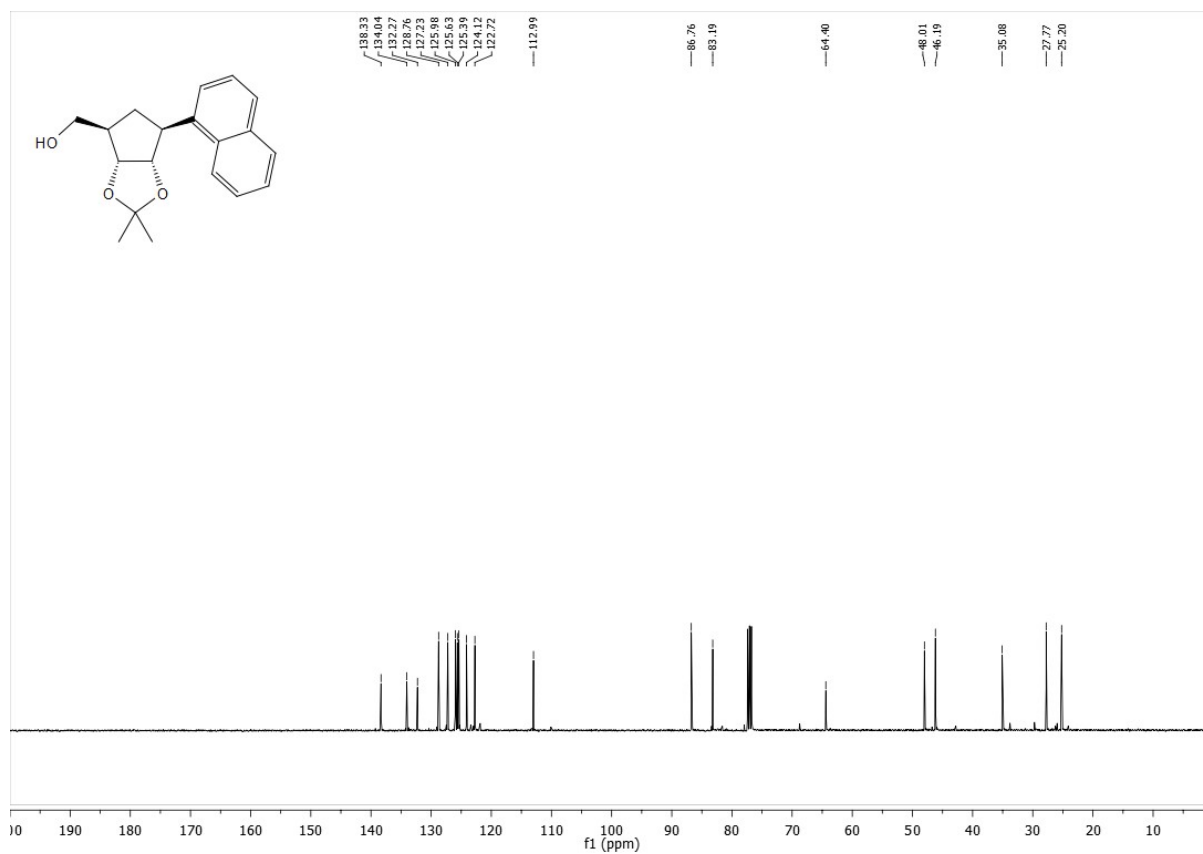

**((3*R*,4*R*,6*S*,6*aS*)-6-(2,4-difluoro-5-methylphenyl)-2,2-dimethyltetrahydro-4*H*-cyclopenta[*d*][1,3]dioxol-4-yl)methanol (10i)**

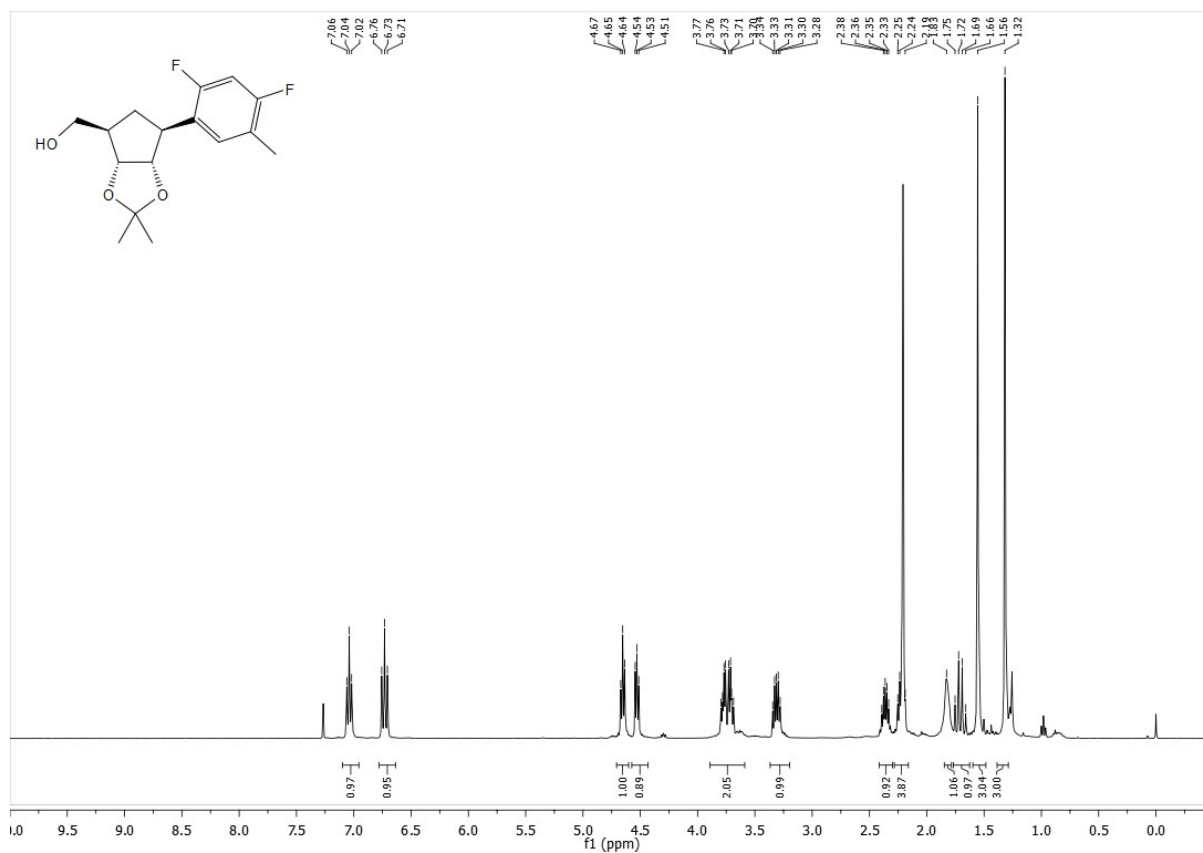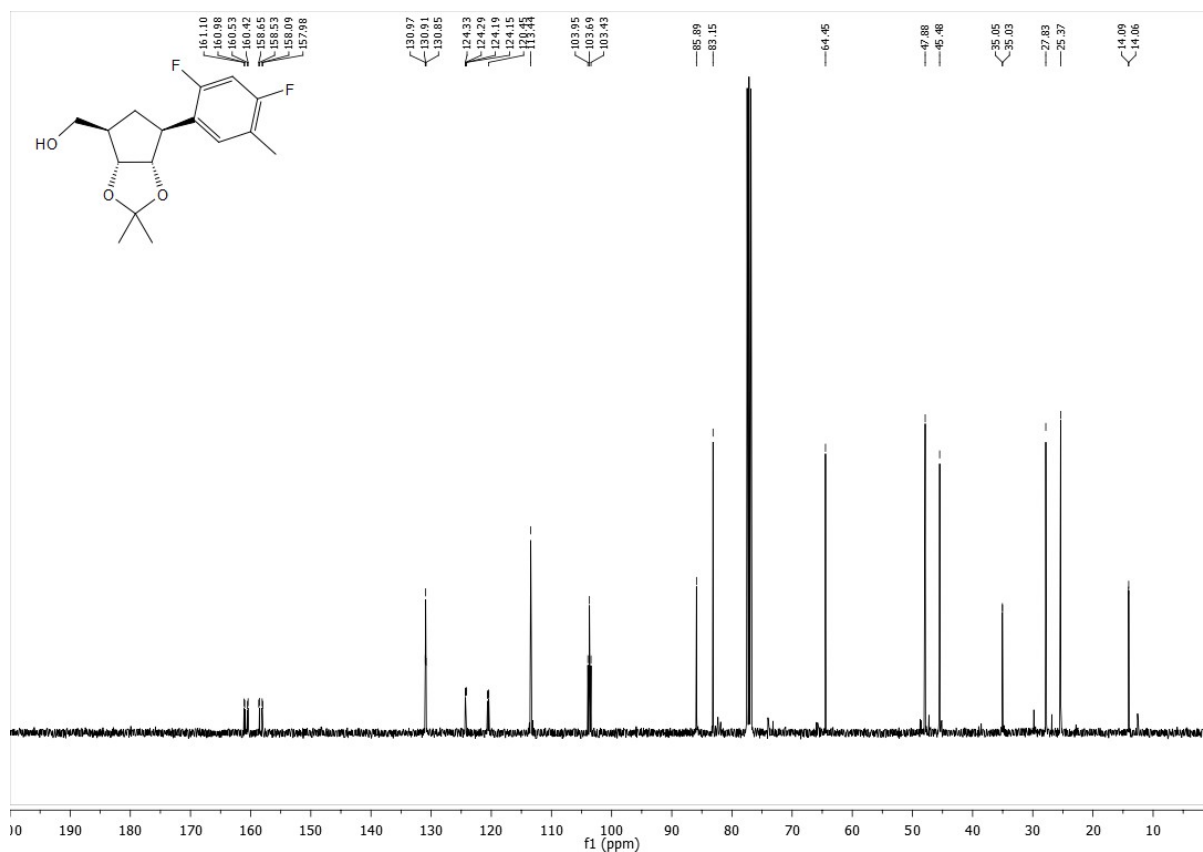



**((3aR,4R,6S,6aS)-2,2-dimethyl-6-(pyridin-3-yl)tetrahydro-4H-cyclopenta[d][1,3]dioxol-4-yl)methanol (10j)**

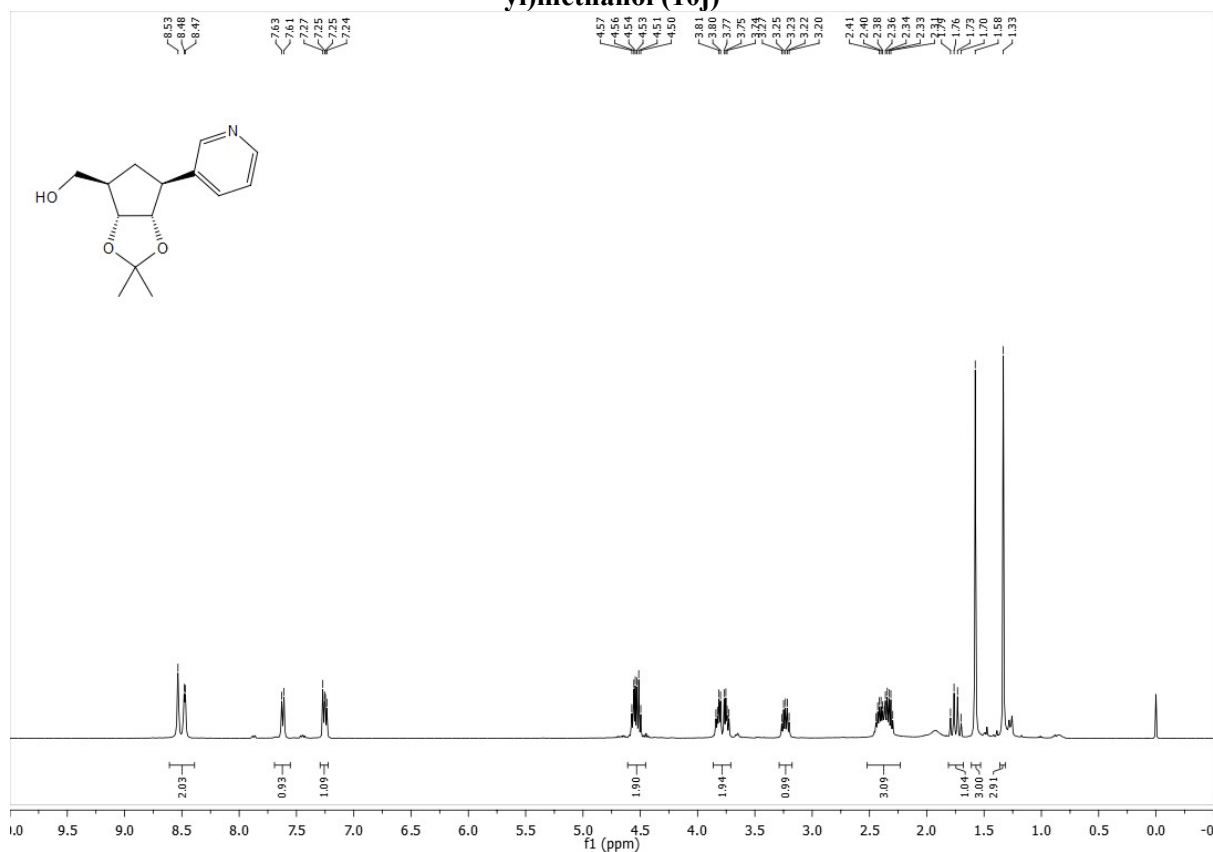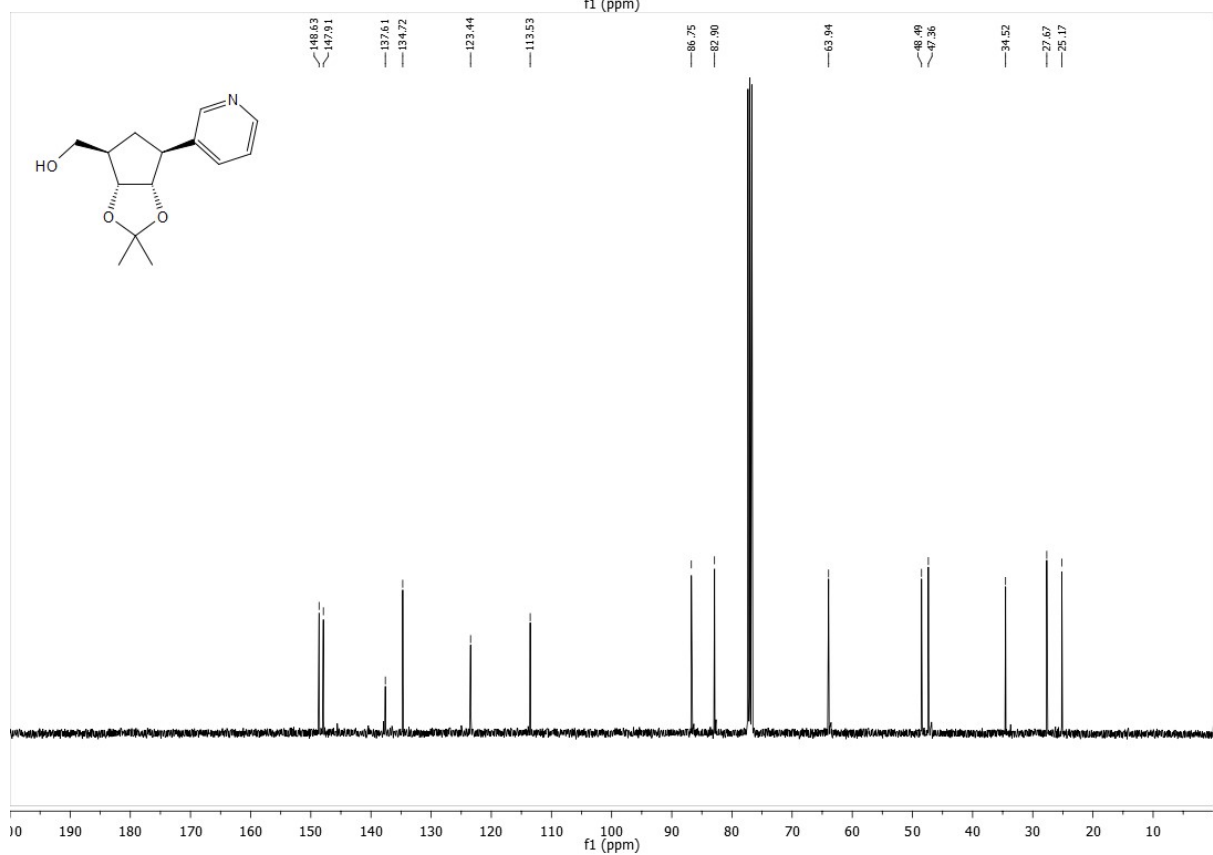

**((3aR,4R,6S,6aS)-6-(6-fluoropyridin-3-yl)-2,2-dimethyltetrahydro-4H-cyclopenta[d][1,3]dioxol-4-yl)methanol (10k)**

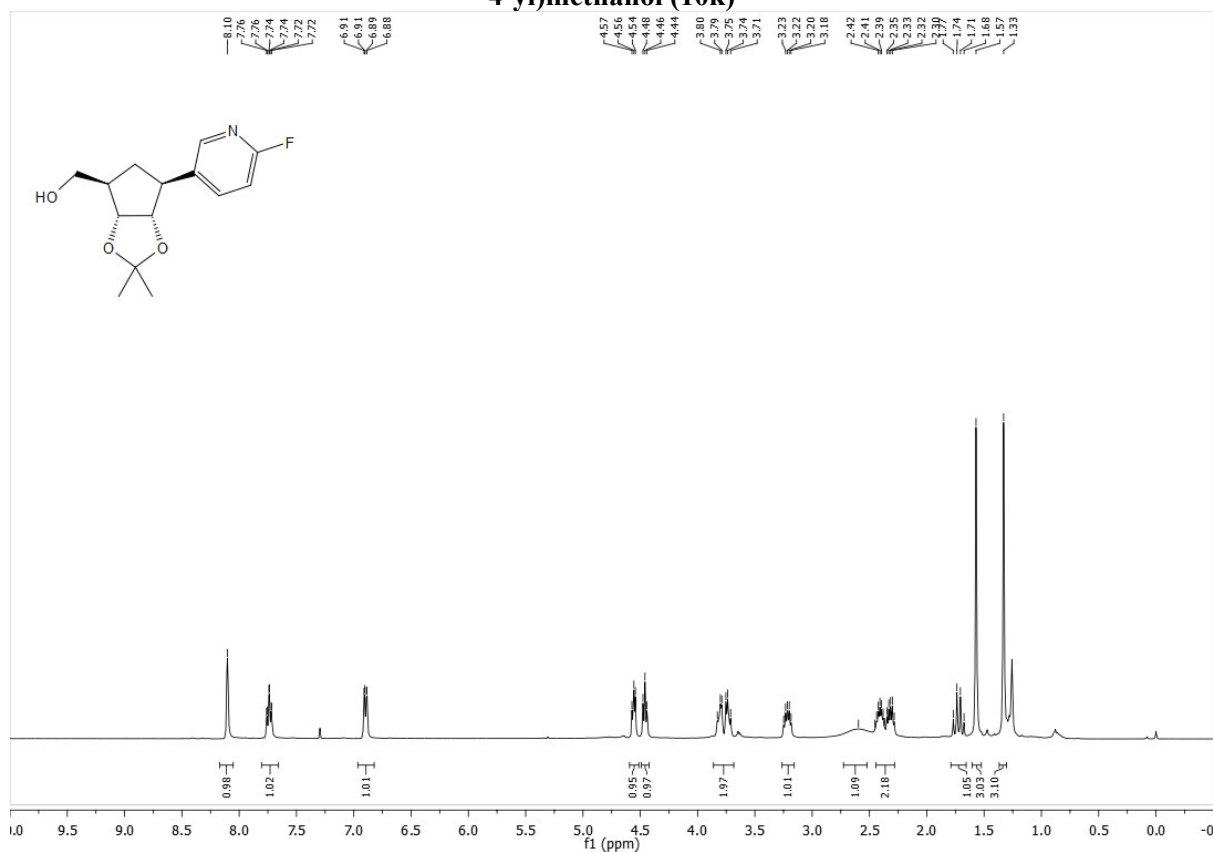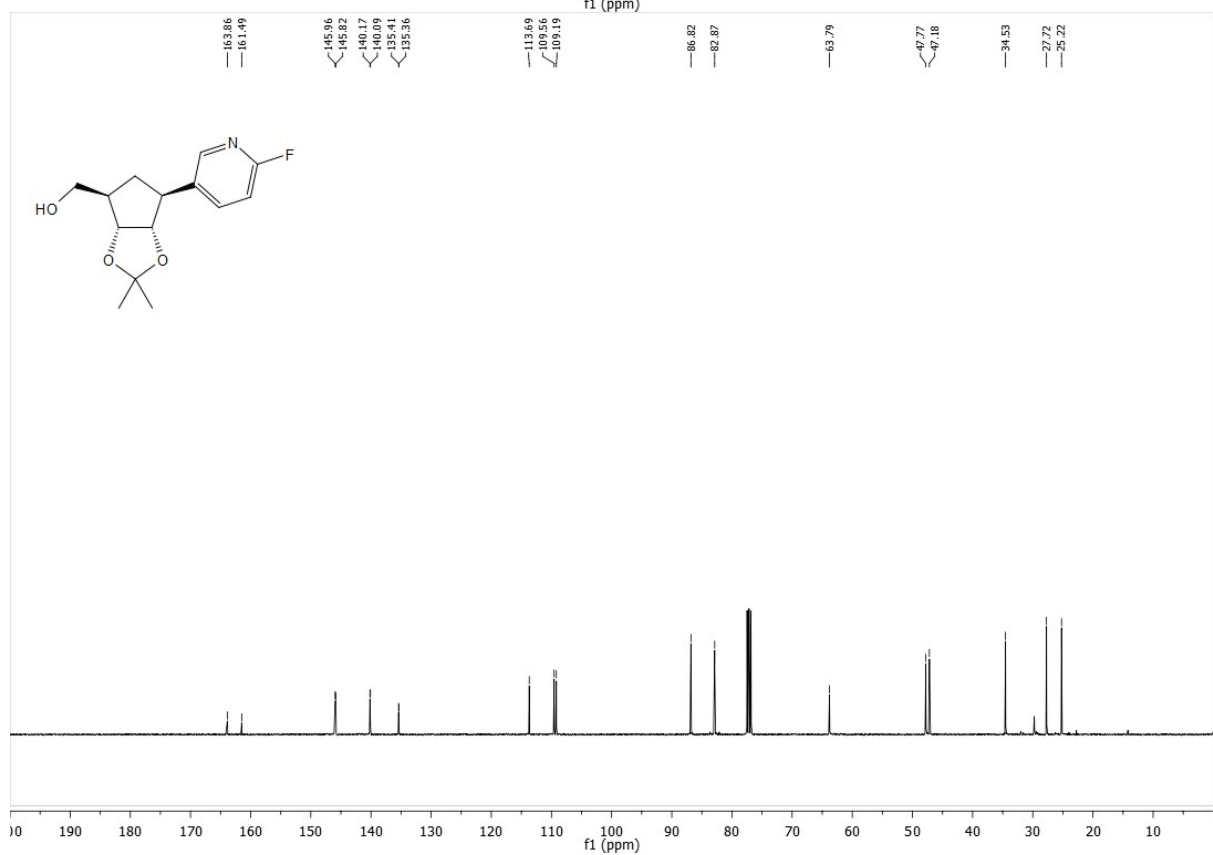

**4-((3a*S*,4*S*,6*R*,6*aR*)-6-(hydroxymethyl)-2,2-dimethyltetrahydro-4*H*-cyclopenta[*d*][1,3]dioxol-4-yl)benzonitrile (101)**

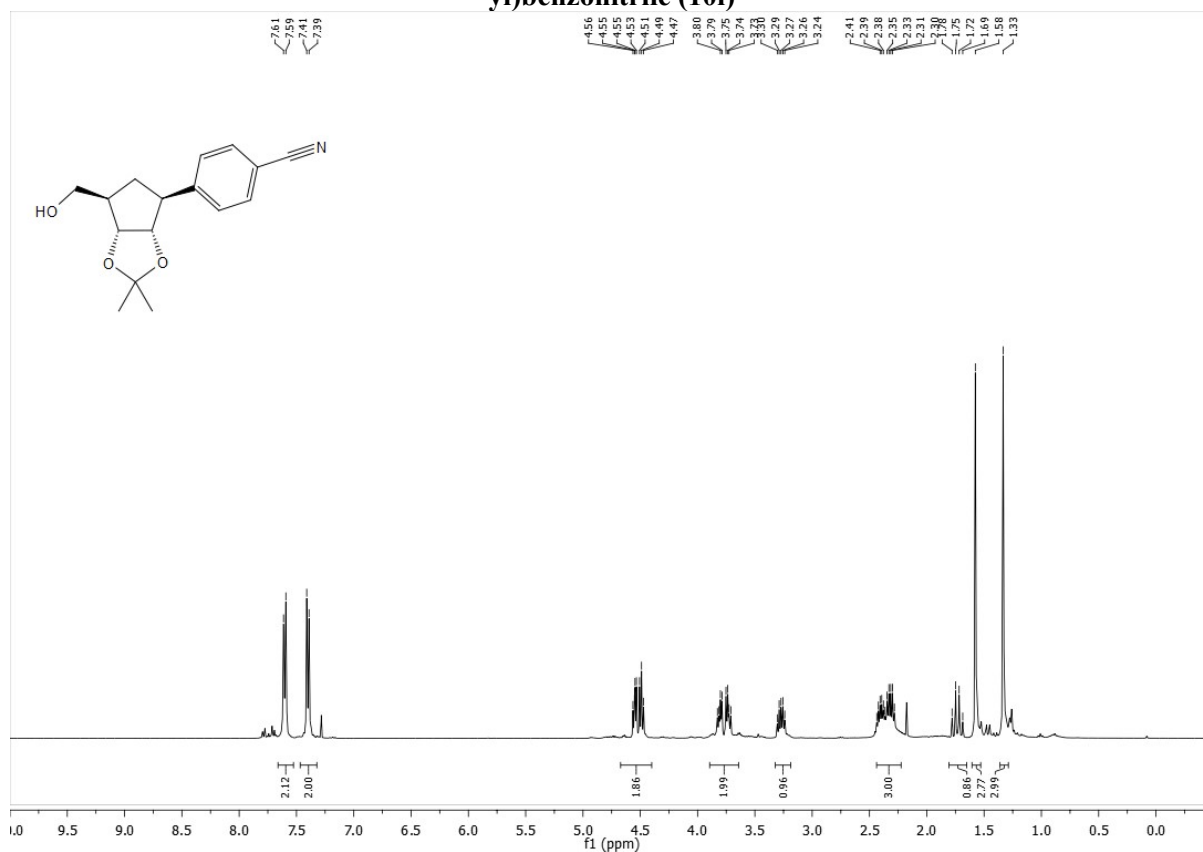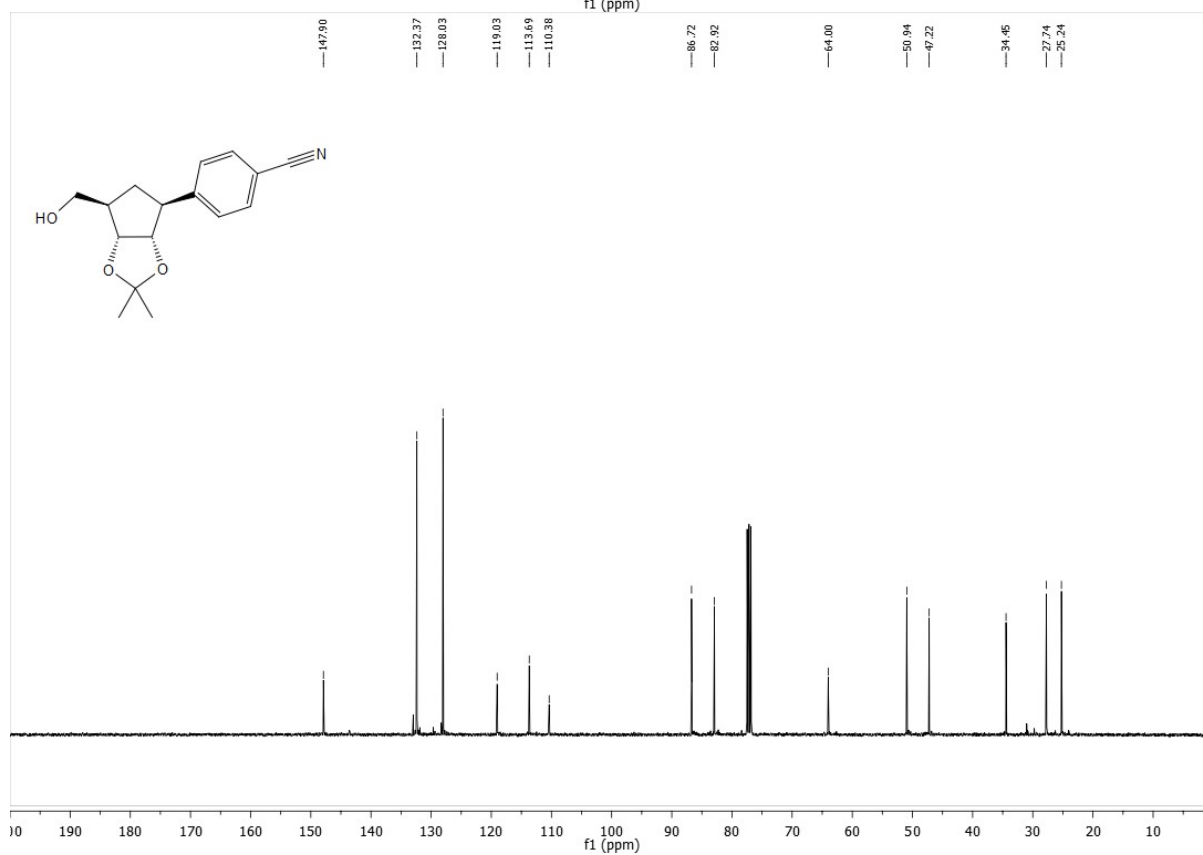

1S,2R,3R,5S)-3-(hydroxymethyl)-5-phenylcyclopentane-1,2-diol (11a)

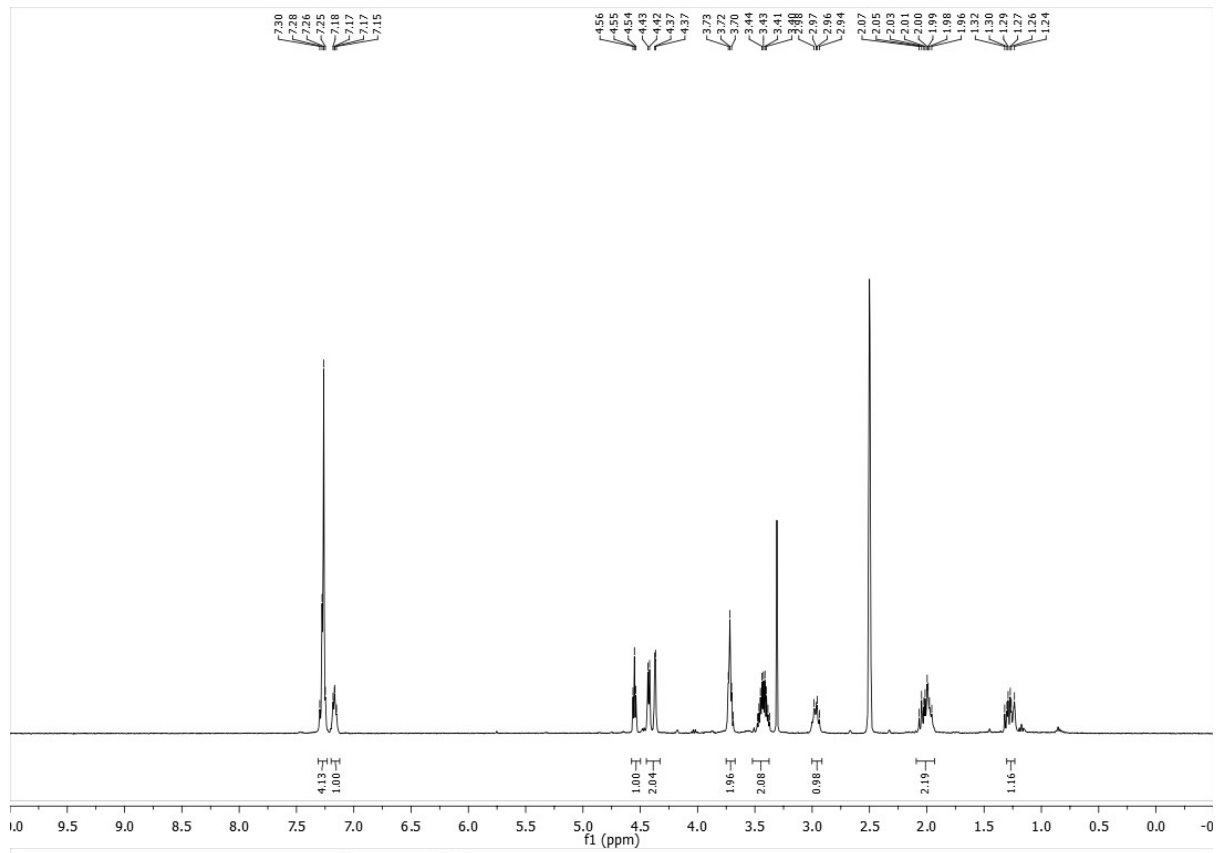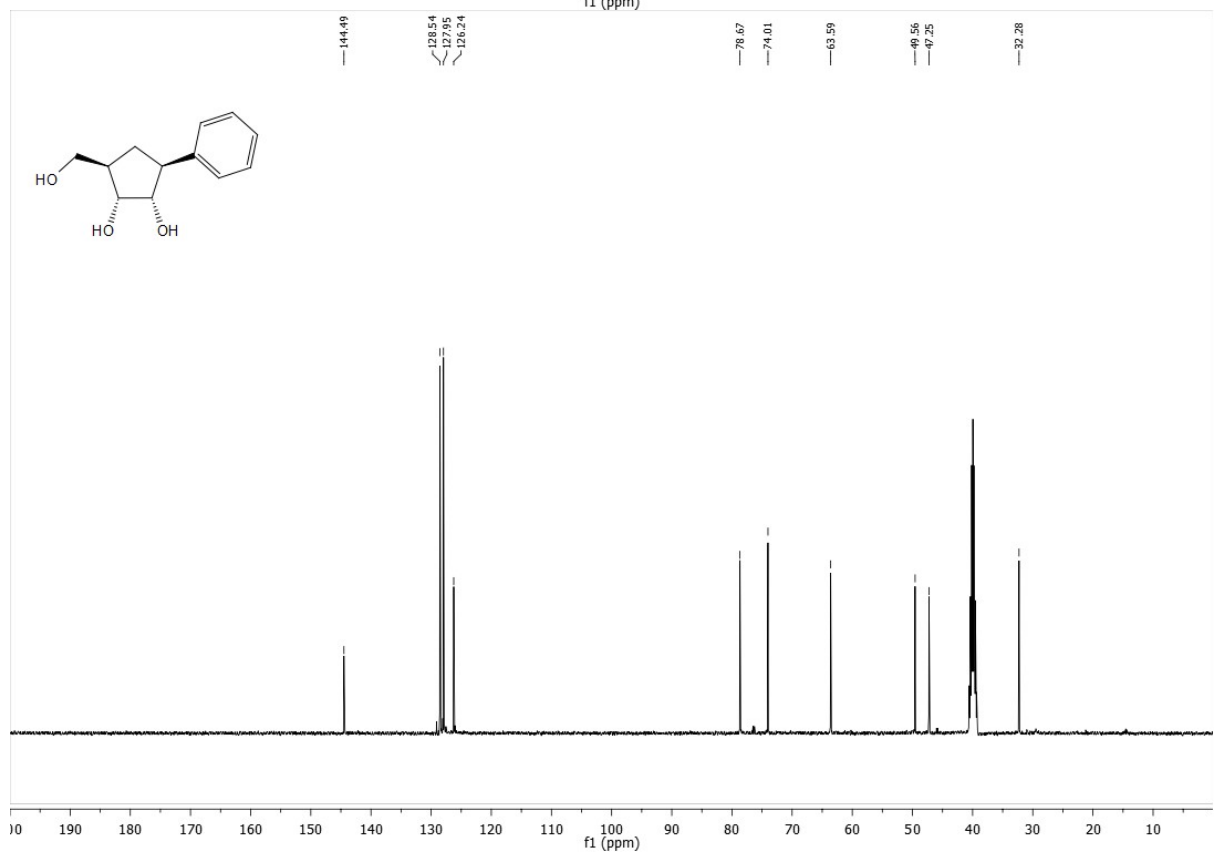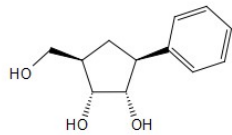

(1R,2S,3S,5R)-3-(4-fluorophenyl)-5-(hydroxymethyl)cyclopentane-1,2-diol (11b)

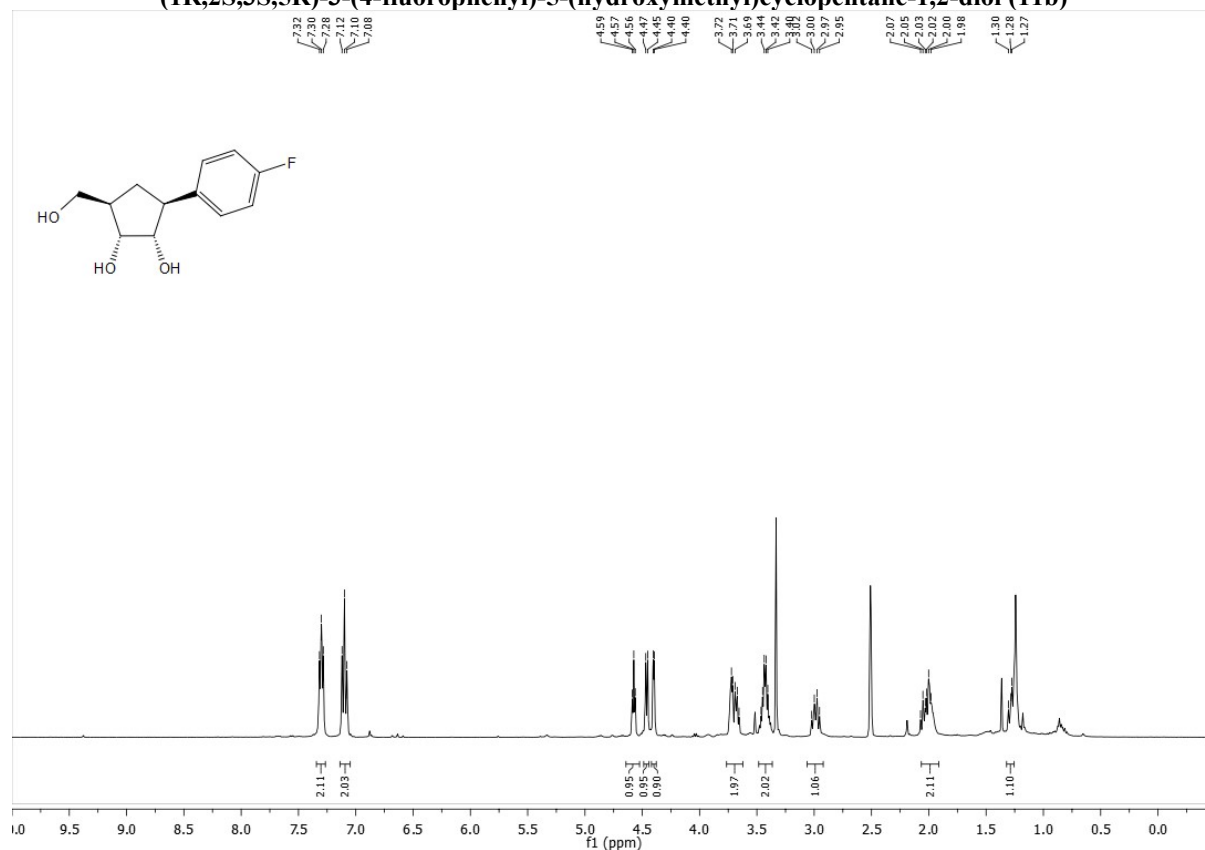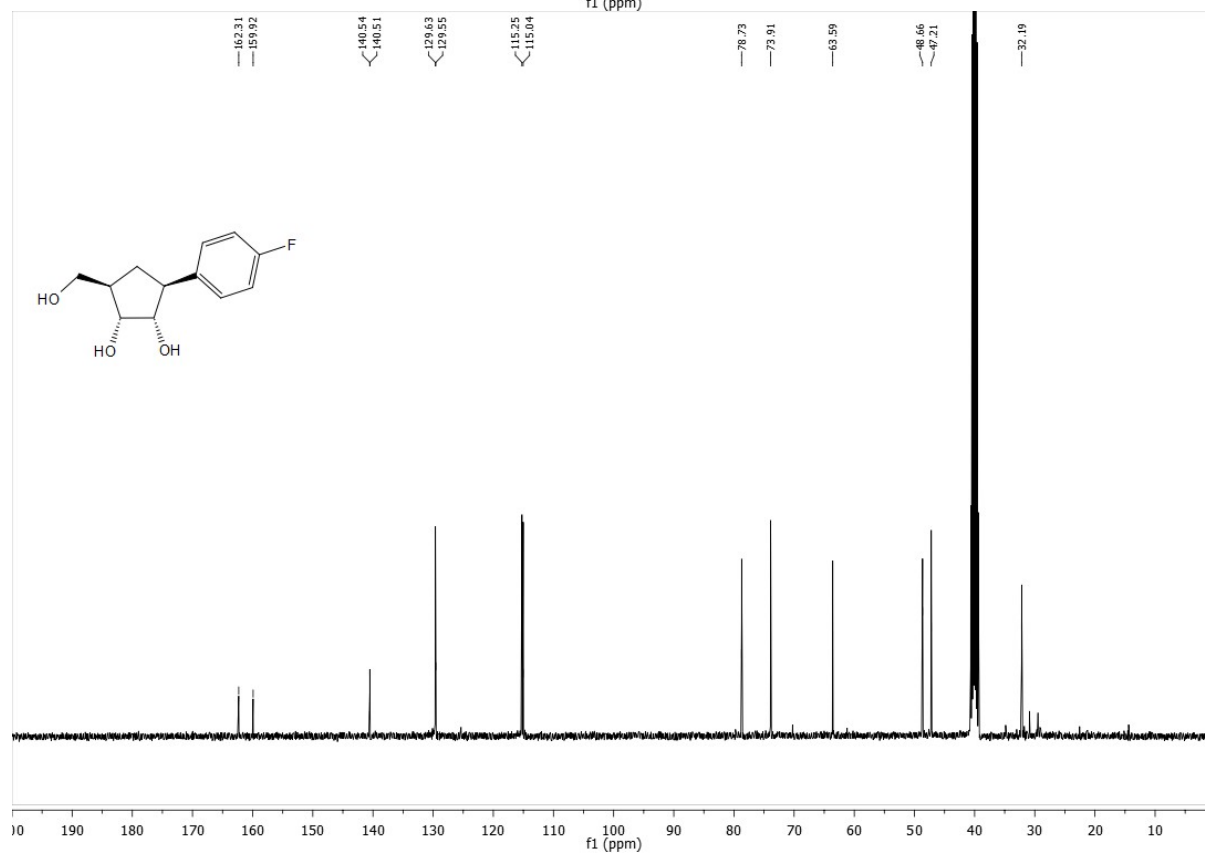

**(1S,2R,3R,5S)-3-(hydroxymethyl)-5-(4-methoxyphenyl)cyclopentane-1,2-diol (11c)**

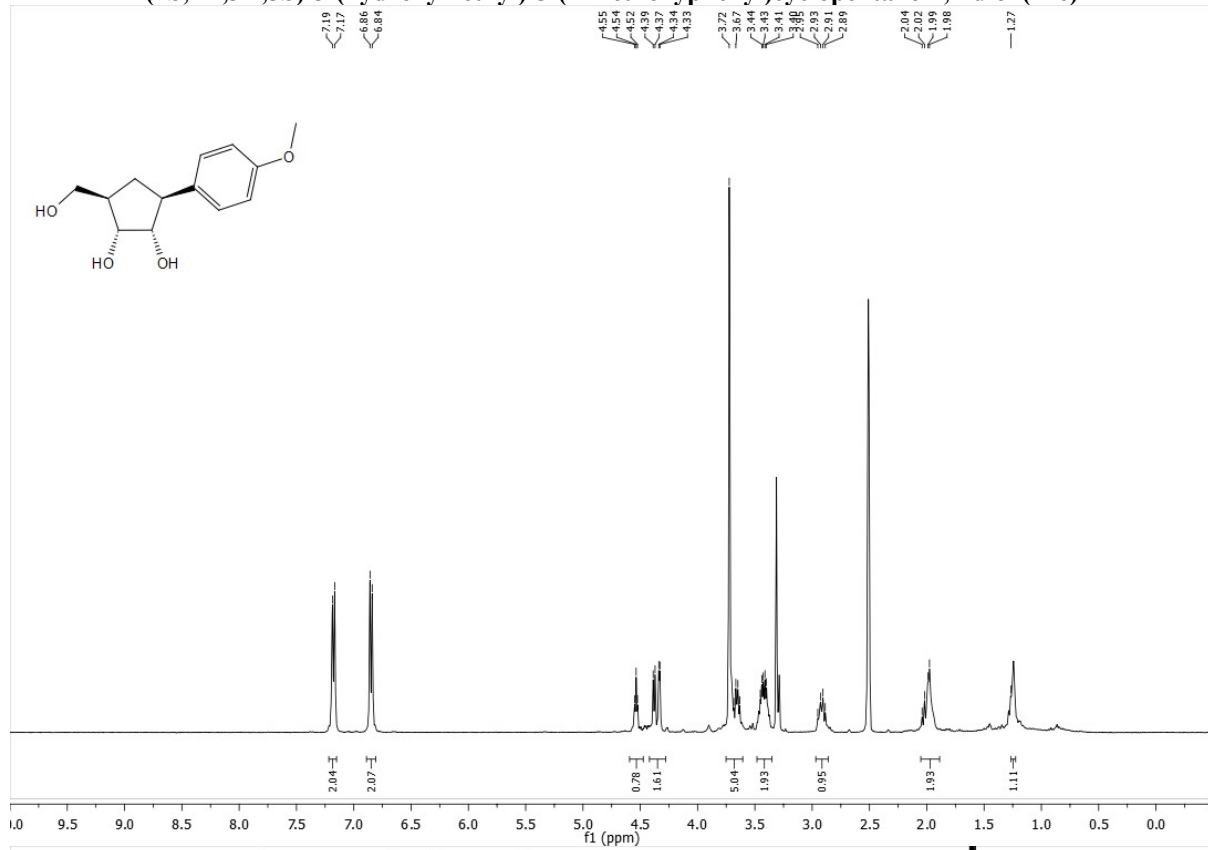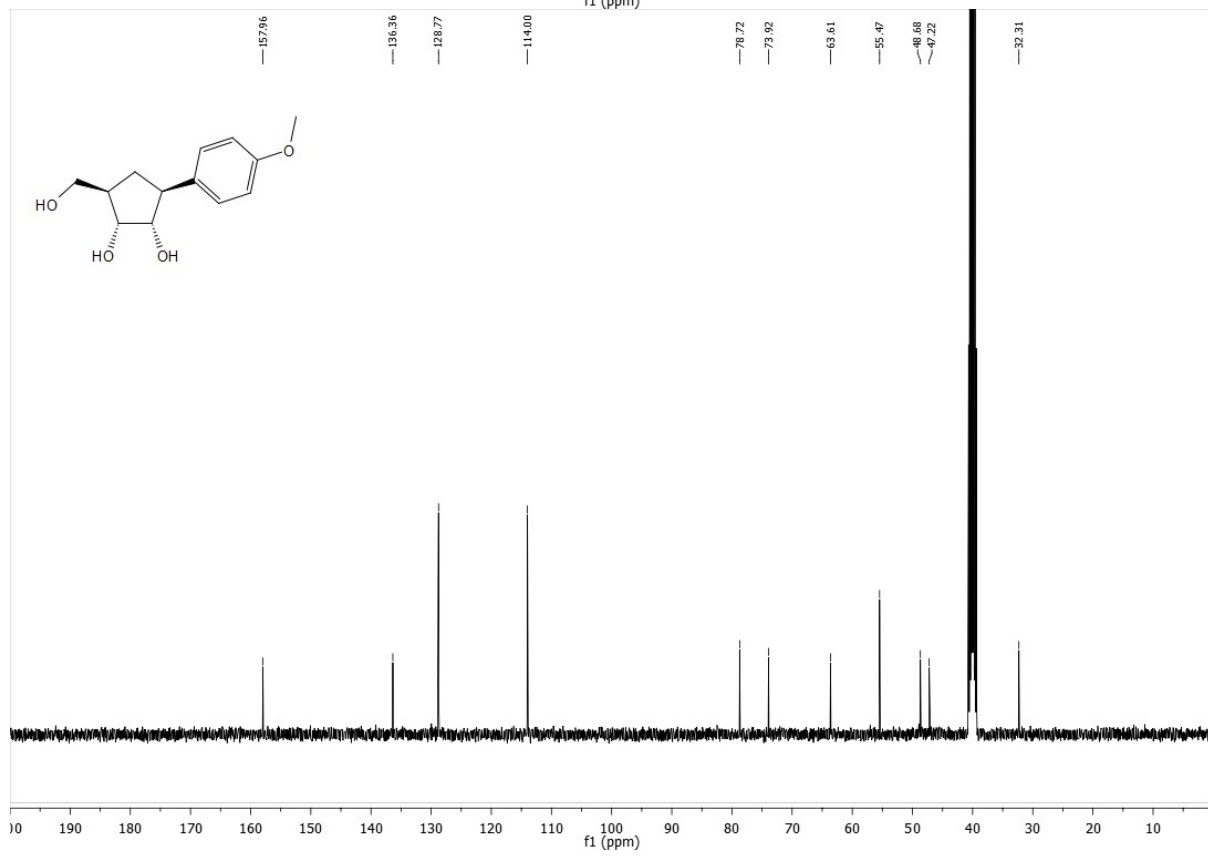

**(1S,2R,3R,5S)-3-(hydroxymethyl)-5-(4-(trifluoromethoxy)phenyl)cyclopentane-1,2-diol (11d)**

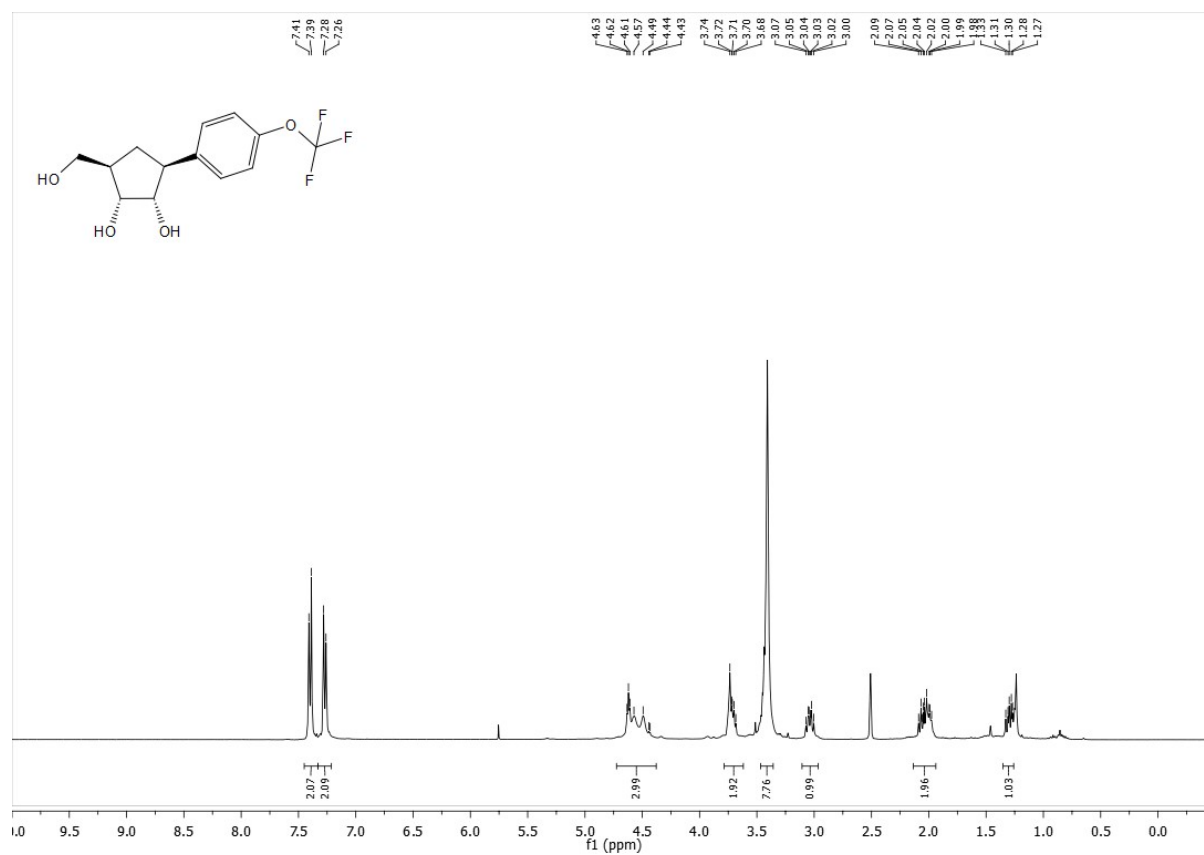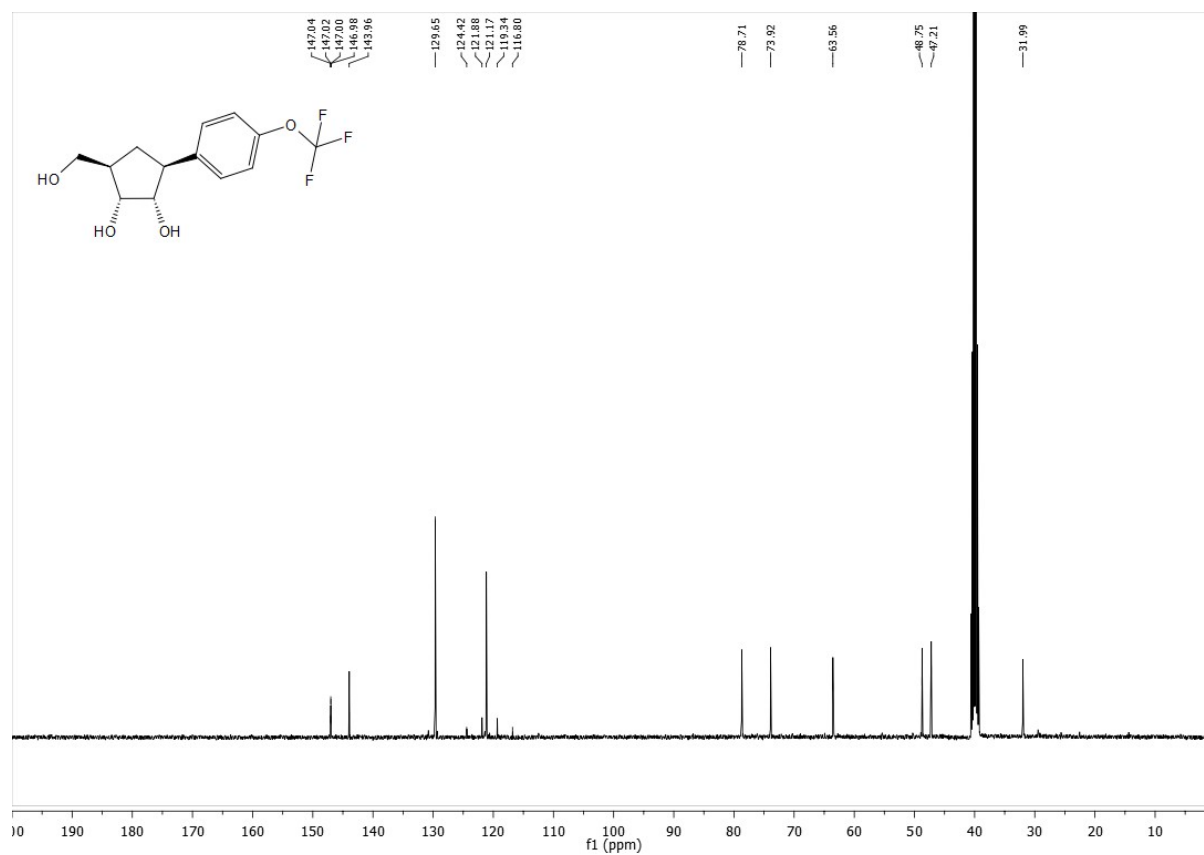

(1S,2R,3R,5S)-3-(hydroxymethyl)-5-(2-methylpyridin-3-yl)cyclopentane-1,2-diol (11e)

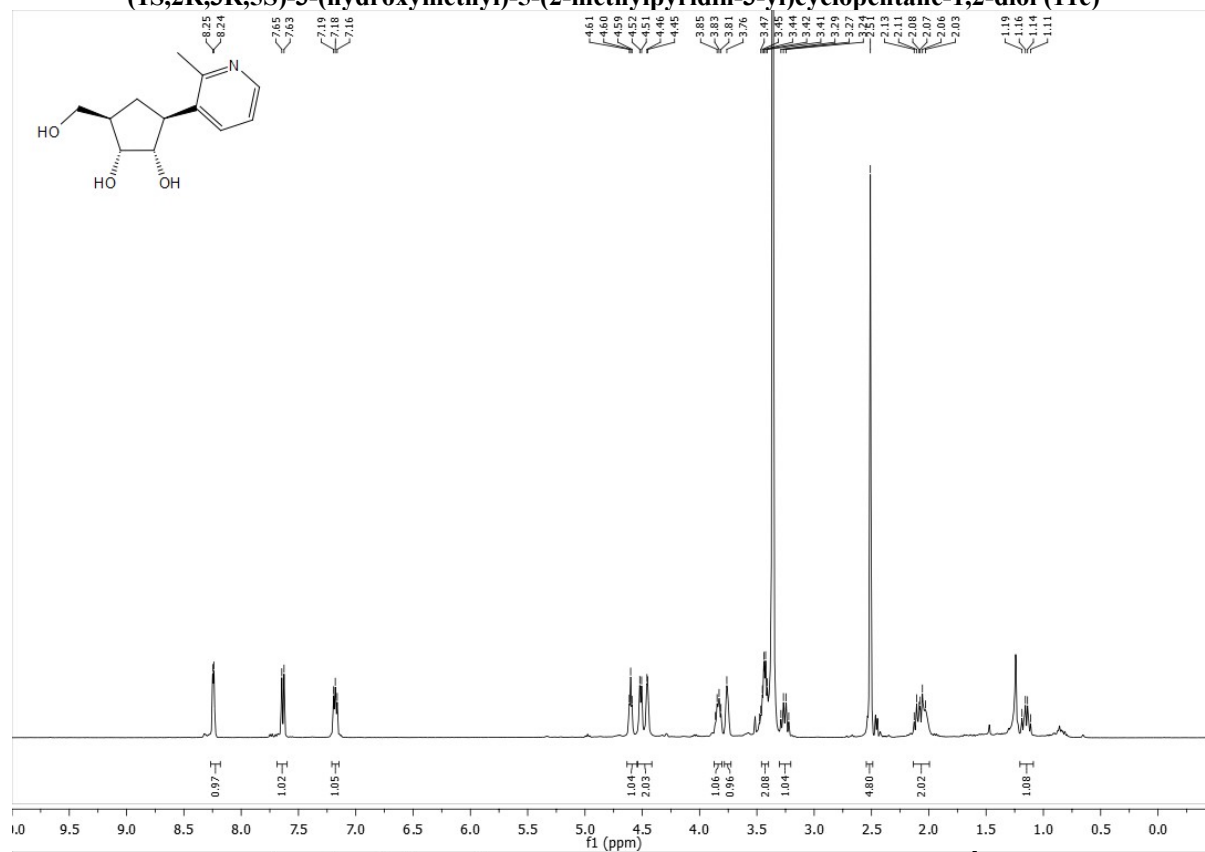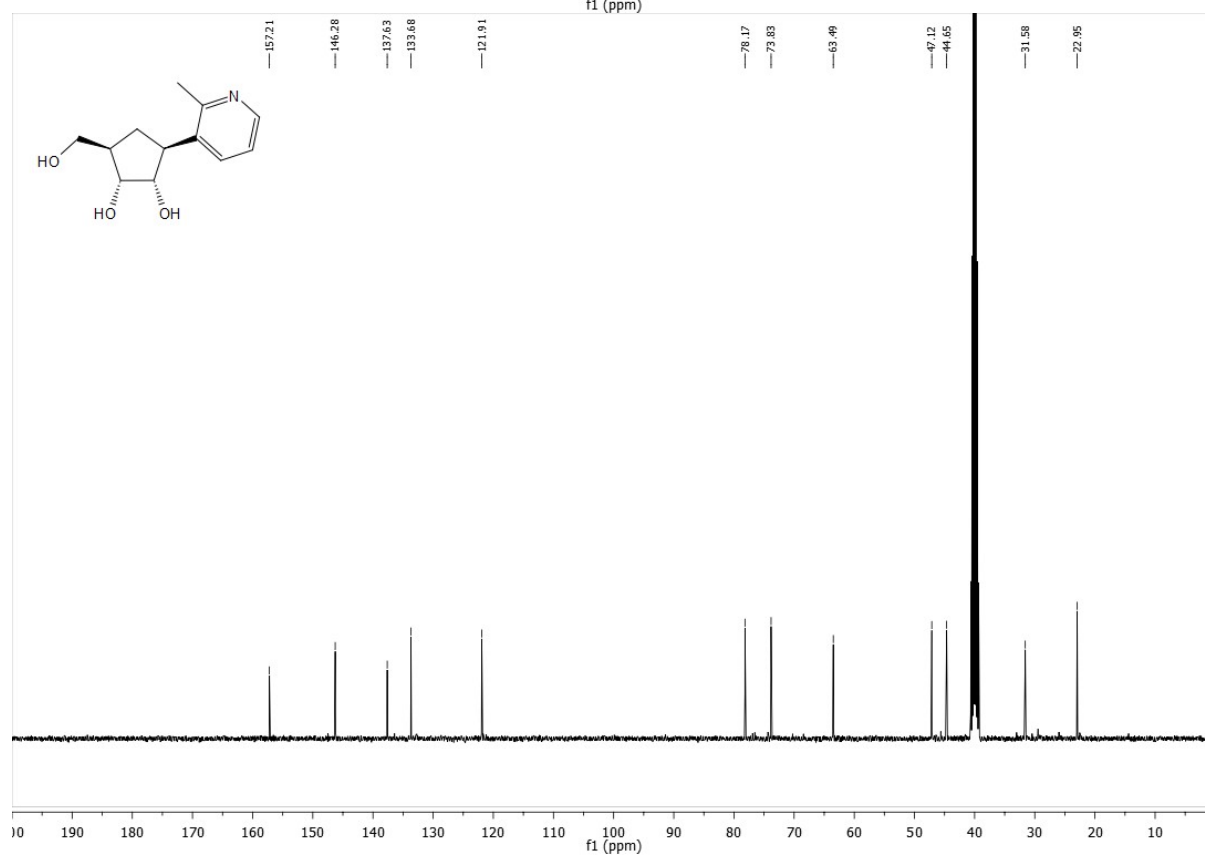



(1S,2R,3R,5S)-3-(hydroxymethyl)-5-(naphthalen-2-yl)cyclopentane-1,2-diol (11f)

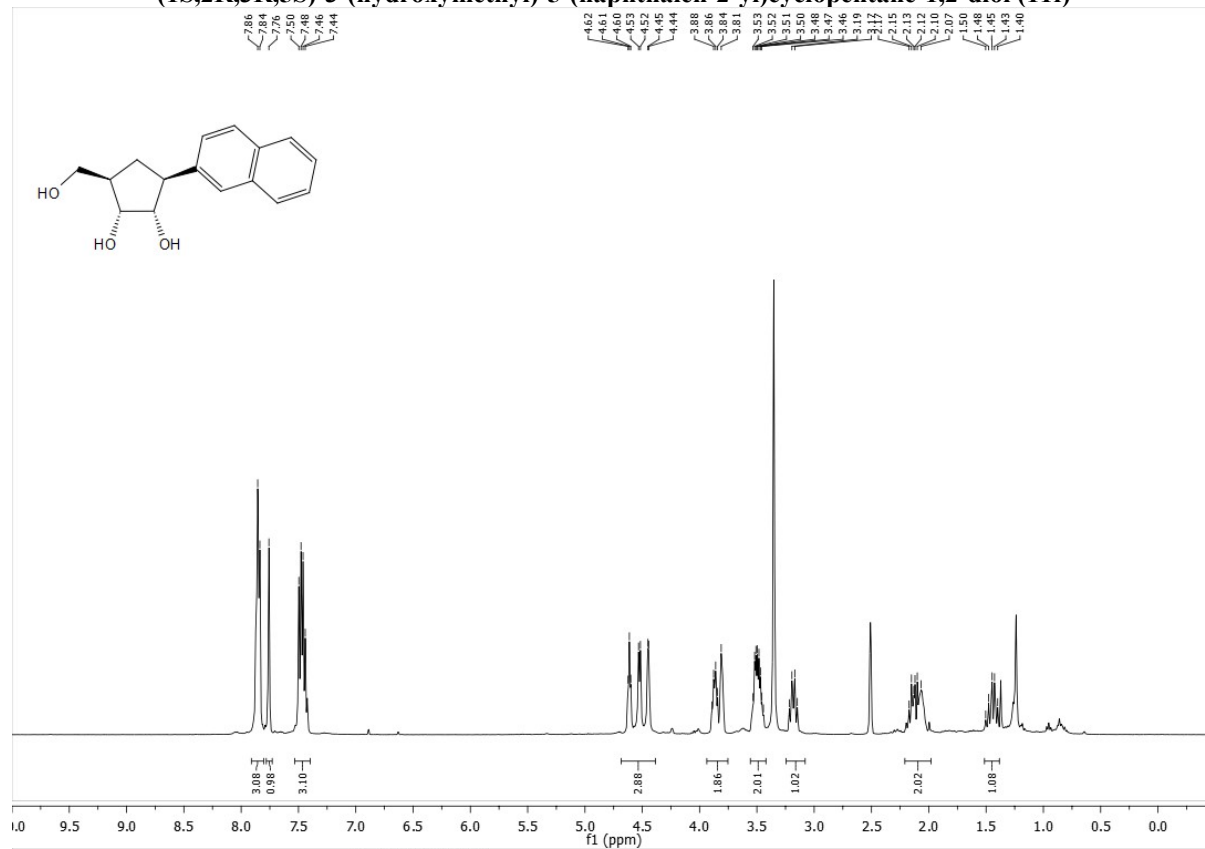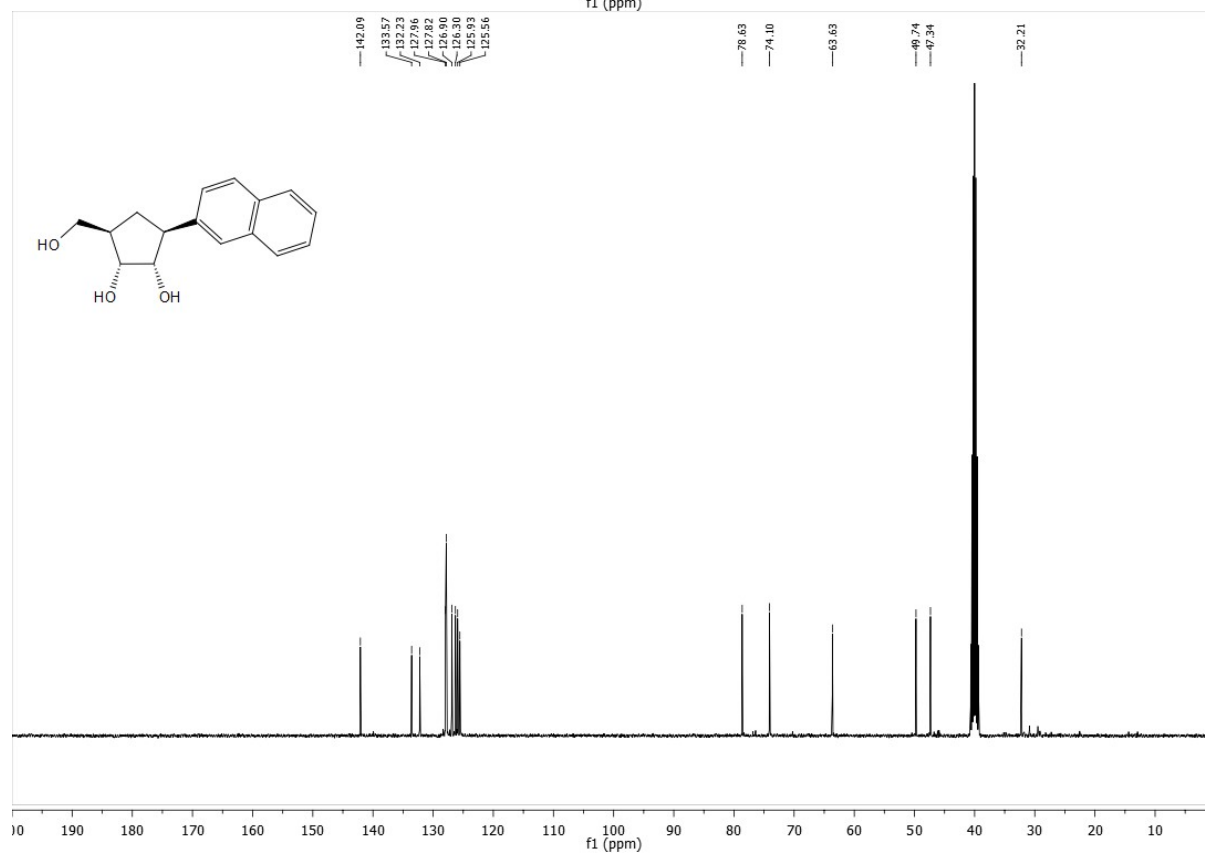

(1S,2R,3R,5S)-3-(hydroxymethyl)-5-(3-methoxynaphthalen-2-yl)cyclopentane-1,2-diol (11g)

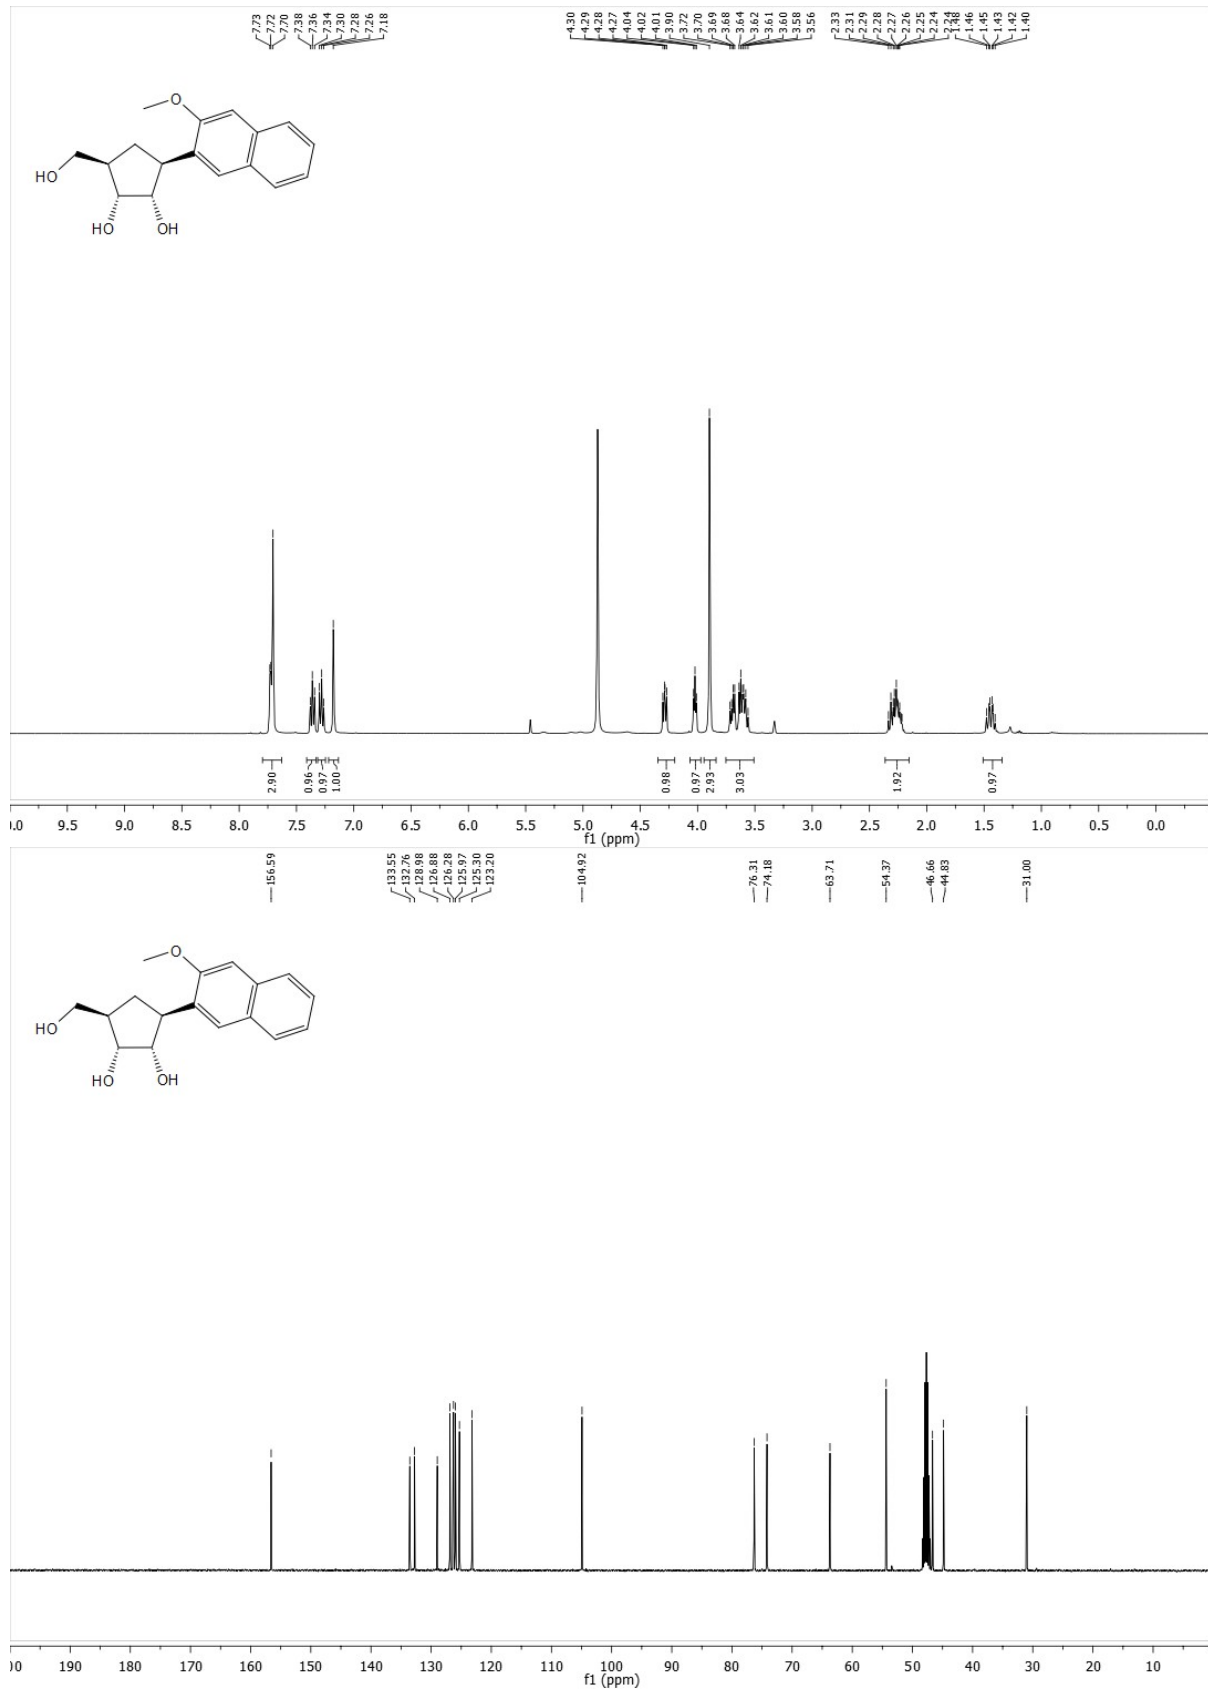

**(1S,2R,3R,5S)-3-(hydroxymethyl)-5-(naphthalen-1-yl)cyclopentane-1,2-diol (11h)**

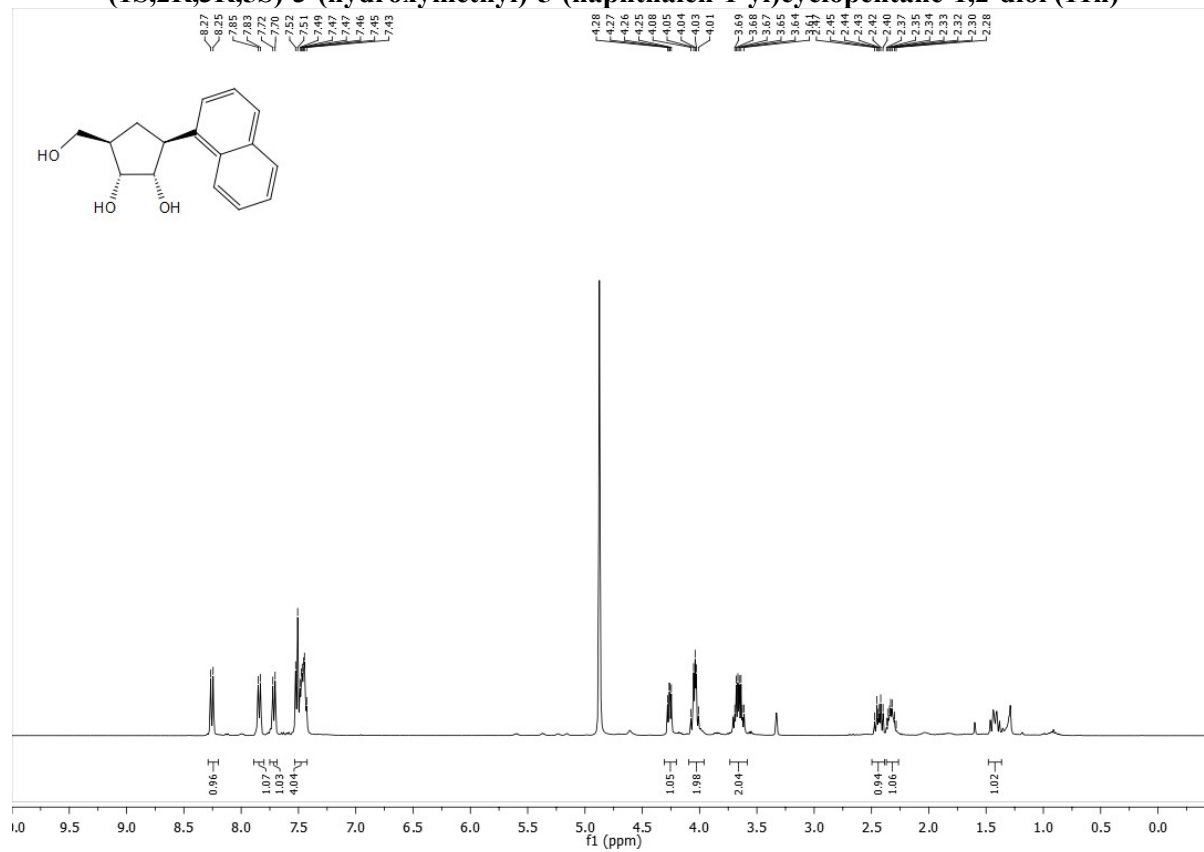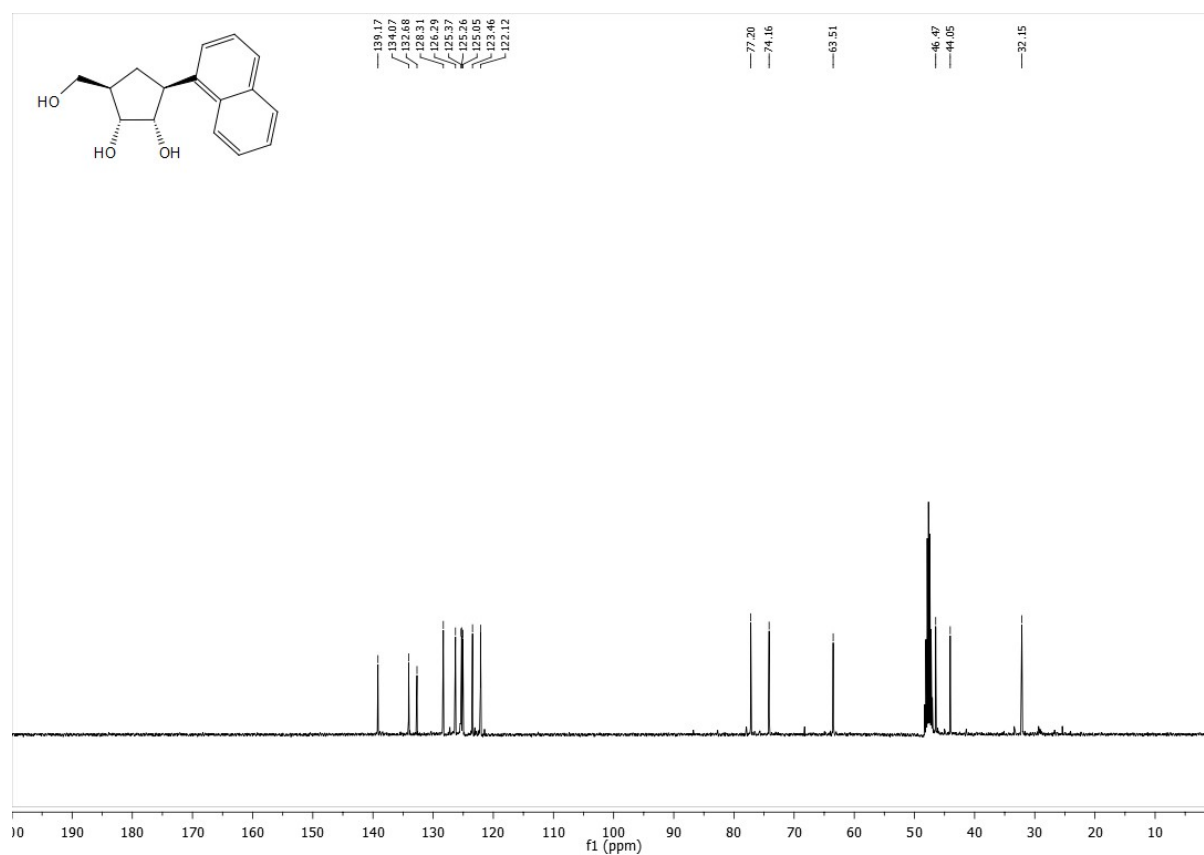

**(1R,2S,3S,5R)-3-(2,4-difluoro-5-methylphenyl)-5-(hydroxymethyl)cyclopentane-1,2-diol (11i)**

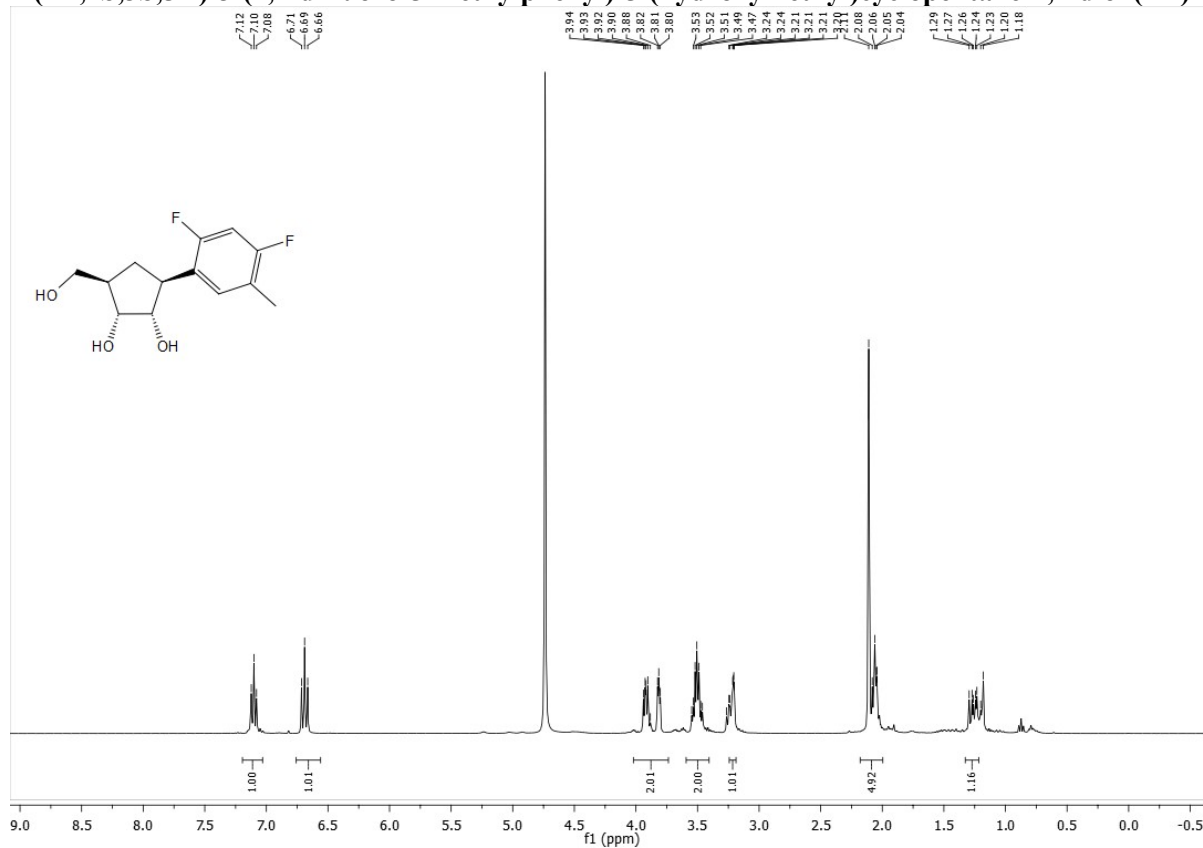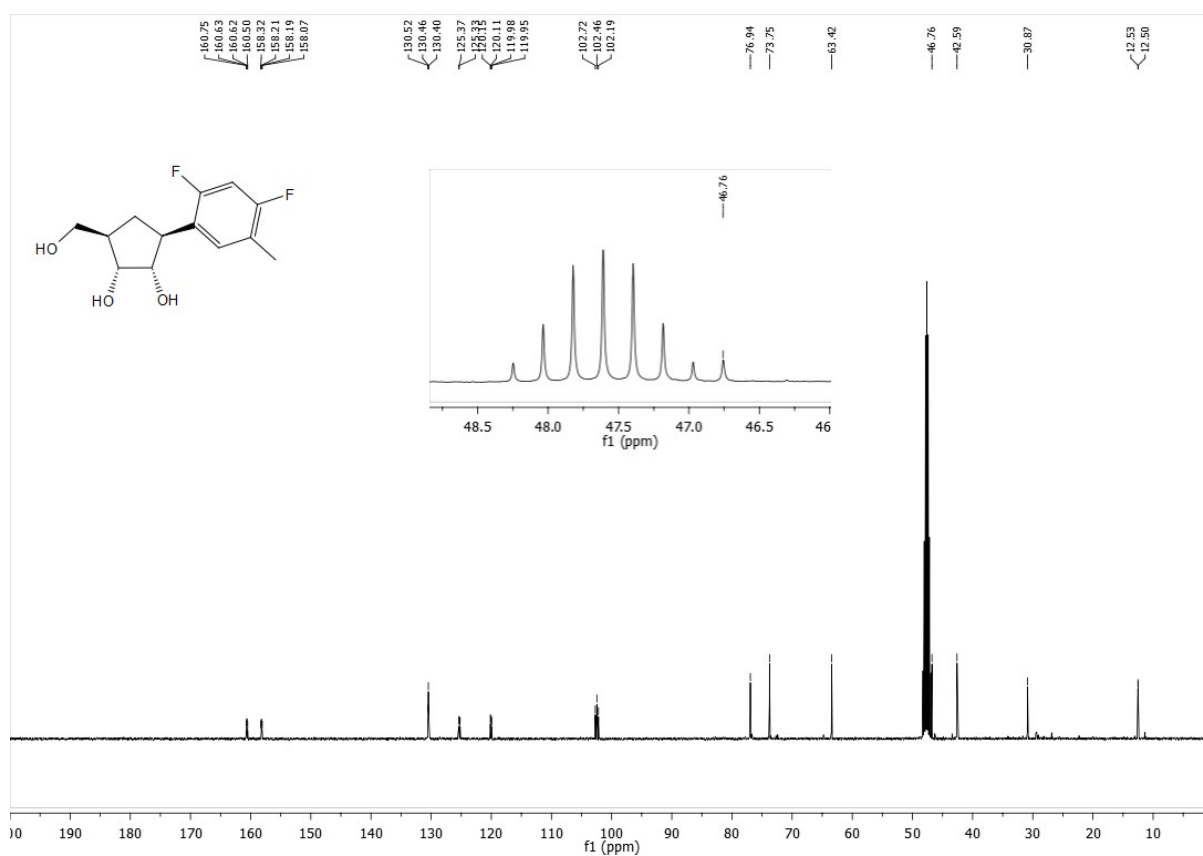

**(1S,2R,3R,5S)-3-(hydroxymethyl)-5-(pyridin-3-yl)cyclopentane-1,2-diol (11j)**

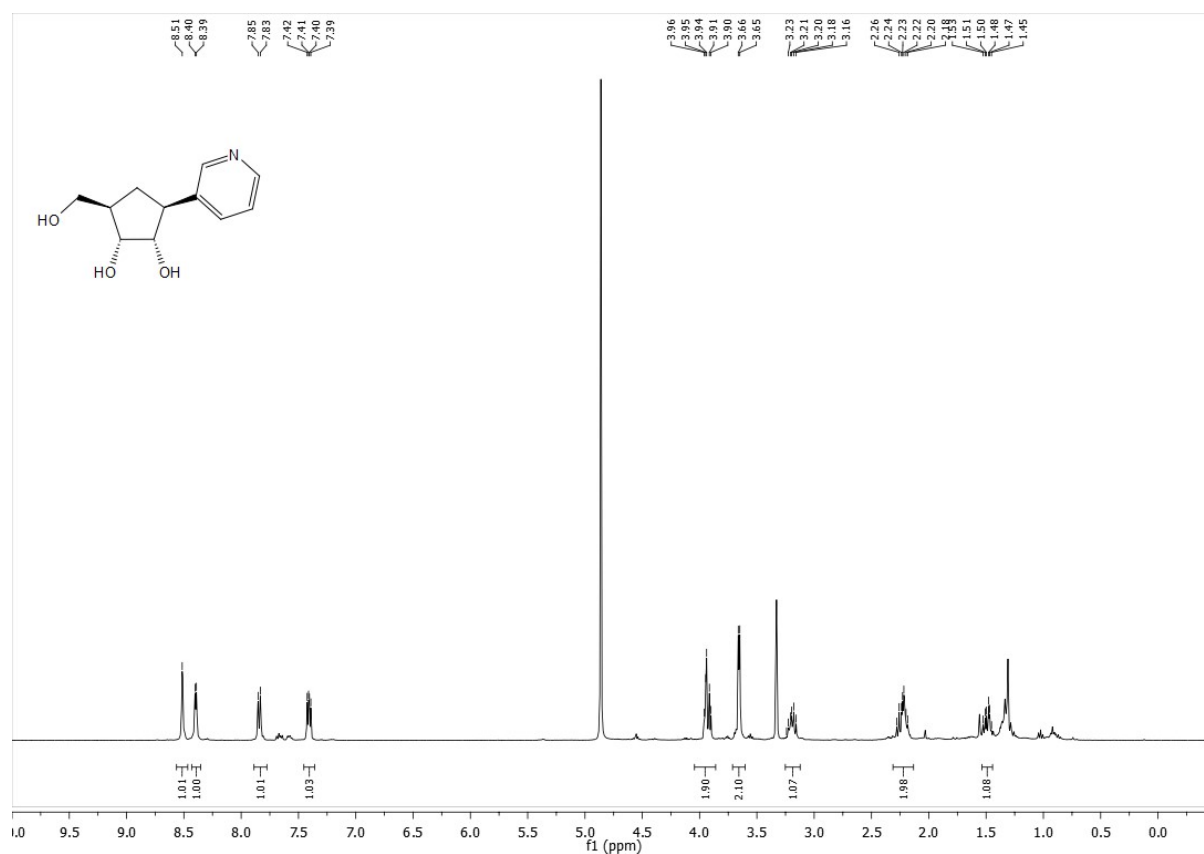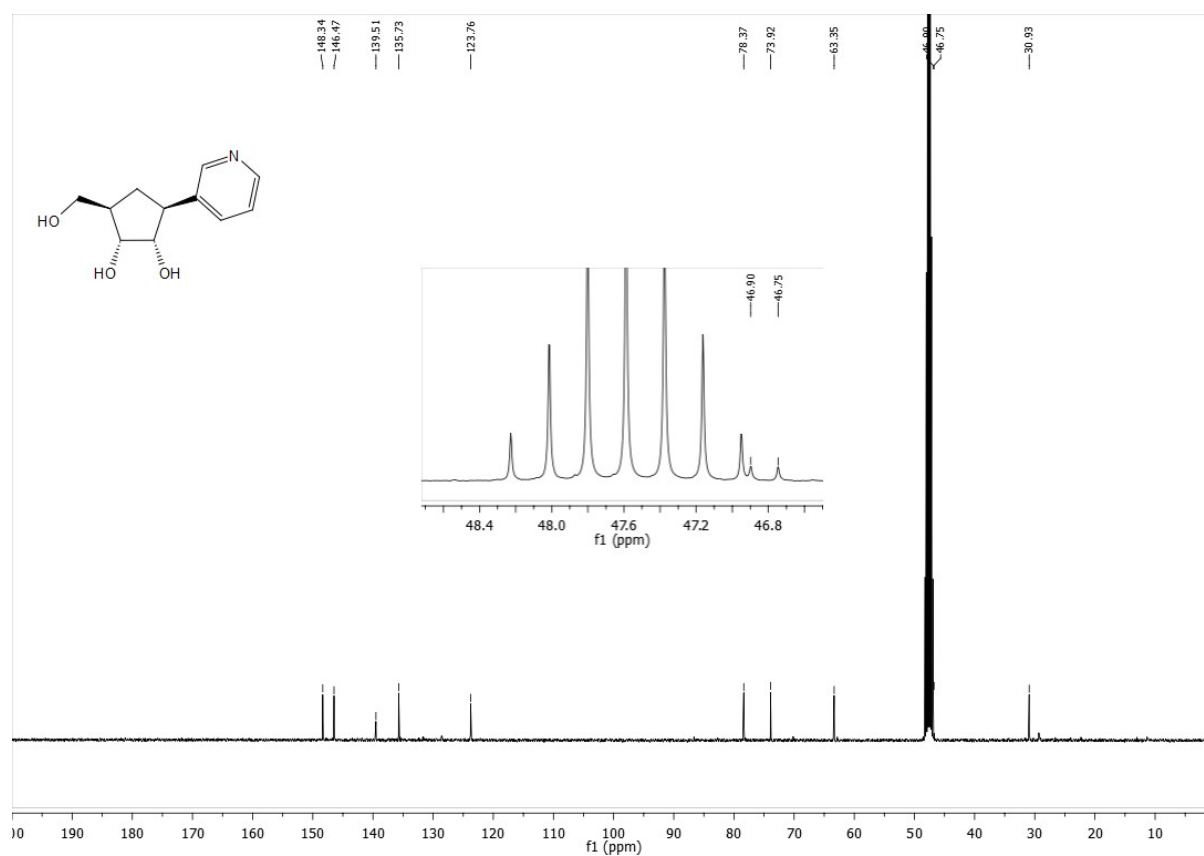

**(1R,2S,3S,5R)-3-(6-fluoropyridin-3-yl)-5-(hydroxymethyl)cyclopentane-1,2-diol (11k)**

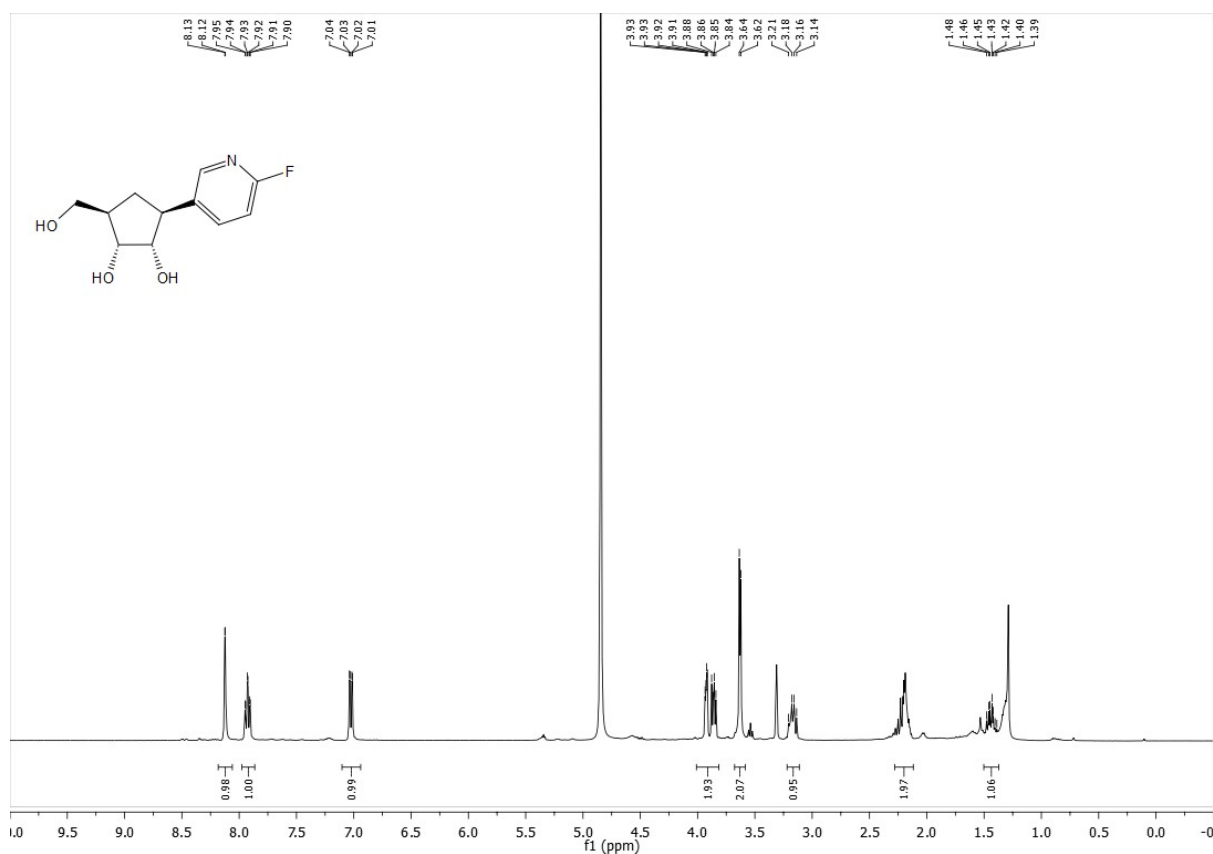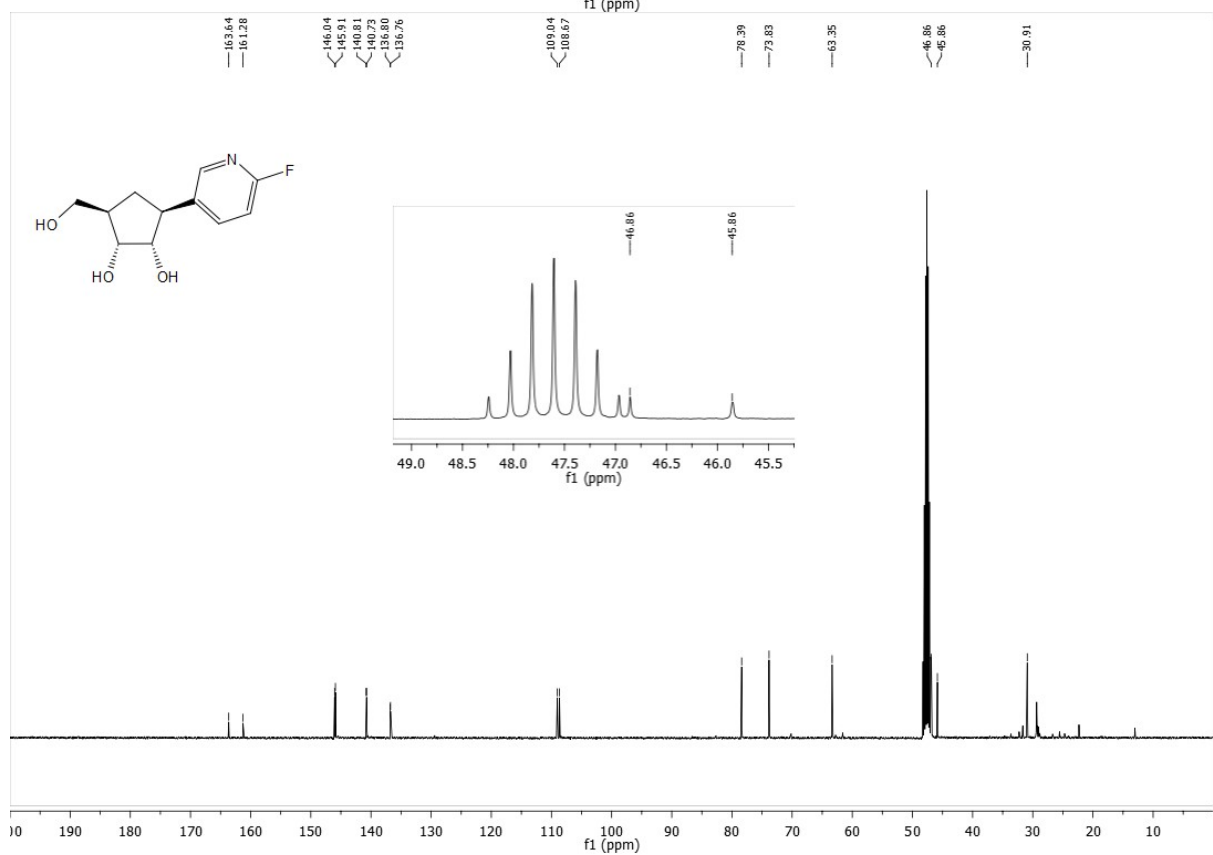

4-((1S,2S,3R,4R)-2,3-dihydroxy-4-(hydroxymethyl)cyclopentyl)benzonitrile (11)

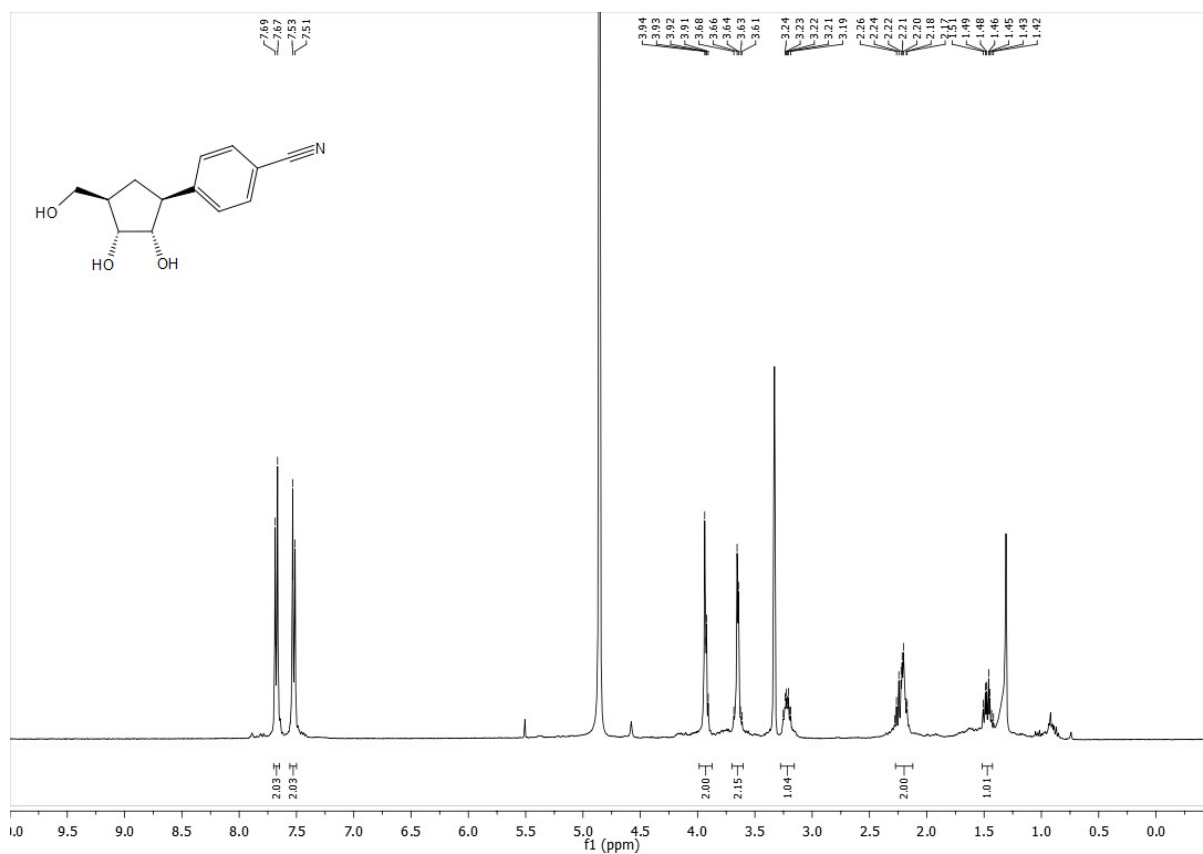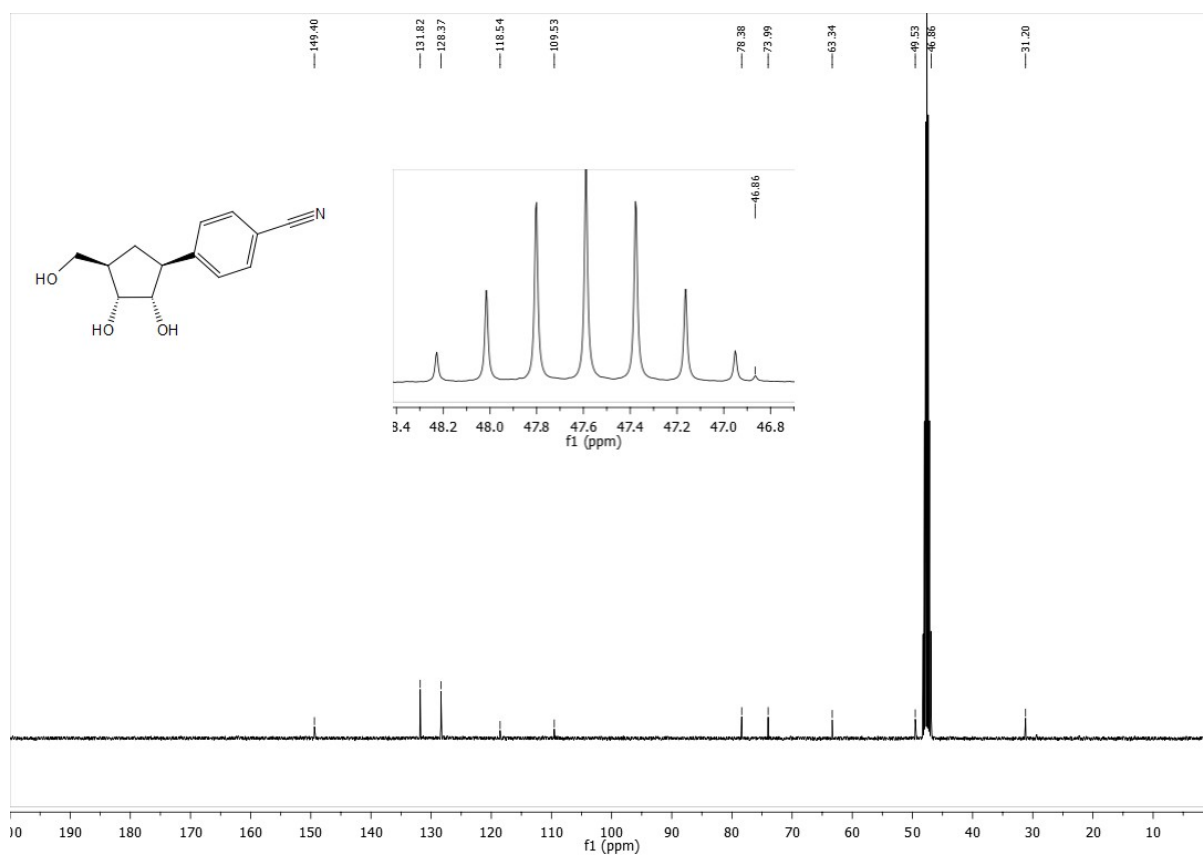

**3D view (JSmol viewer) of best conformer of compound 2 calculated by Cheminfo**

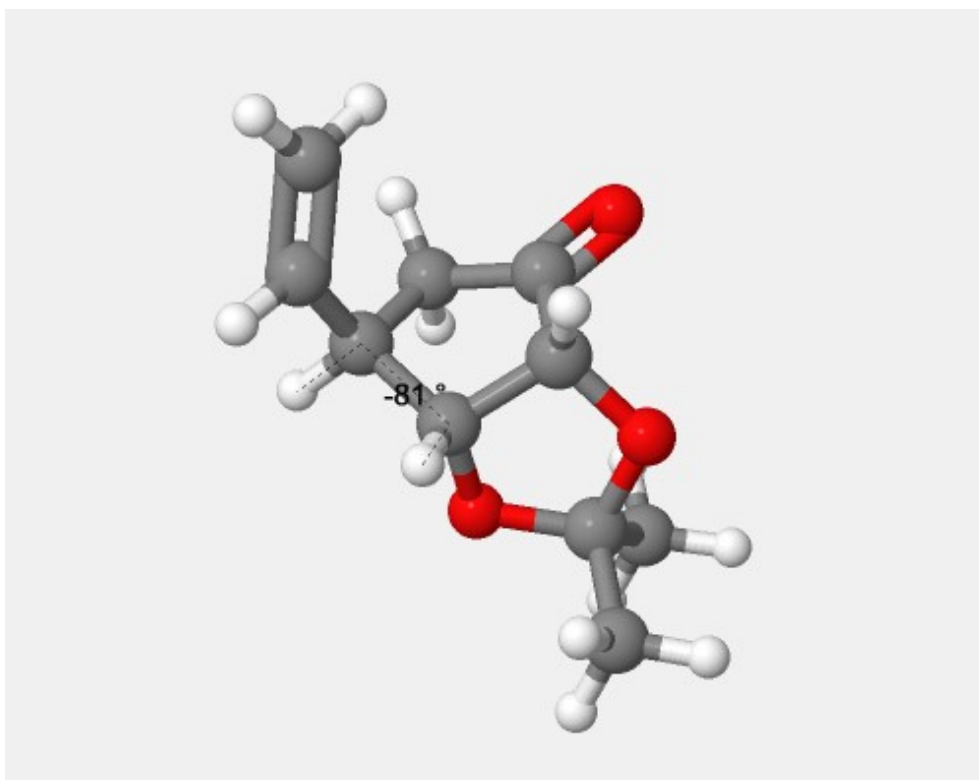

*(from [http://www.cheminfo.org/flavor/scgc/3D\\_models/2D\\_to\\_3D/index.html](http://www.cheminfo.org/flavor/scgc/3D_models/2D_to_3D/index.html))*

**3D view (JSmol viewer) of best conformer of compound 3 calculated by Cheminfo**

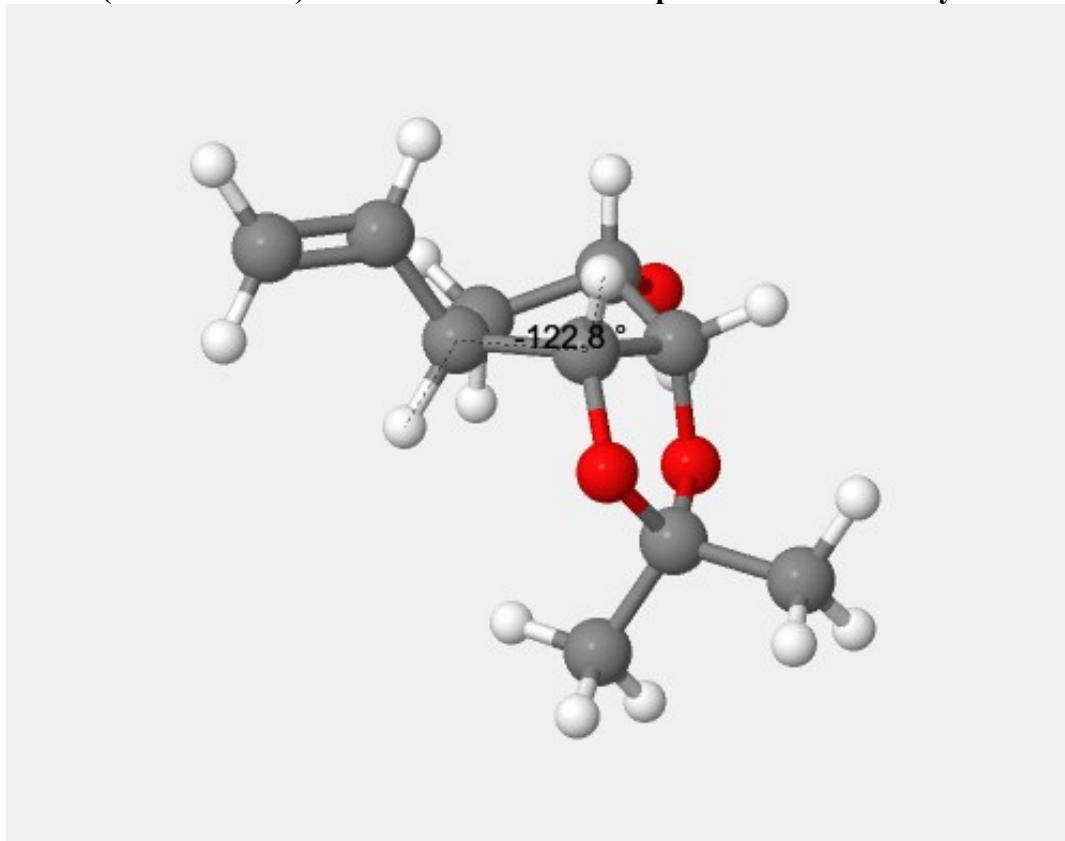



*(from [http://www.cheminfo.org/flavor/scgc/3D\\_models/2D\\_to\\_3D/index.html](http://www.cheminfo.org/flavor/scgc/3D_models/2D_to_3D/index.html))*
